# Supplementary material
Source: PubMed Central journal article supplement (PMC6744916)
Supplement: pnas.1910229116.sapp.pdf [file pnas.1910229116.sapp.pdf]

# Supplementary Information for

Tetep genome sequencing and identification of rice blast-resistant genes  
in the genome

Long Wang<sup>a,1</sup>, Lina Zhao<sup>a,1</sup>, Xiaohui Zhang<sup>a,1</sup>, Qijun Zhang<sup>b,1</sup>, Yanxiao Jia<sup>a</sup>, Guan Wang<sup>a</sup>, Simin Li<sup>a</sup>, Dacheng Tian<sup>a</sup>, Wen-Hsiung Li<sup>c,d,2</sup>, Sihai Yang<sup>a,2</sup>

## **Corresponding Authors:**

Wen-Hsiung Li  
Email: wli@uchicago.edu

Sihai Yang  
Email: sihaiyang@nju.edu.cn

## **This PDF file includes:**

Supplementary text  
Figs. S1 to S8  
Tables S1 to S14  
Captions for datasets S1 to S4  
References for SI reference citations

## **Other supplementary materials for this manuscript include the following:**

Datasets S1 to S4

## Supplementary Information Text

### SI Materials and Methods

#### DNA and RNA preparation and sequencing

The genomic DNA was extracted from young (~ 1 month old) Tetep leaves (multiple seeds) using the Cetyltrimethyl Ammonium Bromide (CTAB) method (1). To obtain high-molecular-weight DNA suitable for PacBio sequencing, we replaced the vortex steps by inversion to avoid shearing of the DNA. RNA was extracted from two-week old leaves (two replications) of Tetep with TaKaRa MiniBEST Plant RNA Extraction Kit.

For PacBio sequencing, five libraries (20kb templates) were built using DNA Template Prep Kit 3.0 and DNA/Polymerase Binding Kit. All libraries were sequenced on a PacBio RS II platform with P6-C4 chemistry at BGI, Shenzhen, China, yielding 50 SMRT cells. For Illumina sequencing, two libraries with insert sizes around 500bp and 350bp were sequenced on Hiseq 2000 ( $2 \times 100$ bp) and Hiseq 4000 ( $2 \times 150$ bp) platforms, respectively (*SI Appendix*, Table S1). Genomic DNA of MH63, IR24 and nine of their derivatives through crosses with Tetep were sequenced on a Hiseq 2000 platform, with ~500bp insert size and the  $2 \times 100$ bp read format. The Tetep RNA samples were sequenced in the  $2 \times 150$ bp format on the Illumina Hiseq 4000 platform, each with ~120M clean reads.

#### *De novo* assembly

A Tetep genome draft was built using PacBio RSII subreads (*SI Appendix*, Fig. S1), which were extracted from the raw h5 file using bash5tools.py bundled with SMRT Analysis Software v2.3.0 (<http://www.pacb.com/products-and-services/analytical-software/smrt-analysis/>). Subreads less than 500bp long or with a read score less than 0.8 were filtered out, and the remaining subreads were assembled using the Canu assembler v1.4 (2). Canu was run with default parameters except with “genomeSize=449m ovsMemory=40g-100g”. The assembled contigs were polished by Quiver (bundled with the SMRT Analysis Software); the polishing step used all PacBio data to correct sequencing errors in assembled contigs.

The polished contigs were then anchored to twelve chromosomes according to the *Oryza sativa* ssp. *indica* genome MH63 (3). The MH63 genome was constructed by combining the bacterial artificial chromosome (BAC)-by-BAC approach and the Illumina whole genome shotgun (WGS) data, which could thus be used as a high-quality reference genome. We first searched for the best matches between the Tetep contigs and the MH63 genome using NCBI blastn with a e-value  $< 1e-10$ . The hits were then fed to Chromosomer (4), a reference-based genome arrangement tool, to produce the Tetep draft chromosomes. Chromosomer was run with the gap size set to 20kb, equal to the insert size of the PacBio library, and the ratio threshold set to 1.1. The ordering procedure linked contigs into chromosomes with padding gaps (“Ns”), which were then filled with all raw PacBio subreads using PBJelly (5). Finally, we ran a second round of Quiver to polish those filled gaps.

The assembled genome is smaller than that estimated by flow cytometry (6). However, the assembled size is similar to those estimated through the Kmer-based approach (*SI Appendix*, Table S13), suggesting that our assembly is complete. This is also reflected by a high portion (98.0%) of the 248 core eukaryotic genes present in our Tetep genome draft (*SI Appendix*, Table S3).

### **Error estimation**

We used the Illumina sequencing reads to estimate the error rate in the assembled Tetep genome. The short Illumina reads were first mapped to the assembled Tetep genome with BWA-MEM 0.7.10-r789 (7). The mapped results were then processed with Picard (version 1.114) MarkDuplicates to remove non-biological PCR duplicates (8). Then, we called homozygous SNPs and indels (1~3bp) using GATK (version 3.7) HaplotypeCaller with option “-stand\_call\_conf 30.0”. As the DNA sources for PacBio and Illumina sequencing were nearly identical (from the same seed pool), those homozygous variants called from Illumina reads most likely resulted from uncorrected sequencing errors in the assembled genome. The heterozygous variants were mainly caused by mapping errors in duplicate regions and were thus discarded. The error rate was then estimated as the number of homozygous variants / the assembled genome size. The estimated error rate was  $< 2 \times 10^{-6}$  for base errors and  $< 1 \times 10^{-5}$  for indel errors.

### **Whole genome alignment and variant identification between Tetep and the other three rice genomes**

The Tetep genome was aligned to the Nipponbare, MH63 and R498 genomes using MUMmer version 3.1 (9) with options “--maxmatch -c 200 -l 100”. The results were filtered using “delta-filter -1” to get one-to-one alignments. SNPs and small indels were detected using “show-snps -ClrT”, while large indels and structural variants were identified through the “show-diff” function. The average genome diversity was estimated as “Number of SNPs / Number of aligned bases”.

### **Prediction of *NLR* genes and identification of *NLR* pairs**

Protein-coding genes were first identified using a two-pass MAKER-P pipeline (10), which collected evidence from homologous expressed sequence tags (EST data, retrieved on April 6<sup>th</sup>, 2016 from NCBI dbEST using “*Oryza sativa*” as the keyword), homologous protein sequences (retrieved on May 27<sup>th</sup>, 2016 from UniProt using “*Oryza sativa*” as the keyword) and local transcriptome sequencing data. The first pass of MAKER-P uses a trained SNAP (11) model based on the gff file generated by CEGMA, while the second pass uses a re-trained SNAP model and a trained AUGUSTUS (12) gene model based on the first pass. The local RNA-seq data were used as evidence after being assembled using both Cufflinks (13) (genome-guided assembly, first mapped to the Tetep genome using STAR (14) aligner) and Trinity (15) (genome-free transcriptome *do novo* assembly).

For each annotation set, the NB-ARC domain was predicted using hmmscan

(HMMER version 3.1b2) against the Pfam database version 30.0 (16). The LRR domains were predicted with NLR-parser (version 1.0) by searching for motifs 9, 11 and 19 (17). We found that the evidence-based pipeline captured very few *NLRs* (*SI Appendix*, Table S4). One possible explanation for this could be that the MAKER-P pipeline relies heavily on homology- or expression-based evidence, while such evidence is mostly lacking for *NLRs* because *NLRs* are generally expressed at low levels and are highly polymorphic. To generate a comprehensive Tetep *NLR* set, we applied an *ab initio* gene-finding program Fgenesh (18) for gene prediction. Fgenesh was run by choosing the “*Oryza sativa* Indica Group” as the organism-specific gene-finding parameters. Before prediction, we masked the repeat sequences using RepeatMasker (19) with option “-species rice” against RepBase (version 20170127). About 49% of the genome sequence was masked during this process (*SI Appendix*, Table S14). *NLRs* identified from the Fgenesh gene set recovered around 120 more *NLRs* which were lost in the MAKER-P set (*SI Appendix*, Table S4).

To test whether most *NLRs* in Tetep were properly predicted, we directly identified all putative *NLR* regions from the whole genome using NLR-annotator (17). The genomic regions containing putative *NLRs* (hereafter referred as “*NLR* regions”) were predicted by dividing the whole genome into 20kb sliding windows with a step size of 5kb. Through the Nipponbare genome, we estimated a coefficient of annotated *NLRs* compared to all putative *NLR* regions as “*NLRs* per Mb / *NLR* regions per Mb”. Under the assumption that the coefficient is the same in the Tetep genome, the number of all possible Tetep *NLRs* was calculated as “Effective genome size \* *NLR* regions per Mb \* coefficient”.

This strategy does not rely on any prior-annotated genes, so it is an unbiased predictor of the number of *NLRs* that are actually present in a genome (17). The NLR-annotator identified 519, 504, 514 and 531 putative *NLR* regions in Tetep, Nipponbare, MH63, and R498, respectively (*SI Appendix*, Table S4). Around 95.0% of predicted regions overlapped with those annotated ones in Tetep, Nipponbare and MH63, suggesting a high consistency (*SI Appendix*, Table S4). The remaining non-overlapping regions likely corresponded to regions with pseudogenes. The overlapping rate was lowest in R498 genome (85.3%), suggesting that fewer *NLR* genes annotated (i.e. those genes that were not predicted in the original gene set as we used the same *NLR* prediction pipelines for all genomes) in the R498 genome. Therefore, we concluded that our prediction captured nearly all *NLRs* in the three genomes. Even if we take the number of *NLRs* in Nipponbare as a baseline (i.e. 100% *NLRs* identified), we should have missed fewer than 32 *NLRs* (~7.0% of identified *NLRs*) in the Tetep genome. This not only implies that the *NLR* genes we discovered in the Tetep genome were comprehensive, but also suggests that we made a fair comparison among the four different rice genomes. For the R498 genome, the identified putative *NLR* regions was similar to the other three genomes.

Homologs of each Tetep *NLR* gene in Nipponbare, MH63, and R498 were identified by OrthoFinder (20) (version 2.2.7, default parameters) using their NB-ARC protein sequences. Each homologous pair (i.e. Tetep vs Nipponbare, Tetep vs MH63, or Tetep vs R498) was then aligned by coding sequence using MUSCLE

(21), and the nucleotide diversity (p-distance) between each homolog pair was calculated using MEGA-CC (22).

For phylogenetic analysis, the nucleotide sequences were first aligned by Clustalw2 (23). Their protein sequences were used as a guidance to avoid non-3 multiply gaps introduced in the final alignments. Phylogenetic trees were constructed using FastTree (24) (version 2.1.10) with options “-nt -gtr” (1,000 bootstrap replicates by default). FastTree was chosen in this study as it can rapidly infer maximum-likelihood (ML) phylogenies for huge alignments, and is robust to inaccurate alignments from the large number of divergent *NLRs*. It also produces better bootstrap-supported trees than other tools like RAxML (25) in all test runs. The phylogenetic trees were constructed using both the nucleotide sequences of the full coding region and the nucleotide sequences of the NB-ARC domains. Since both results were highly consistent with each other topologically, only the results using full coding sequences were presented in the paper as they give clearer distinguishable clades than using NB-ARC domains alone.

There are currently several known cases for which two *NLR* genes are required to effect the resistance function, with one protein in the pair acting in effector recognition (i.e. directly binding AVR effectors, known as a sensor) and the other acting in signaling activation (i.e. releasing the switch to initiate signaling, known as a helper). Since all pairs for which functions are known are present in the head-to-head arrangement in a genome, we searched for head-to-head *NLR* genes in the Tetep, Nipponbare, MH63 and R498 genomes. The candidate *NLR* pairs were first identified through searching for *NLR* genes near each other (enclosing no more than 2 non-*NLR* genes) in five different genomes, i.e. the Tetep, Nipponbare, MH63, R498 and *B. distachyon* genomes. Most candidate *NLR* pairs were found with the head-to-head arrangement, but some could be changed due to genomic rearrangement events. Therefore, the *B. distachyon* genome was chosen as an outgroup to infer the ancestral state. An *NLR* pair would be retained if itself or any of its homologous pairs in *B. distachyon* or any other rice genomes followed the head-to-head arrangement. The identified *NLR* pairs were then used to construct phylogenetic trees (Fig. 4 and *SI Appendix*, Fig. S3), and were further confirmed by our manual inspection of the phylogenetic tree to make sure that the two members of a pair were not from a recent duplication of a single *NLR* after splitting of the ancestors of a cultivar. In this study, a sensor (helper) was identified by its homologous relationship with sensor (helper) members of known *NLR* pairs. If this definition could not be made, we checked whether it carries an extra domain that might recognize pathogens (i.e., a sensor if yes, but a helper if not). Some examples of extra domains are WRKY, RATX, NOI, and TRX, which could act as a decoy of pathogen effectors (26).

### **Large-scale cloning, transformation and testing of *NLR* genes**

Multiple PCR primer pairs were designed for each *NLR* gene based on the Tetep genome sequence (*SI Appendix*, Dataset S4). The products of long-range PCRs with the native promoter and terminator were inserted into the binary vector pCAMBIA1300. To improve the cloning efficiency, we introduced a new restriction

site, ASCI, into the multiple cloning sites (MCS) of pCAMBIA1300. For some genes originally harboring the ASCI restriction site, we used XbaI, SalI, EcoR I, BamHI, KpnI or XhoI as the alternatives. After validation by Sanger sequencing, each clone was transformed into two blast-susceptible cultivars, TP309 and Shin2, using the *Agrobacterium* strain EHA105. Transgenic lines (T<sub>0</sub>) were first confirmed by PCR and Sanger sequencing to ensure the presence of desired transgenic DNA fragments, and then grown in the field to obtain seeds (T<sub>1</sub> and T<sub>2</sub>) for further testing. Approximately 93 *NLRs* were sequenced with 5 or more reactions, yielding longer assembled sequences, and were used in comparison with annotated *NLRs*. The assembled Sanger sequences have been deposited in the Figshare database (<https://doi.org/10.6084/m9.figshare.7775810.v1>).

The 12 pathogen strains used in this study were chosen in consideration of their geographic origin, sequence diversity and sporulation efficiency from 61 field strains collected from various geographic areas of China during 2008-2009 and characterized by Huang et al. (27) (*SI Appendix*, Fig. S2). The leaf blast resistance was evaluated in T<sub>1</sub>-T<sub>2</sub> plants (3-weeks old seedlings) after spraying the blast spore suspension ( $5 \times 10^5$  spores/ml) and placing in the dark for 24 h (100% humidity, 26°C), followed by 12-h light/12-h dark (90% relative humidity) for 6-7 days until disease spots appeared clearly.

For each test, the number of tested blast strains was usually less than 12, for three reasons: 1) Hard-to-control sporulation efficiency of a blast strain. Our definition of a successful plant infection included a blast spore suspension with  $5 \times 10^5$  spores/ml. Although the experimental environments were strictly managed, the sporulation efficiency sometimes varied across strains, possibly due to subtle environmental disturbances. This led to fewer than 12 strains with sufficient inoculum concentration for testing. 2) Loss of proper controls, especially the susceptible controls, in some cases. In order to make sure the testing results were trustable, we required the resistant (Tetep) and susceptible controls (TP309 and Shin2 wild-type) to behave properly when treated under the same conditions. However, several controls occasionally behaved unexpectedly, e.g. if the susceptible control displayed resistance to a certain pathogen strain, possibly caused by some unnoticeable environmental influences, then those testing results for the strain would become invalid. 3) To provide reliable results, we required consistent testing outcomes across three independent replicates. As each replicate had varied pathogen strains available for testing, the final number of successful tests became even fewer.

For each gene, 8-10 independent transformants were selected. We conducted a pilot survey on transformants of *Pi37* and 20 other randomly selected *NLRs* and found that the resistance phenotypes were highly consistent across independent transformants of those genes. Therefore, to reduce the workload in managing each of those transformants independently, which could be extremely labor-intensive, we did not further distinguish between independent transformants in subsequent experiments once we obtained the true positive transgenic lines. Such a strategy greatly increased the speed of the large-scale testing. In addition, we made a trade-off by only considering those most reliable resistant transformants (equivalent to a quantitative

scale of 0-2 on the 0-9 scale of standard evaluation system of rice (28)) as resistant (*R*) to further simplify the procedure. The binary vector pCAMBIA1300 can be purchased from Addgene (<http://www.addgene.org>). The modified plasmids as well as seeds for transgenic analyses are available upon request.

### **Pedigree tracing of *NLR* genes in Tetep descendants**

The selected resistance rice pedigree contains three parental lines, four intermediate lines, and five elite descendants (Fig. 3A). The intermediate lines IR1544 and 1318 confer strong resistance to blast disease. Wanhui88 (WH88) and Duoxi-1-hao (DX1) are excellent restorer lines with moderate resistance to blast disease. All five elite lines, i.e. Chenghui047 (CH047), Mianhui2009 (MH2009), Neihui2539 (NH2539), Shuhui527 (SH527) and Zhonghui8006 (ZH8006), were bred with the aim to improve their yield and quality while sustaining part of the resistance from their resistant donors. MH2009 displayed strong blast resistance, at level 4~5 (6~8 for the MH63 control) to leaf blast and level 3~5 (7~9 for the MH63 control) for neck blast (tested in 1996, 1997, 1999, 2001 by Institute of Plant Protection, Sichuan Academy of Agricultural Sciences) (29). SH527 also confers strong resistance to blast, showing a resistance level of 0~3 (tested by Sichuan Agricultural University during 1996~1998) (30). CH047 showed very strong blast resistance, i.e. at level 4 (9 for the MH63 control) to leaf blast and 0 (2 for the MH63 control) to neck blast (tested during 1997~1998 by Institute of Plant Protection, Sichuan Academy of Agricultural Sciences) (31). NH2539 is an excellent restorer line for rice breeding and has good blast resistance in production (32), while ZH8006 has been less studied for its resistance in the literature.

Sequencing reads of all related cultivars from the selected Tetep pedigree were mapped to the Tetep genome using the same pipeline described above. To test whether an *NLR* gene in Tetep was passed to its descendants, we divided the whole genome into 10kb windows and calculated nucleotide diversities between each cultivar and Tetep. For each window, a cultivar was considered to have a Tetep source if the cultivar was much more similar to Tetep (nucleotide diversity  $\leq 0.016\%$ , the median of nucleotide diversities across all Tetep's derivatives) than to any of its other parents (nucleotide diversity  $\geq 0.025\%$ , the median of nucleotide diversities across all non-Tetep parents). The *NLR* genes residing in the inherited windows were then regarded as derived from Tetep. Venn tool on <http://bioinformatics.psb.ugent.be/webtools/Venn/> was used to create the Venn diagrams.

### **Generation of knockout mutants of paired *NLRs***

To generate knockout mutants for those sensor and helper *NLRs*, unique single-guide RNA (sgRNA) spacer sequences were designed to target the coding parts before or within the region encoding the NB-ARC domain of a target *NLR*. Each spacer's complementary oligonucleotides were inserted into the BsaI restriction site of sgRNAs. Each sgRNA was then incorporated into the Cas9 vector using the Gateway

recombination method (33) and transformed into the *japonica* cultivar Wuyungeng24. The transformed lines were verified using PCR and Sanger sequencing when the transgenic plants were 20~30 days old.

Among all designed *NLRs*, only 78 of the 264 transformed plants were successfully edited, suggesting an overall editing rate of ~29.6% (*SI Appendix*, Table S10, rate calculated as “edited plants” / “all transformed plants verified”). Eight non-*NLR* genes were arbitrarily selected and edited with the same procedures in Wuyungeng24 which served as controls (*SI Appendix*, Table S10). This editing rate was noticeably lower than that for the non-*NLR* genes surveyed (~67.5%), indicating a fitness reduction in some failed cases possibly due to autoimmunity. Such a fitness cost was also suggested by phenotypic changes and unsuccessful cases in our large-scale *NLR* gene cloning and transformation experiments (*SI Appendix*, Fig. S4 and Table S11).

Potential off-target sites were predicted using Cas-OFFinder (34) for 18 Cas9 sgRNAs from those edited plants with “NRG” string to match both the canonical NGG and non-canonical NAG PAM (protospacer adjacent motif) (35). No sgRNAs had predicted off-target sites with fewer than 2-nt mismatches, and only 4 sgRNAs had predicted off-target sites with 2-nt or more mismatches, suggesting that the designed spacers were highly specific. To further assess possible off-target effects, we arbitrarily selected 9 of 18 edited plants for whole genome sequencing and identified the mutations in each plant using a pipeline described before (36). The targeted mutations were confirmed for all 9 sequenced plants, and no novel mutations were found in predicted off-target sites even when up to 3-nt mismatched were allowed, suggesting a very low off-targeting rate. This was consistent with the high specificity and low off-targeting rate of the CRISPR/Cas9 system reported before (37).

To further confirm the resistance function of the paired *NLRs*, we tried to transform each pair as a unit into a susceptible cultivar. Due to the technical difficulty in cloning long genes, e.g. >20kb, only two *NLR* pairs, *chr11.fgenesH1896/chr11.fgenesH1897* (*Os11g39310/Os11g39320*) and *chr11.fgenesH2445/chr11.fgenesH2446* (*Os11g45970/Os11g45980*), were successfully cloned from Tetep and separately transformed into the susceptible TP309 rice cultivar. The two transgenic plants either conferred strong or enhanced resistance to rice blast strains. For example, when testing neck blast, which is considered the most destructive phase of the blast disease (38), the transgenic TP309 plants with a single transformed helper *NLR chr11.fgenesH2446* could only confer resistance to one of the five tested blast strains, whereas the transgenic lines with the pair of *chr11.fgenesH2445/chr11.fgenesH2446* could confer resistance to all 11 tested blast strains (Fig. 4B, Two-sided Fisher's Exact Test,  $P = 0.00275$ ). Moreover, in line with a higher influence when a helper *NLR* was present alone, the transgenic plants of the two helpers, *tig00011732.fgenesH48* and *chr11.fgenesH2446*, displayed more frequent lethal phenotypes (4 of 20 and 5 of 20 individuals died during growth) than the transgenic plant of the sensor *tig00011732.fgenesH49* (only 1 of 20 individuals died during its growth, one-sided exact binomial test,  $P = 0.00013$ ).



## Design of a PCR marker set for verifying Tetep-derived *NLRs*

Candidate PCR primer pairs were designed using Primer3 (39) on all Tetep *NLRs* including 10kb upstream and 10kb downstream flanking regions. The candidate primer sequences were then mapped to the Tetep genome using Blastn (E-value = 10) and only unique primers (i.e., primers that hit only themselves) were selected.

The PCR primer pairs were designed to amplify nearly every *NLR* gene in the Tetep genome. For each single or paired *NLR* (a total of 43 identified *NLR* pairs), one or two primer pairs were designed (*SI Appendix*, Fig. S6A); ~ 60 *NLRs* only have one pair of primers because no other unique primer pairs could be designed (*SI Appendix*, Fig. S6, Datasets S1 to S3). For a *NLR* cluster (defined as a cluster of three or more *NLRs* with the distance between two adjacent *NLRs* < 300kb; a total of 23 clusters containing a total of 133 *NLRs*), usually three or four pairs of primers were designed to target the first and last genes plus one to target a middle region (*SI Appendix*, Fig. S6A).

We designed PCR primer pairs to amplify regions of 800 – 10,000 bp that are clearly distinct between Tetep and Nipponbare (representative for *japonica* rice cultivars) or 9311/MH63/R498 (representative for *indica* rice cultivars). For example, we designed 121 PCR primer pairs (*SI Appendix*, Fig. S6B and Dataset S1) each of which includes an indel (200~700 bp) between Tetep and Nipponbare or 9311/MH63/R498 (*SI Appendix*, Dataset S2), so that the PCR products could be immediately distinguished by their band sizes in gel electrophoresis (*SI Appendix*, Fig. S7A). However, as such indel markers are not abundant in *NLR* regions, the majority of our PCR markers made use of the presence of variant nucleotides between Tetep and other cultivars (*SI Appendix*, Dataset S3), that is, they are so-called allelic or allele-specific primers (*SI Appendix*, Fig. S6B). An allelic PCR primer pair could be verified by the presence/absence of a PCR band of the right size in the electrophoresis gel (*SI Appendix*, Fig. S6B and 7B). These candidate markers in Tetep were checked in the four other genomes, i.e. Nipponbare, 9311, MH63 and R498, using Blast search (E-value = 10). Each primer pair that had no hits in at least one of the four genomes was selected. The remaining PCR markers were selected by screening primer pairs that had Blast hits in other genomes but contained SNPs or small indels ( $\geq 2$  bp) compared to the corresponding Tetep regions (*SI Appendix*, Dataset S2). These PCR markers can usually also serve as allele-specific markers. If they cannot be distinguished by PCR bands, they can be checked by Sanger sequencing, although it may require more than one sequencing reaction. In total, we designed 1,909 PCR primer pairs.

We selected 320 primer pairs that target *NLR* regions in Tetep, tested them in Nipponbare and 9311, and found 282 successful pairs (*SI Appendix*, Dataset S1), yielding a success rate of  $282/320 = 88.1\%$ . The targeted regions include all of the 23 clusters (a total of 133 *NLR* genes) and 43 *NLR* pairs, so that the 320 primer pairs covered 268 *NLR* genes, over half of 455 Tetep *NLRs*. Importantly, only 146 of the 320 selected PCR primer pairs were required to verify all of the 23 *NLR* clusters and 43 *NLR* pairs. Thus, our PCR marker set can serve as a flexible and simple-to-use molecular marker library to rapidly verify every Tetep-derived *NLR* cluster and pair.

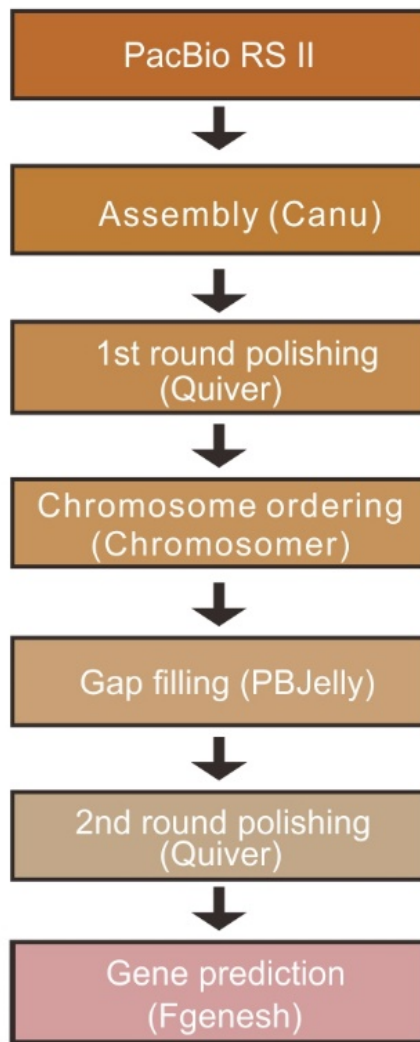

**Fig. S1. Assembly workflow of the Tetep genome.**

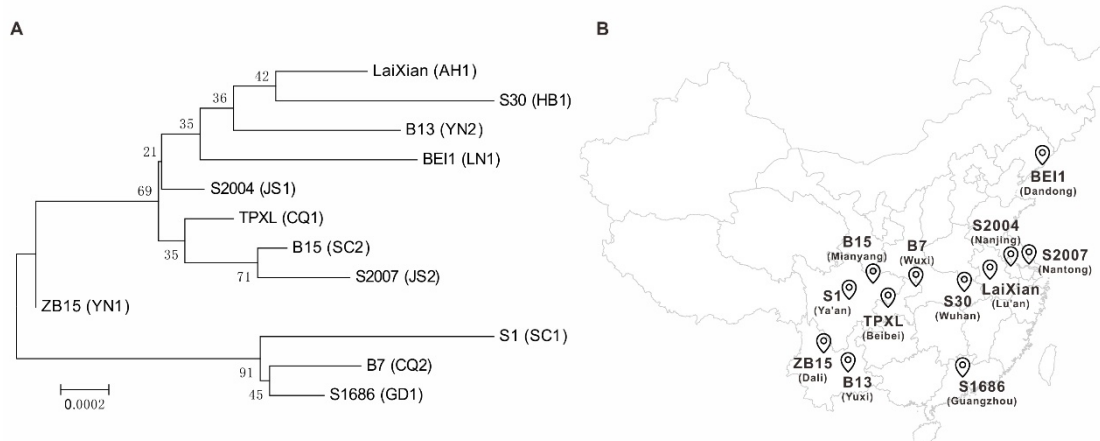

**Fig. S2. Phylogenetic tree and geographic locations of the 12 testing blast pathogen isolates.** (A) An ML phylogenetic tree adapted from Zhang et al. (2015) (40) where the same strains were used. The corresponding IDs used in Zhang et al. (2015) were given in parenthesis. (B) The geographic locations of the 12 testing pathogen strains. The city names where the strains were collected were given in parenthesis.

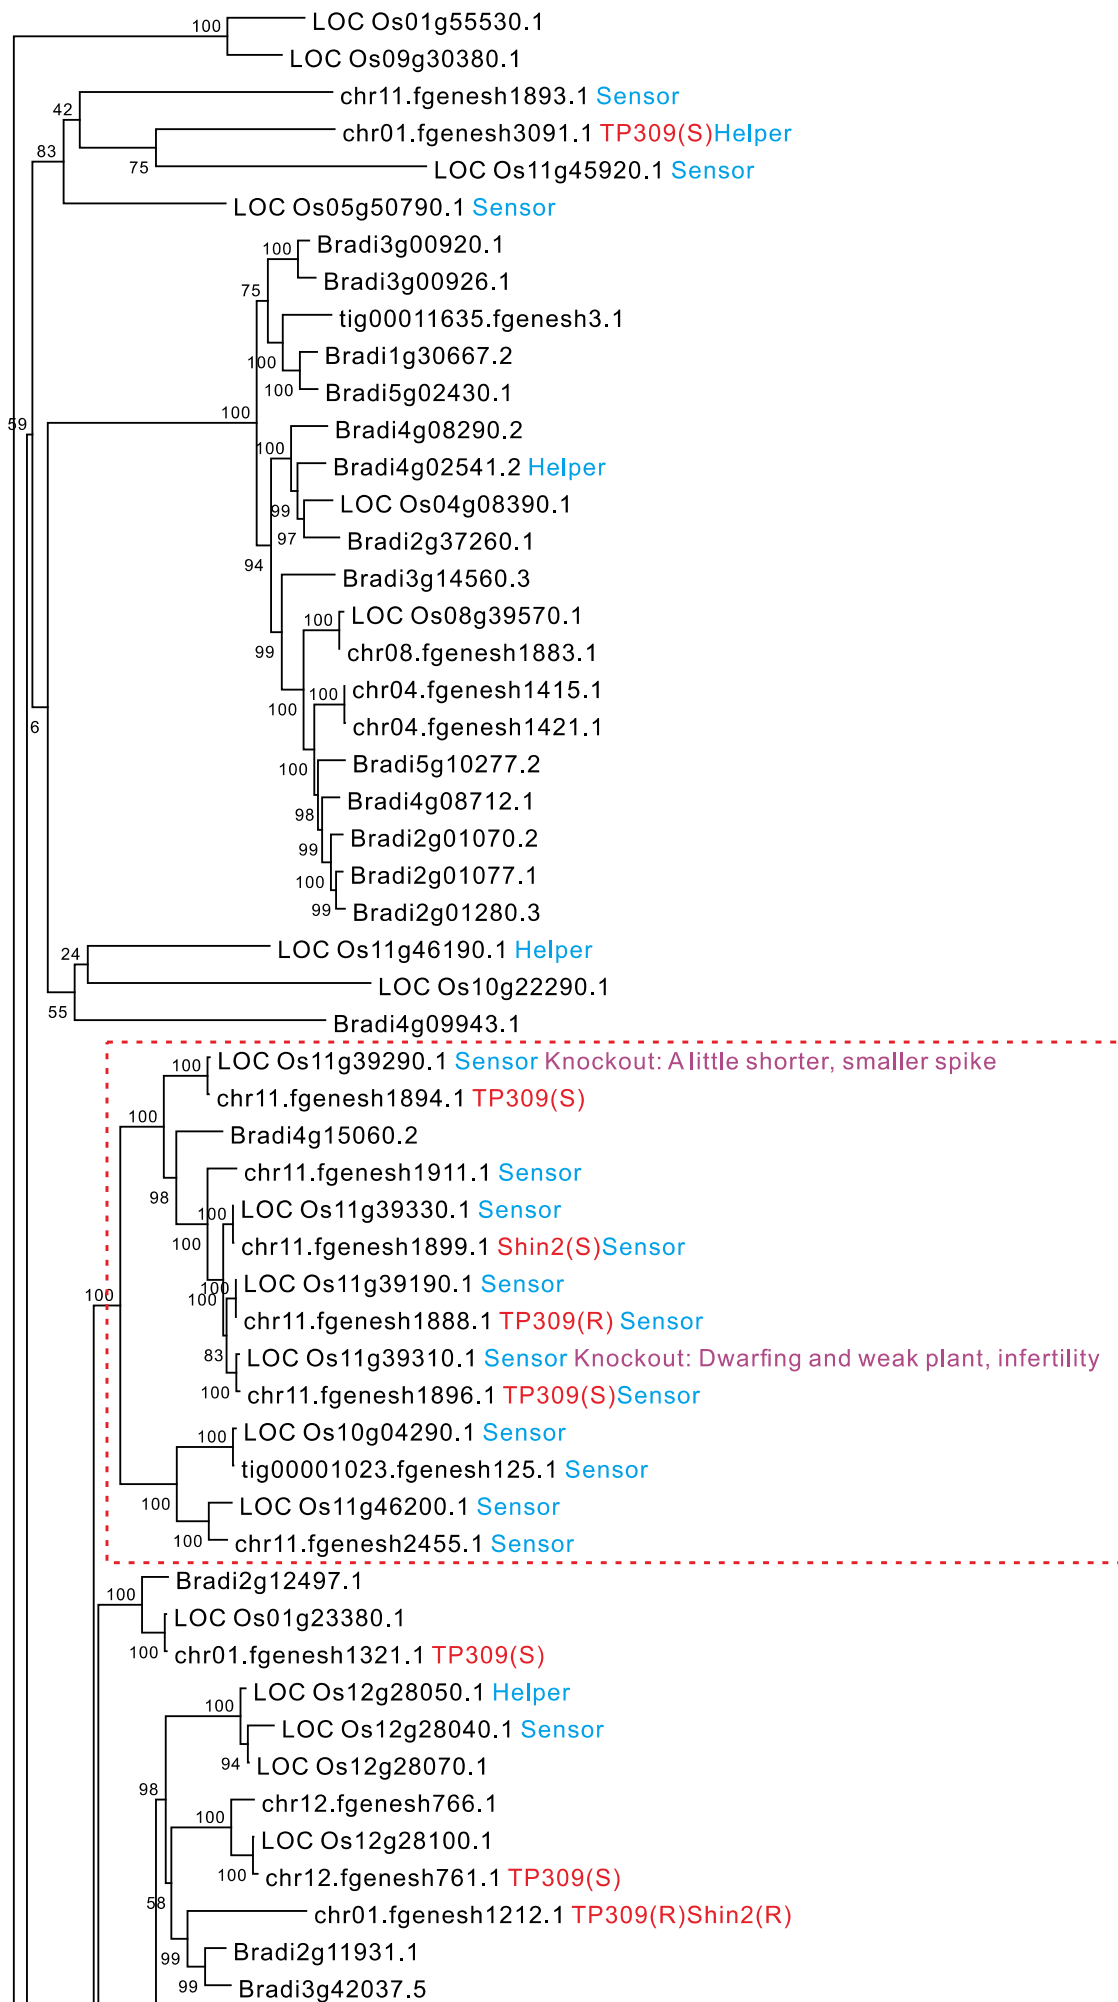

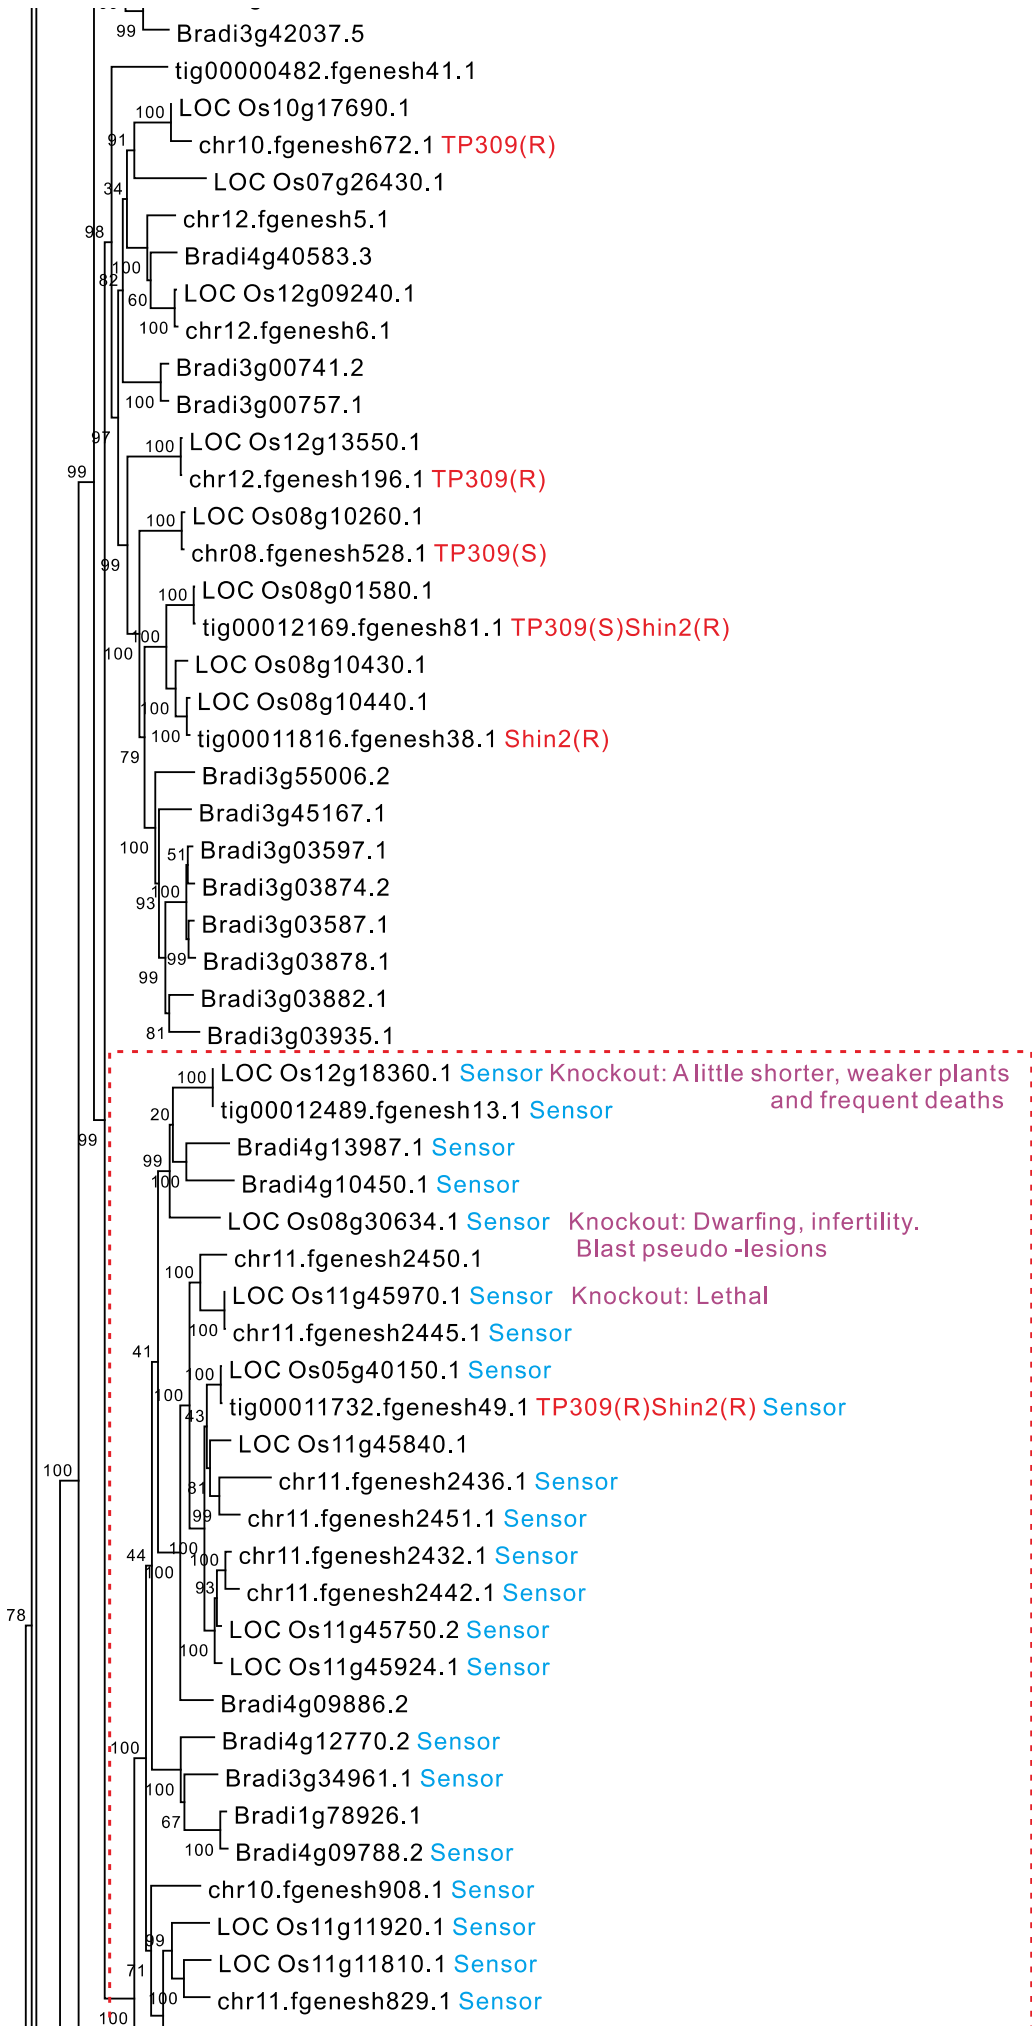

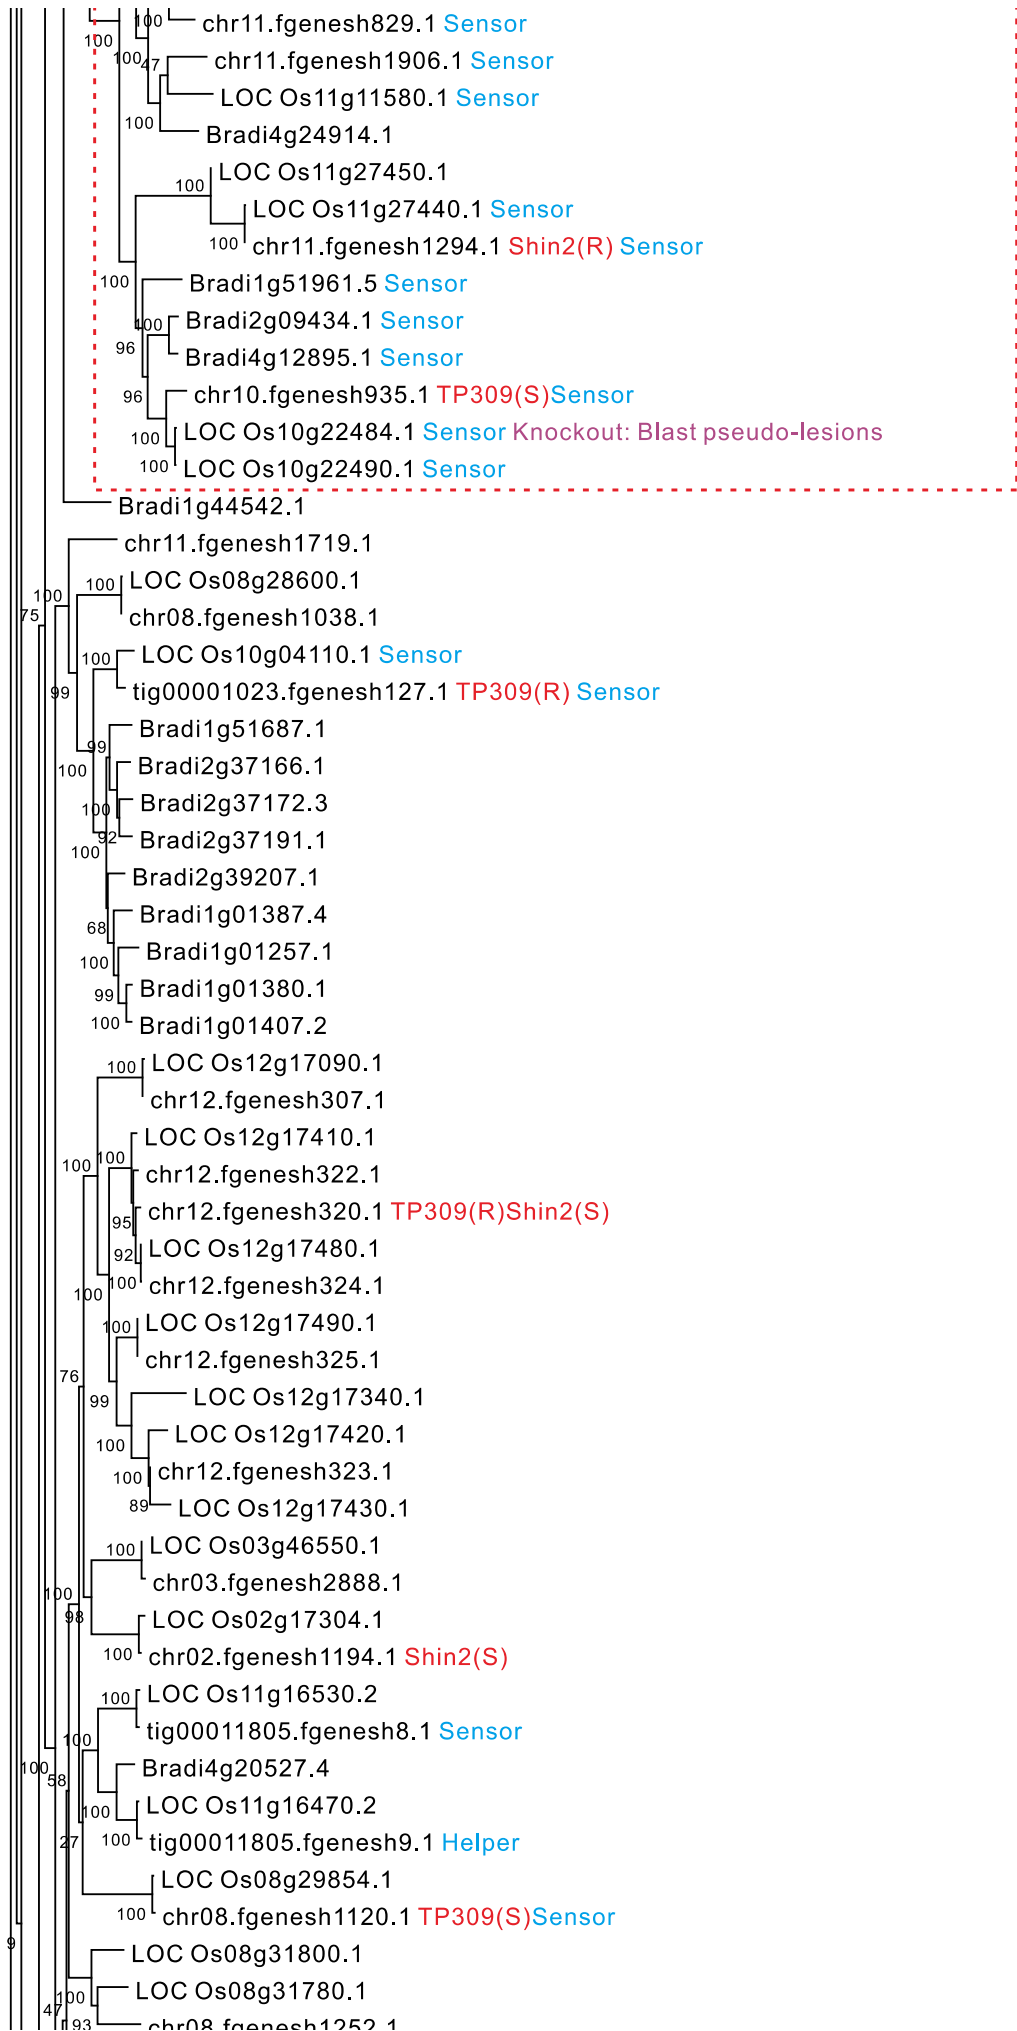

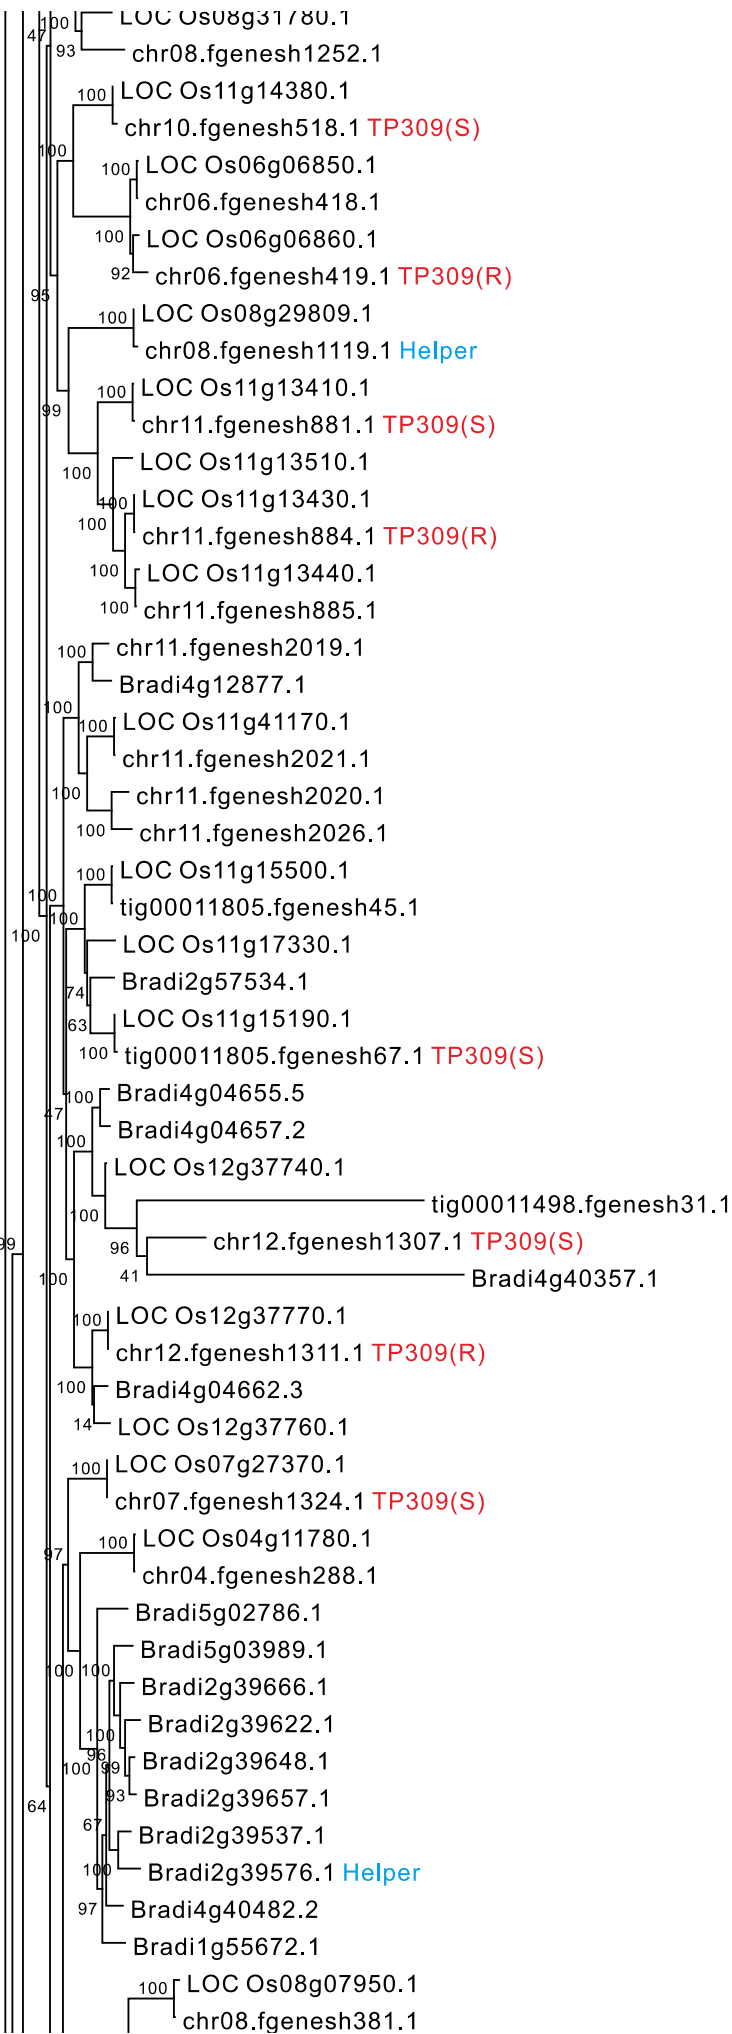

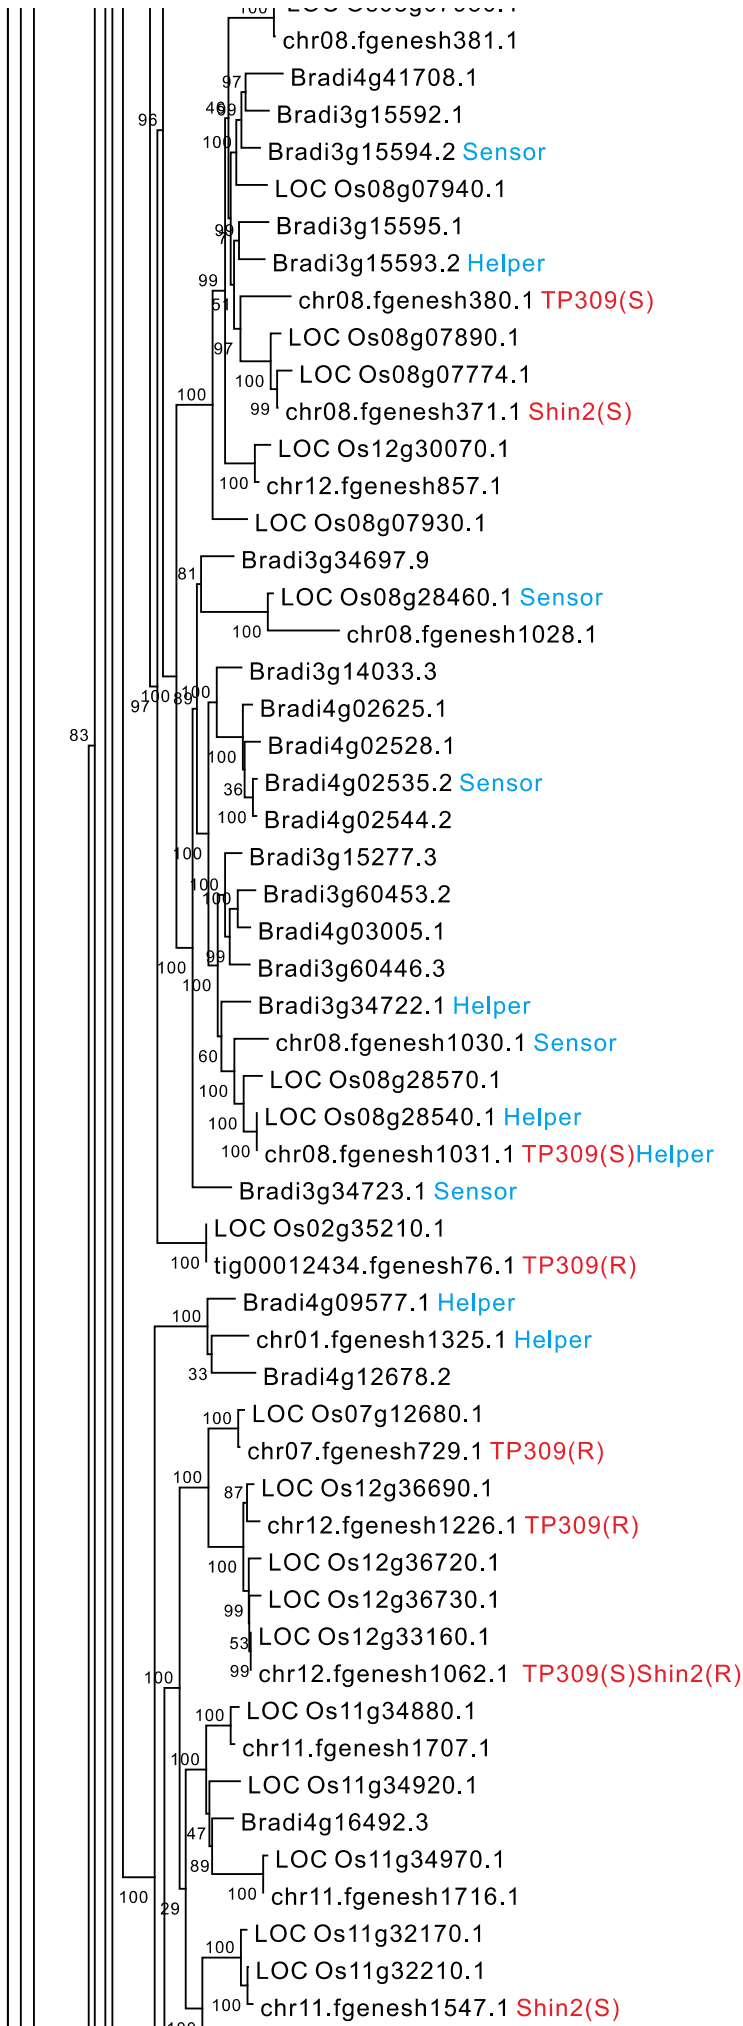



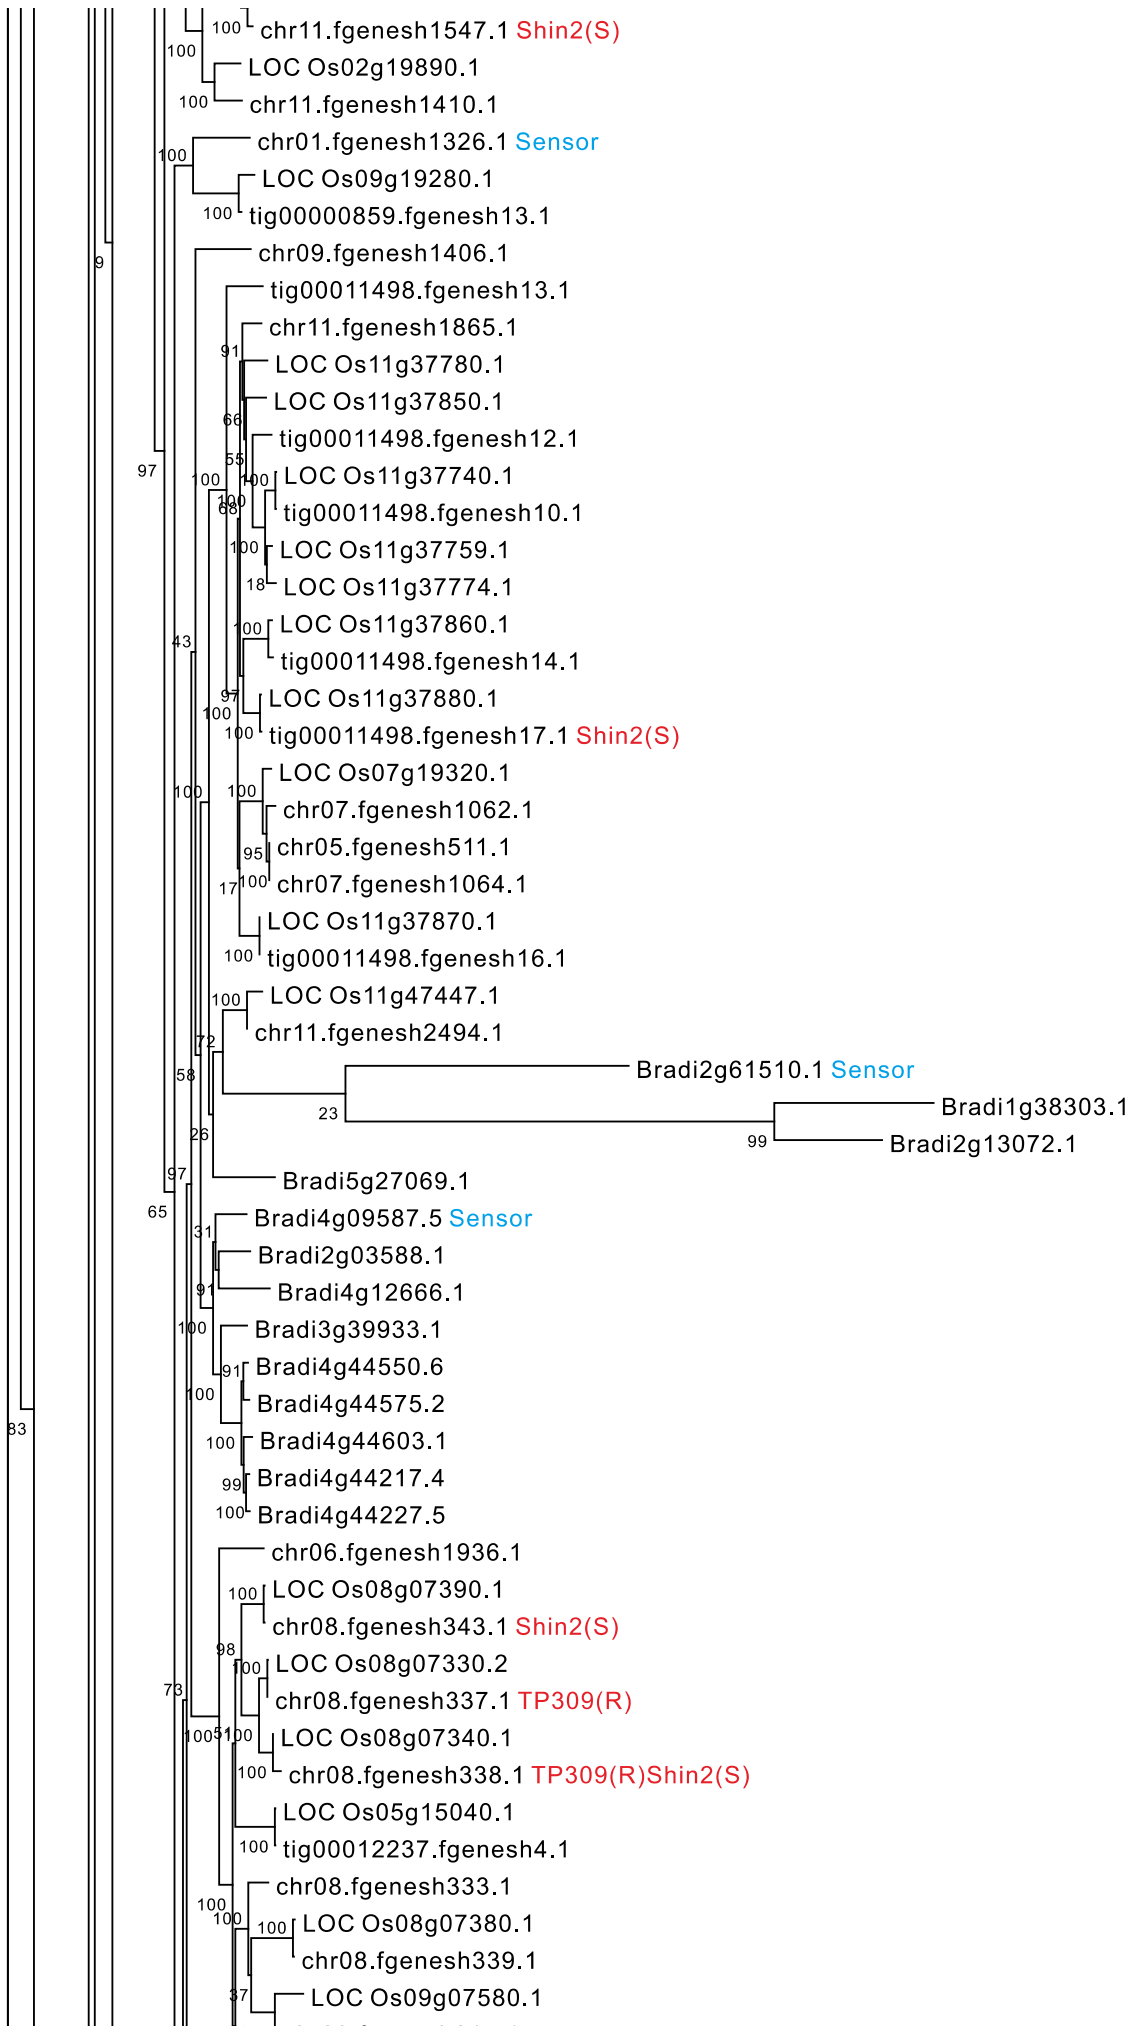

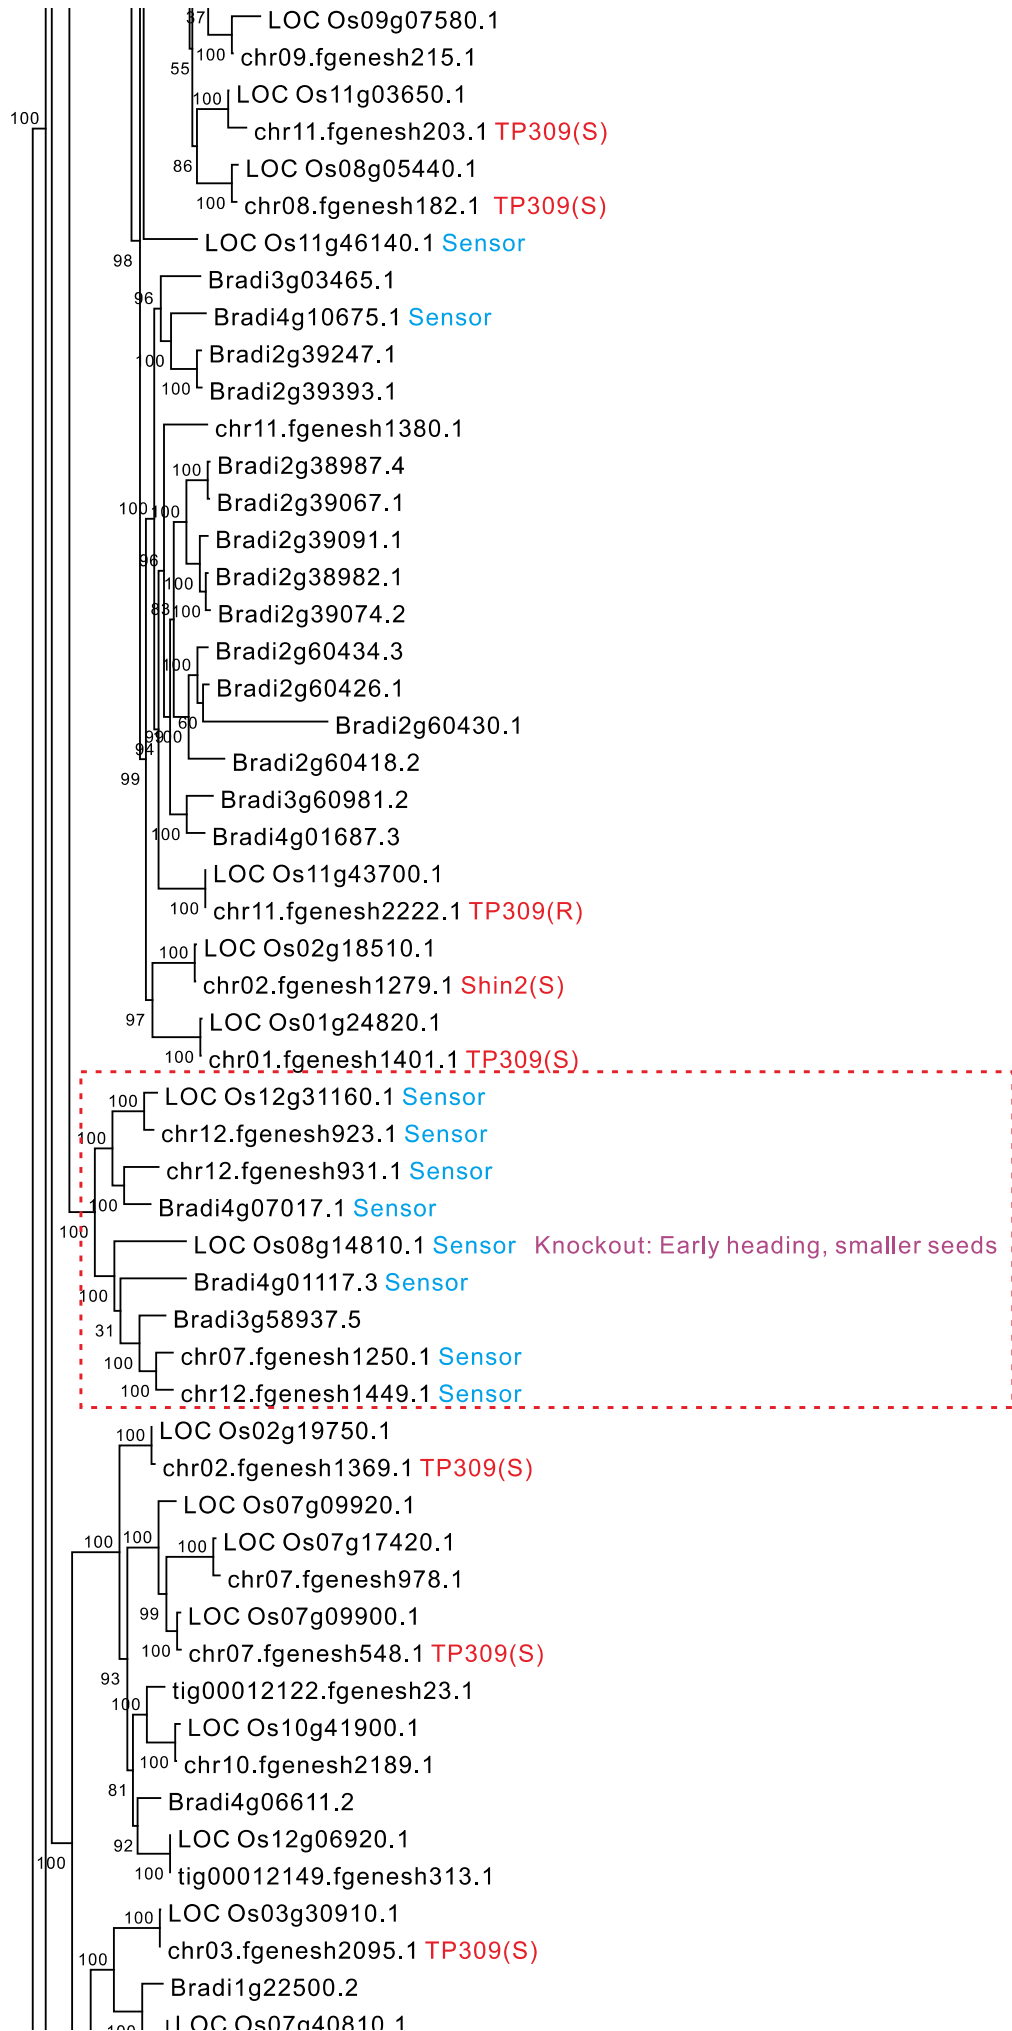

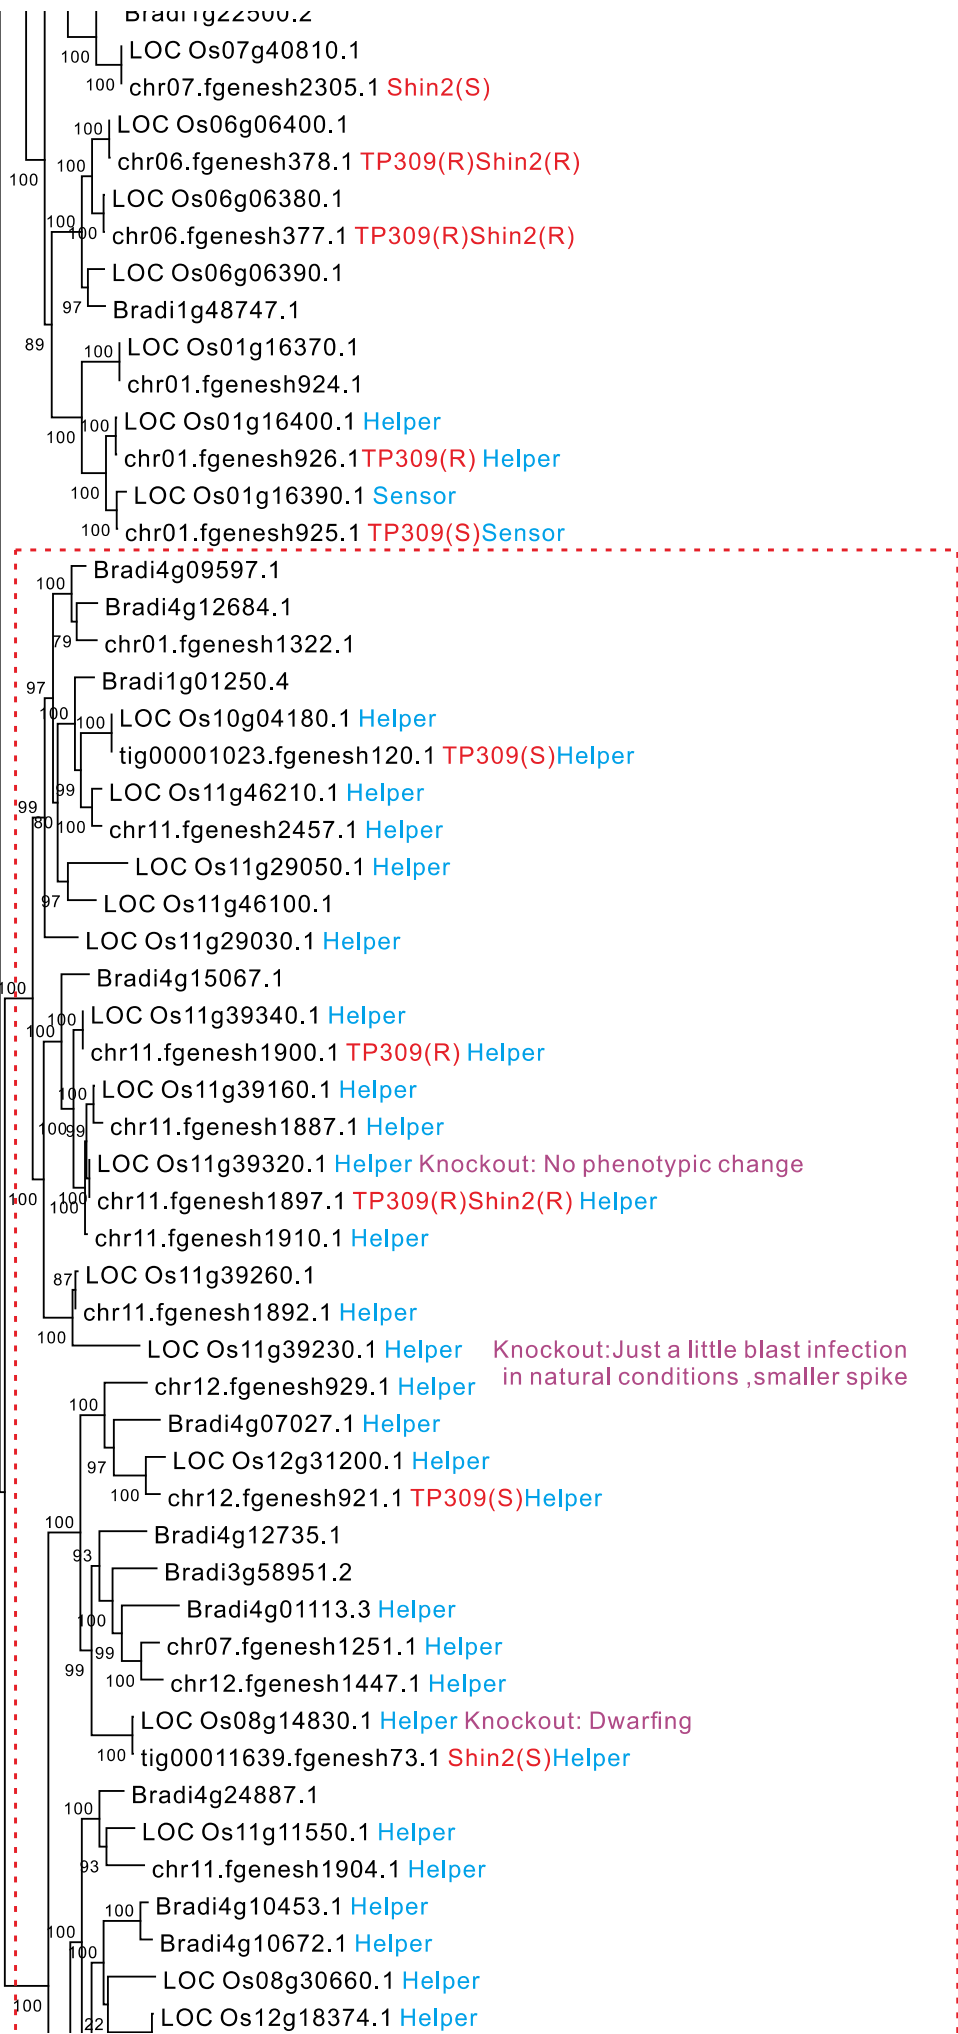

78

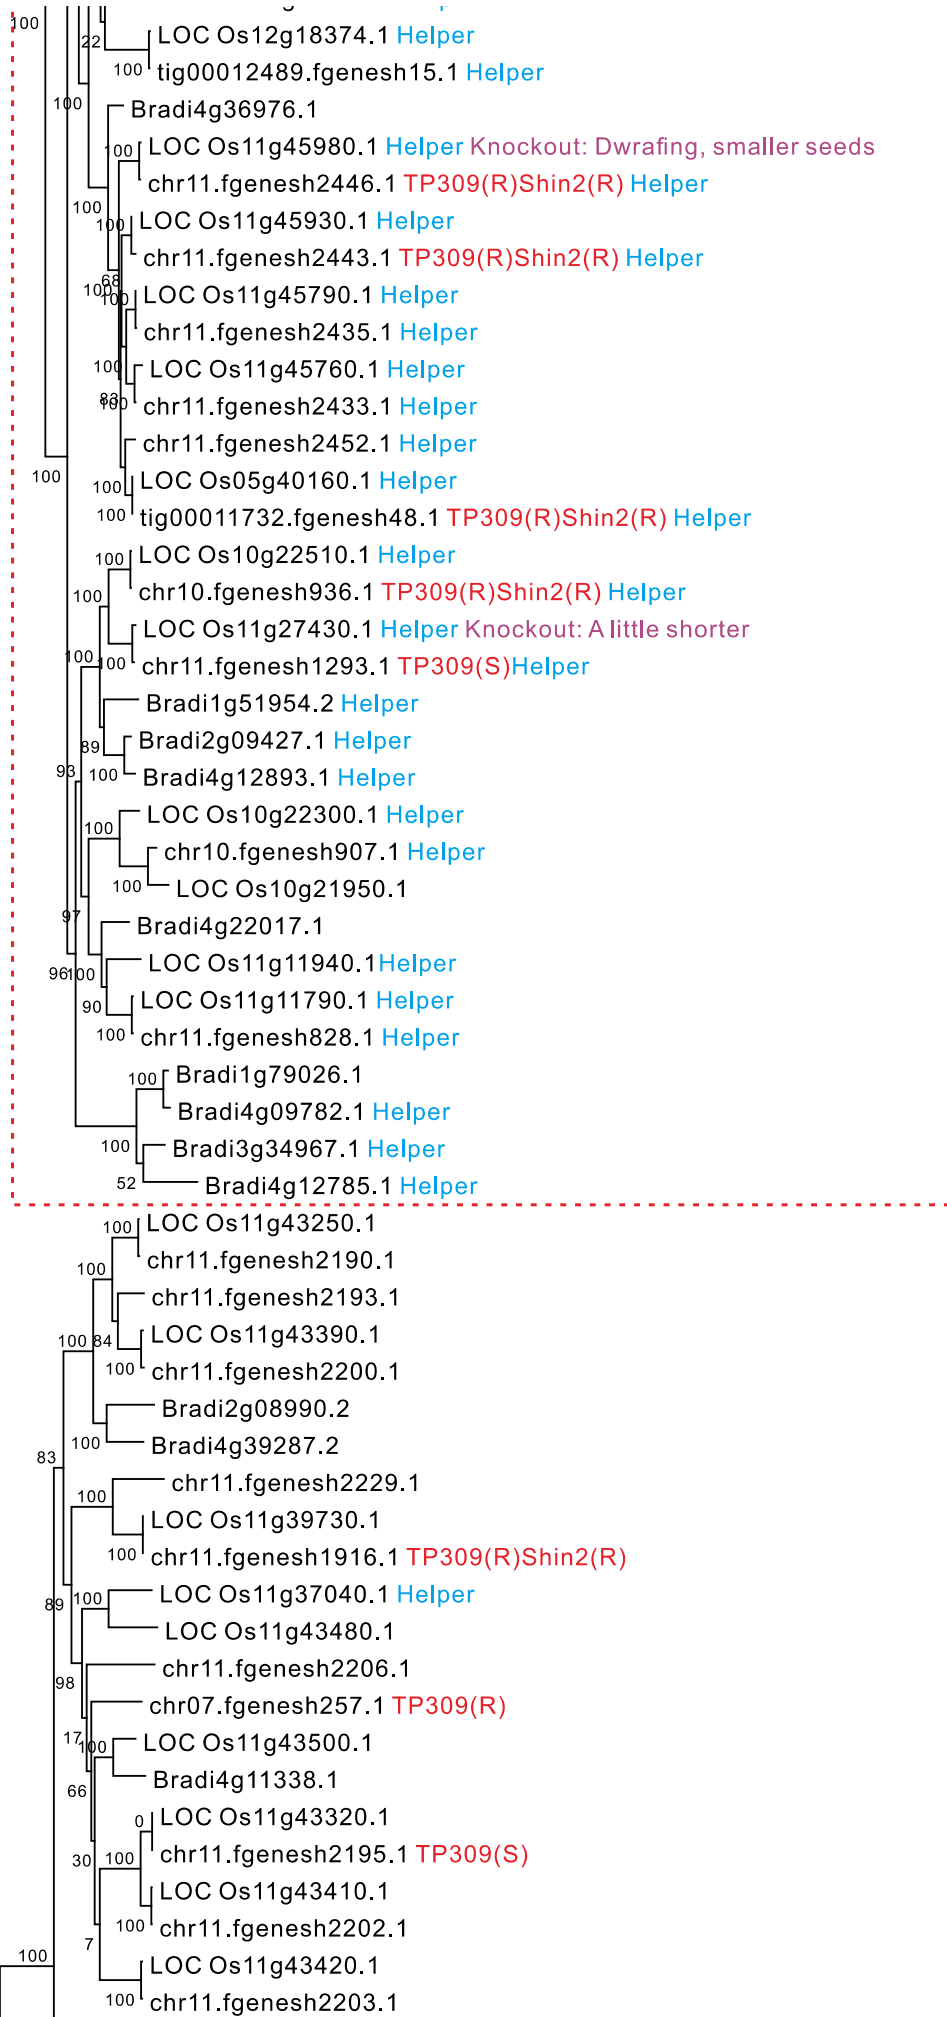

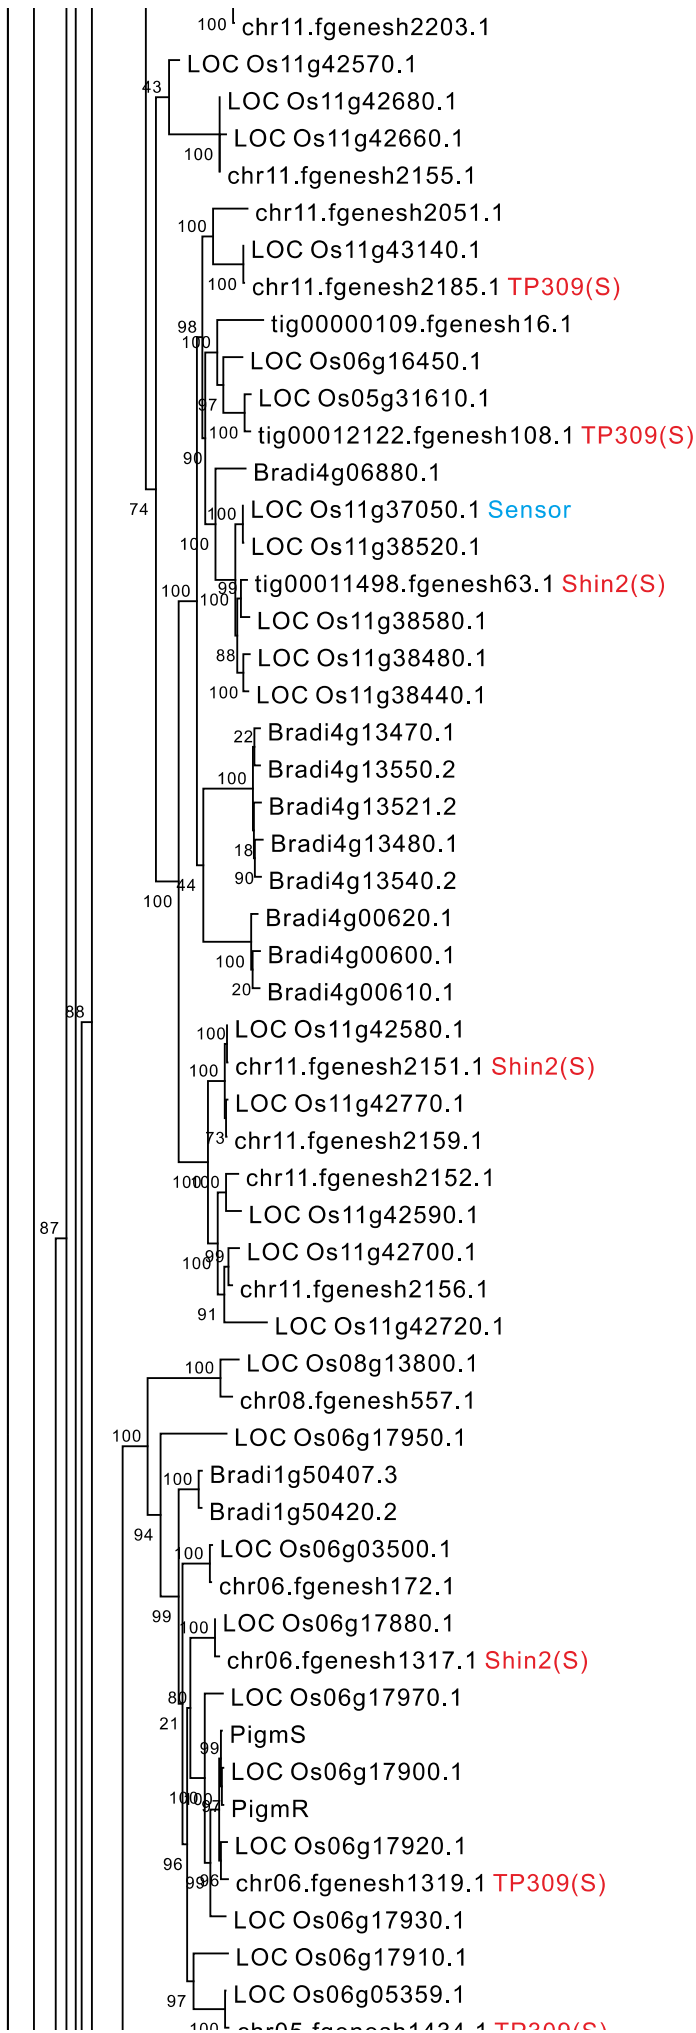

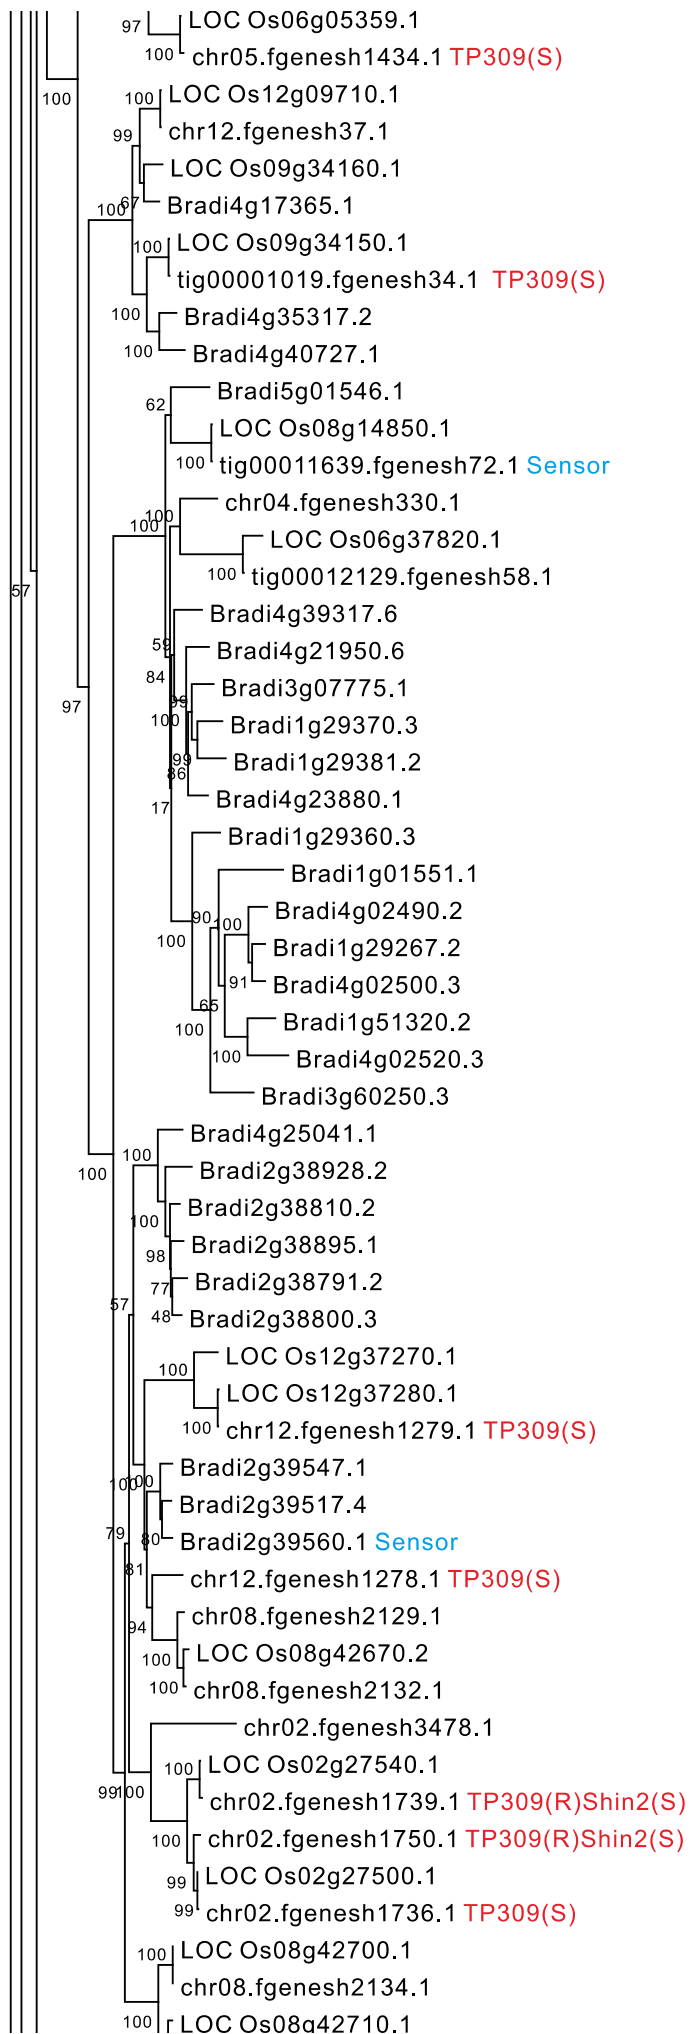

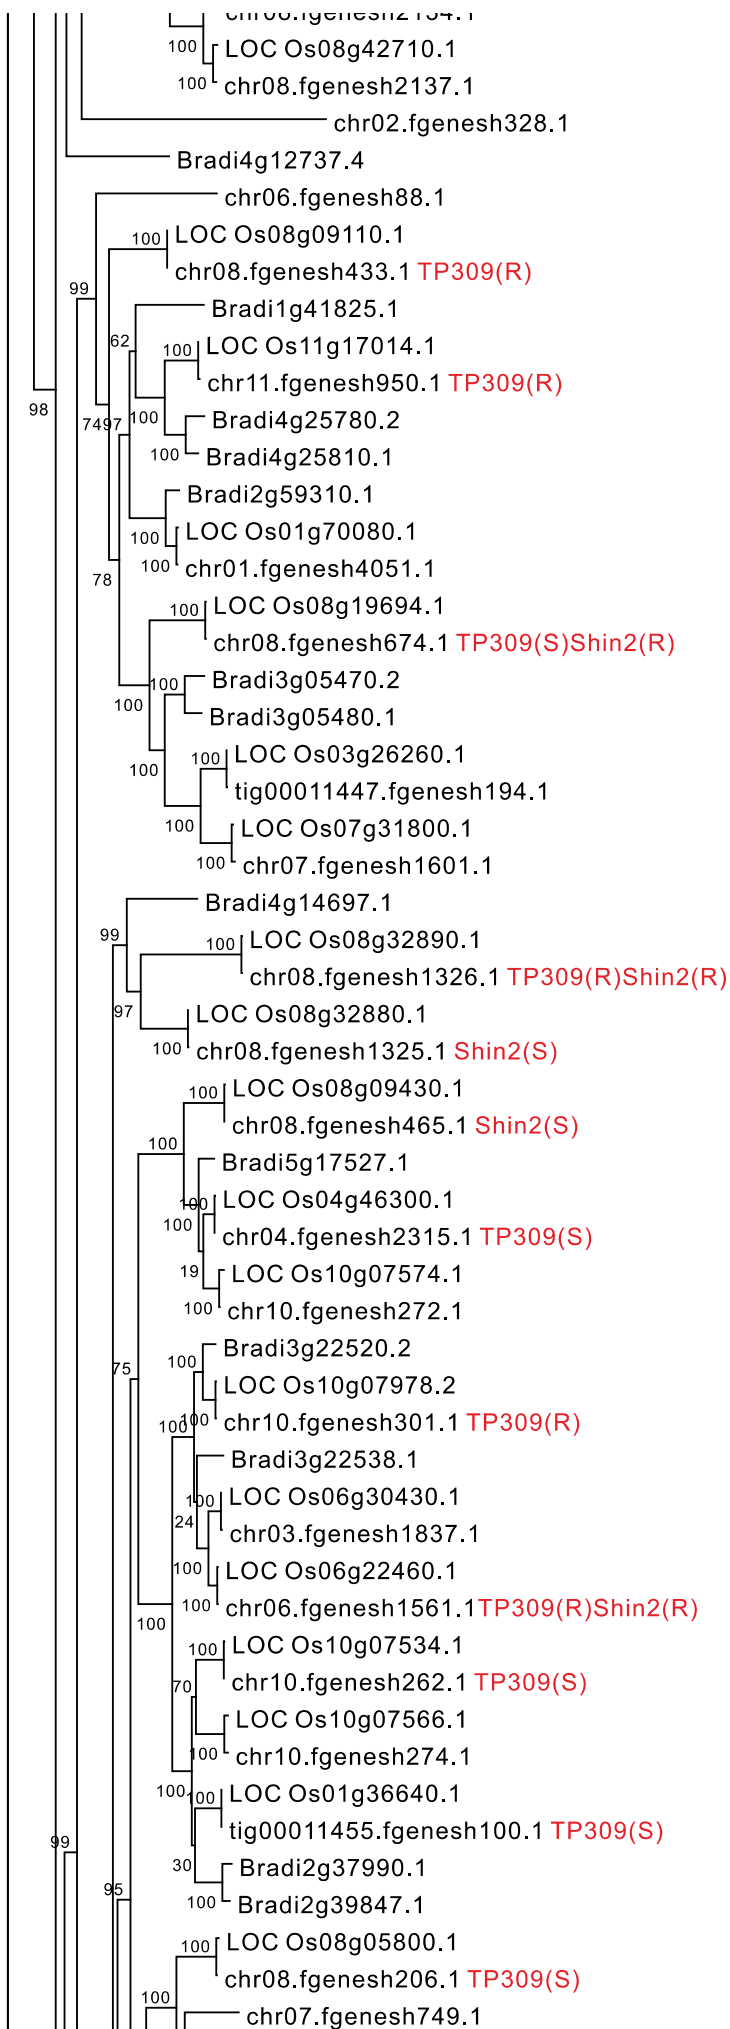

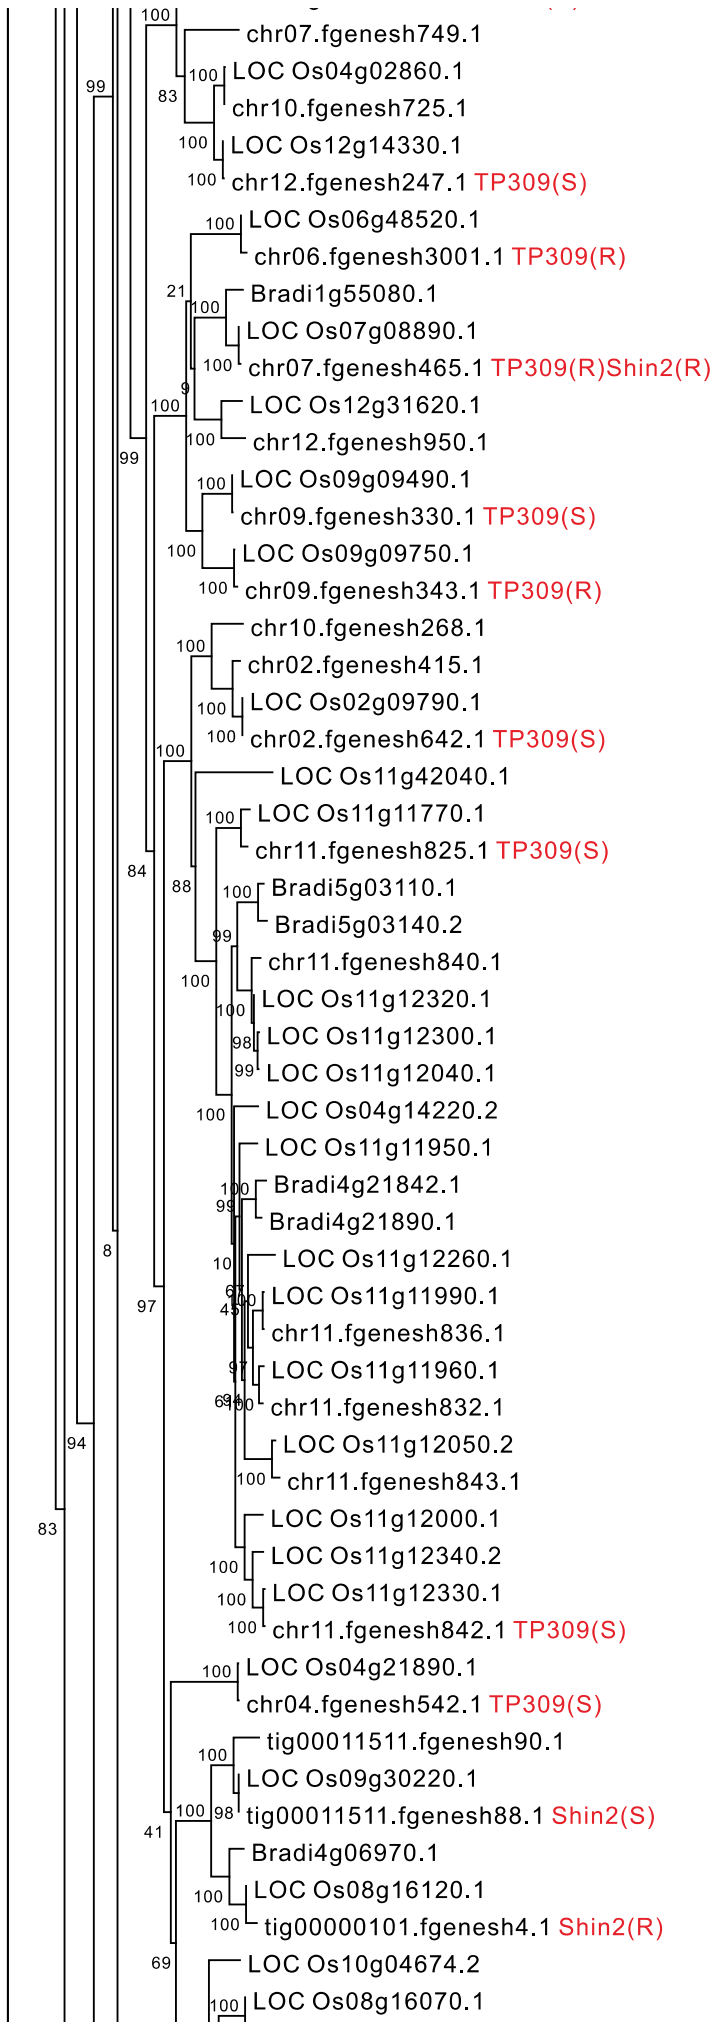



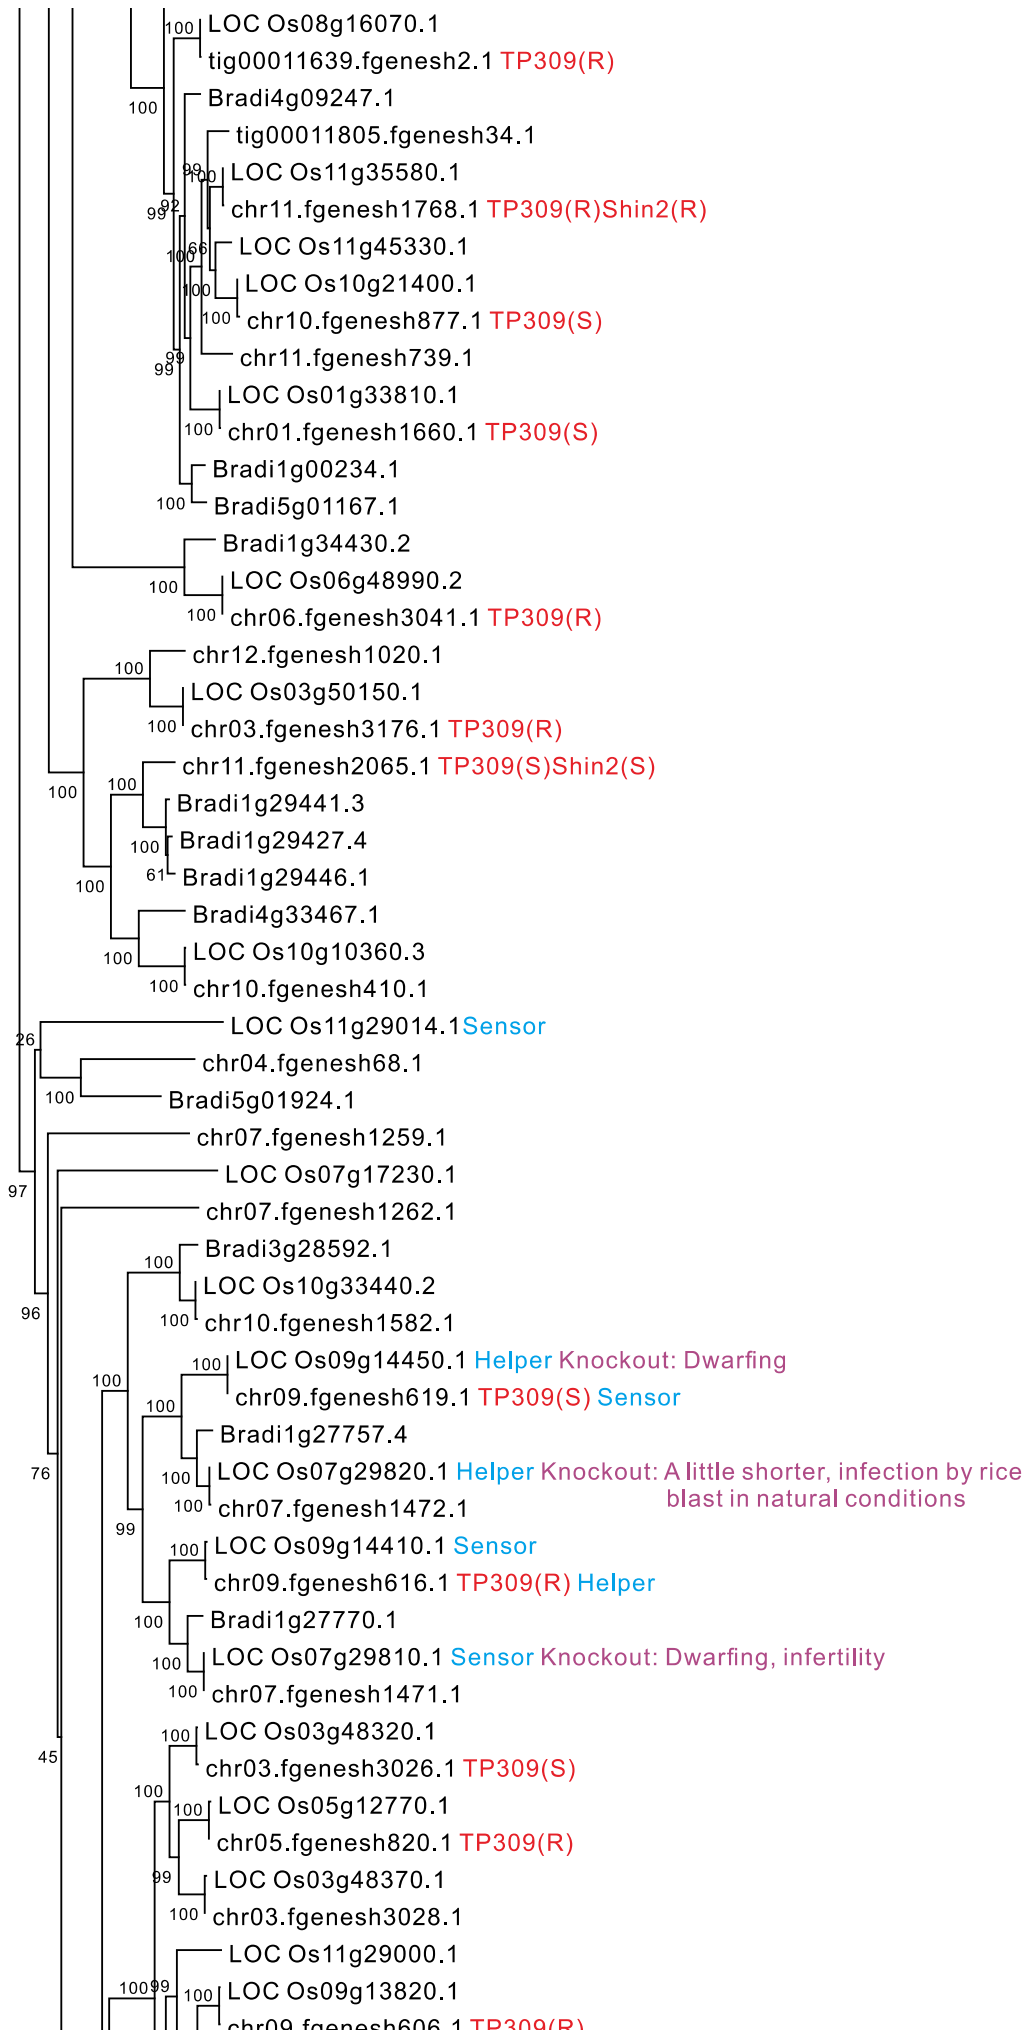

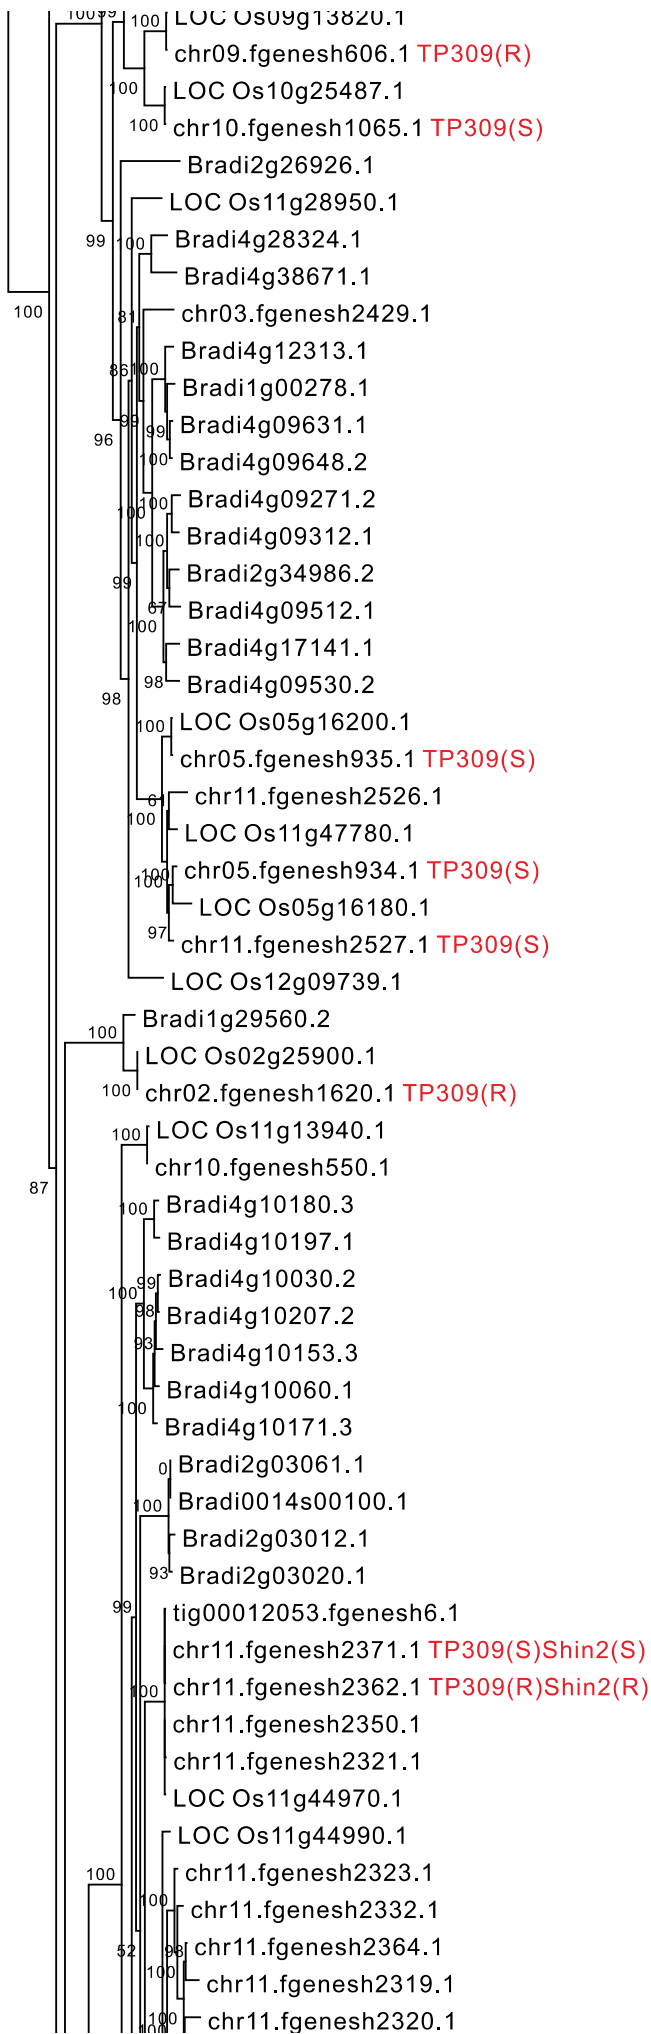

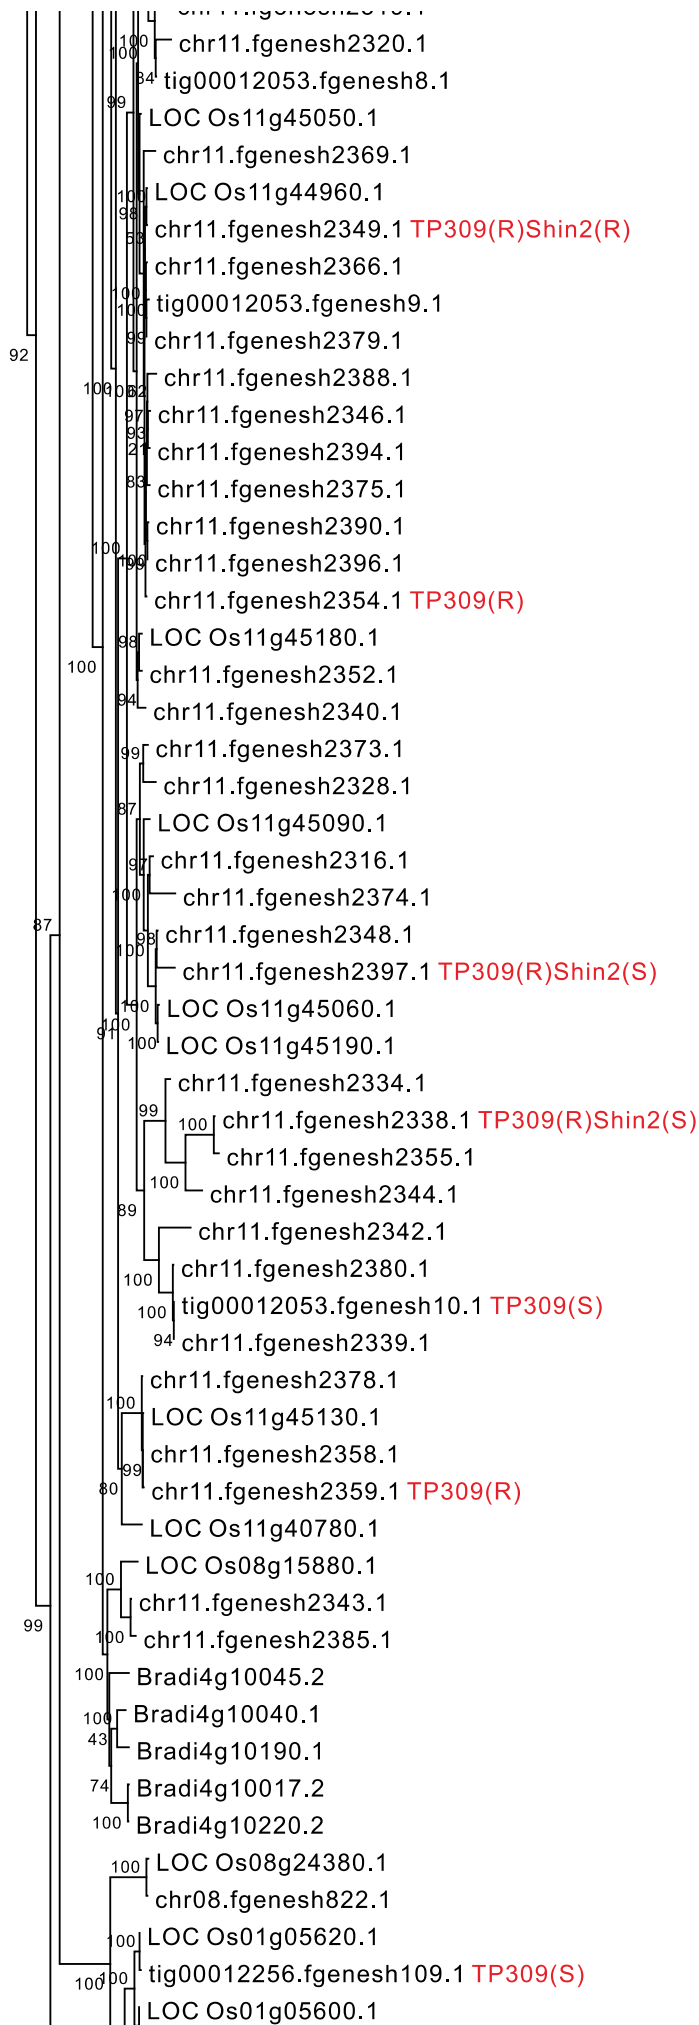

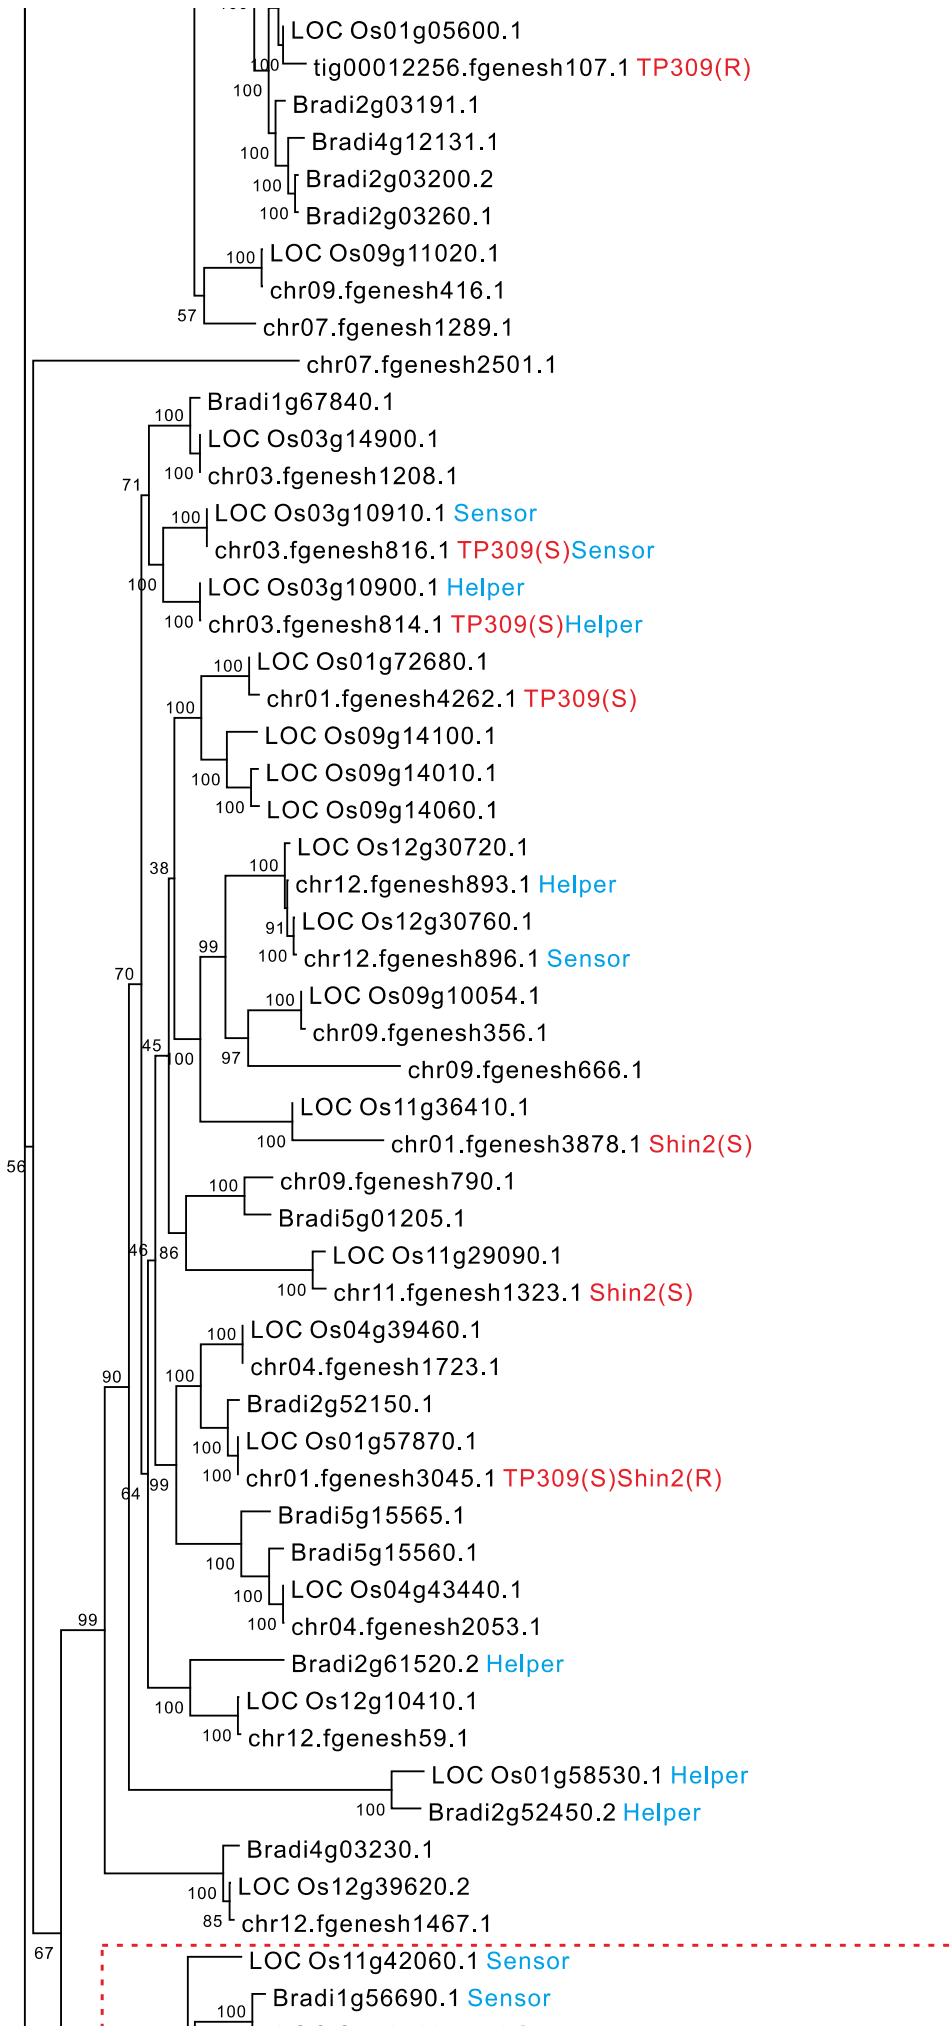

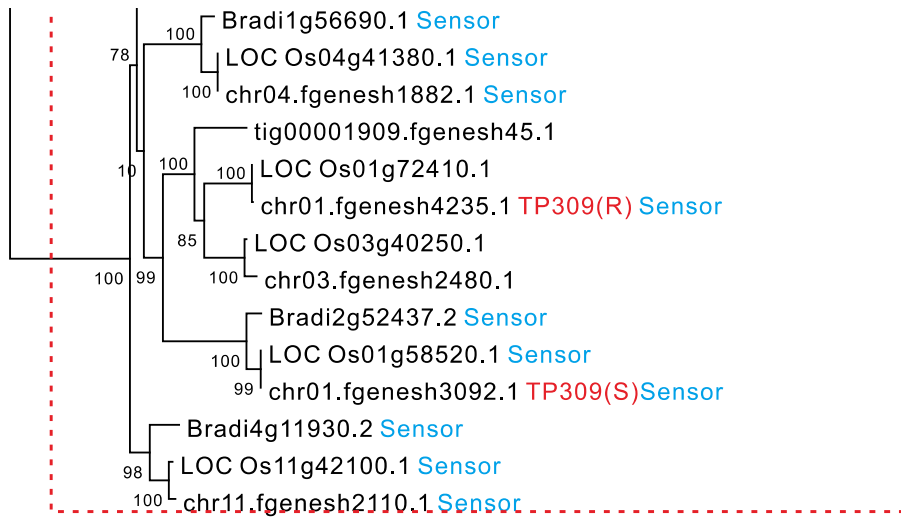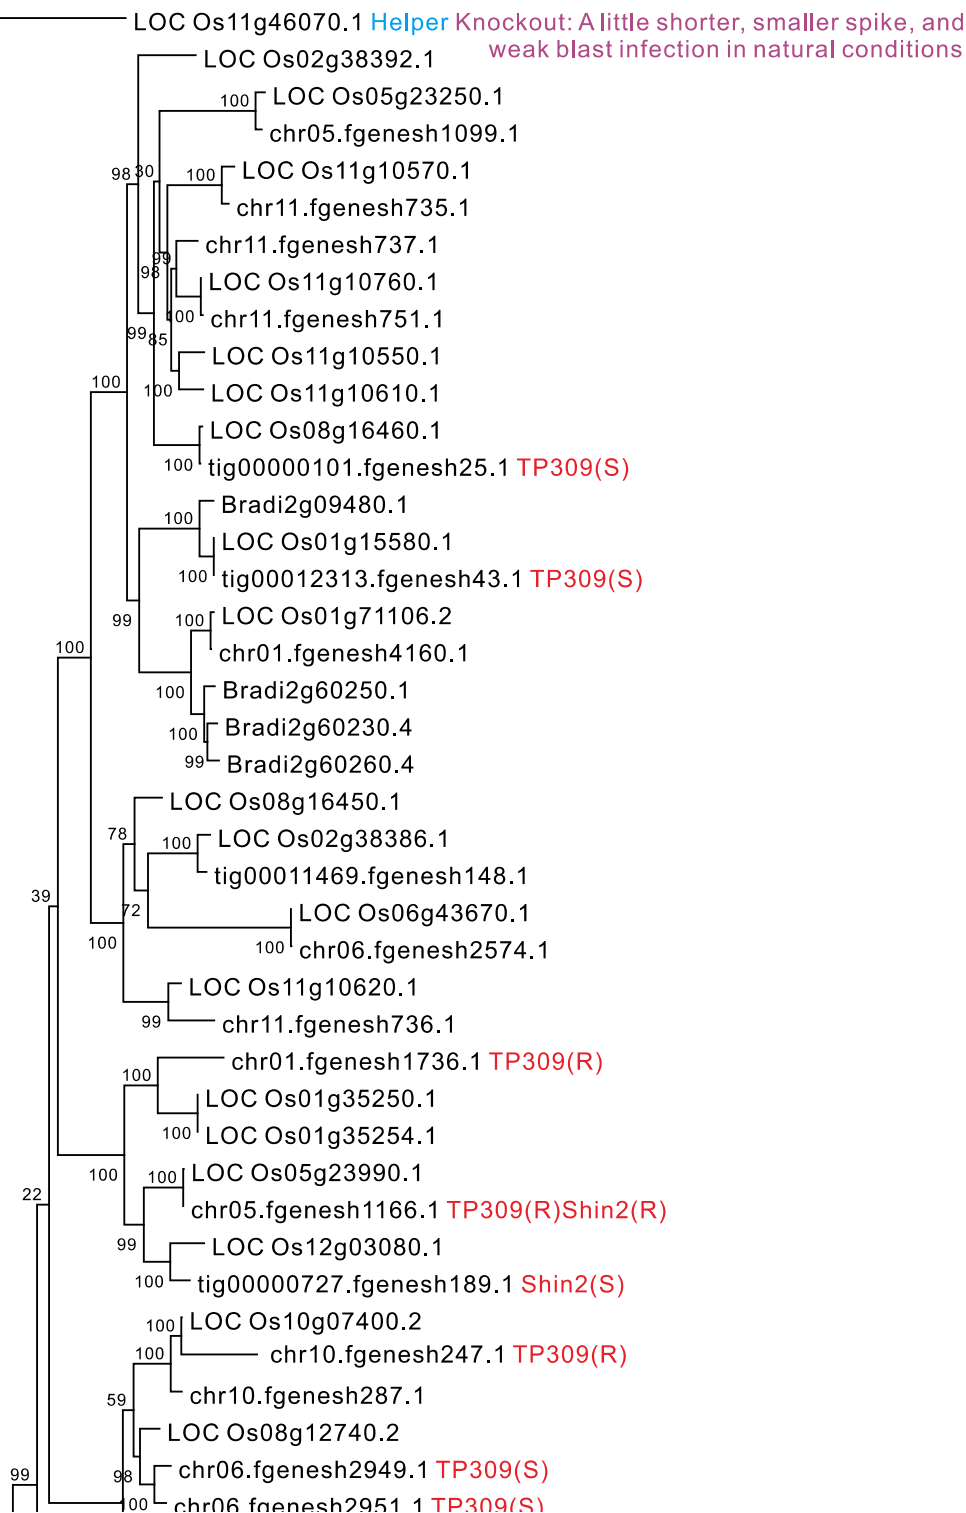

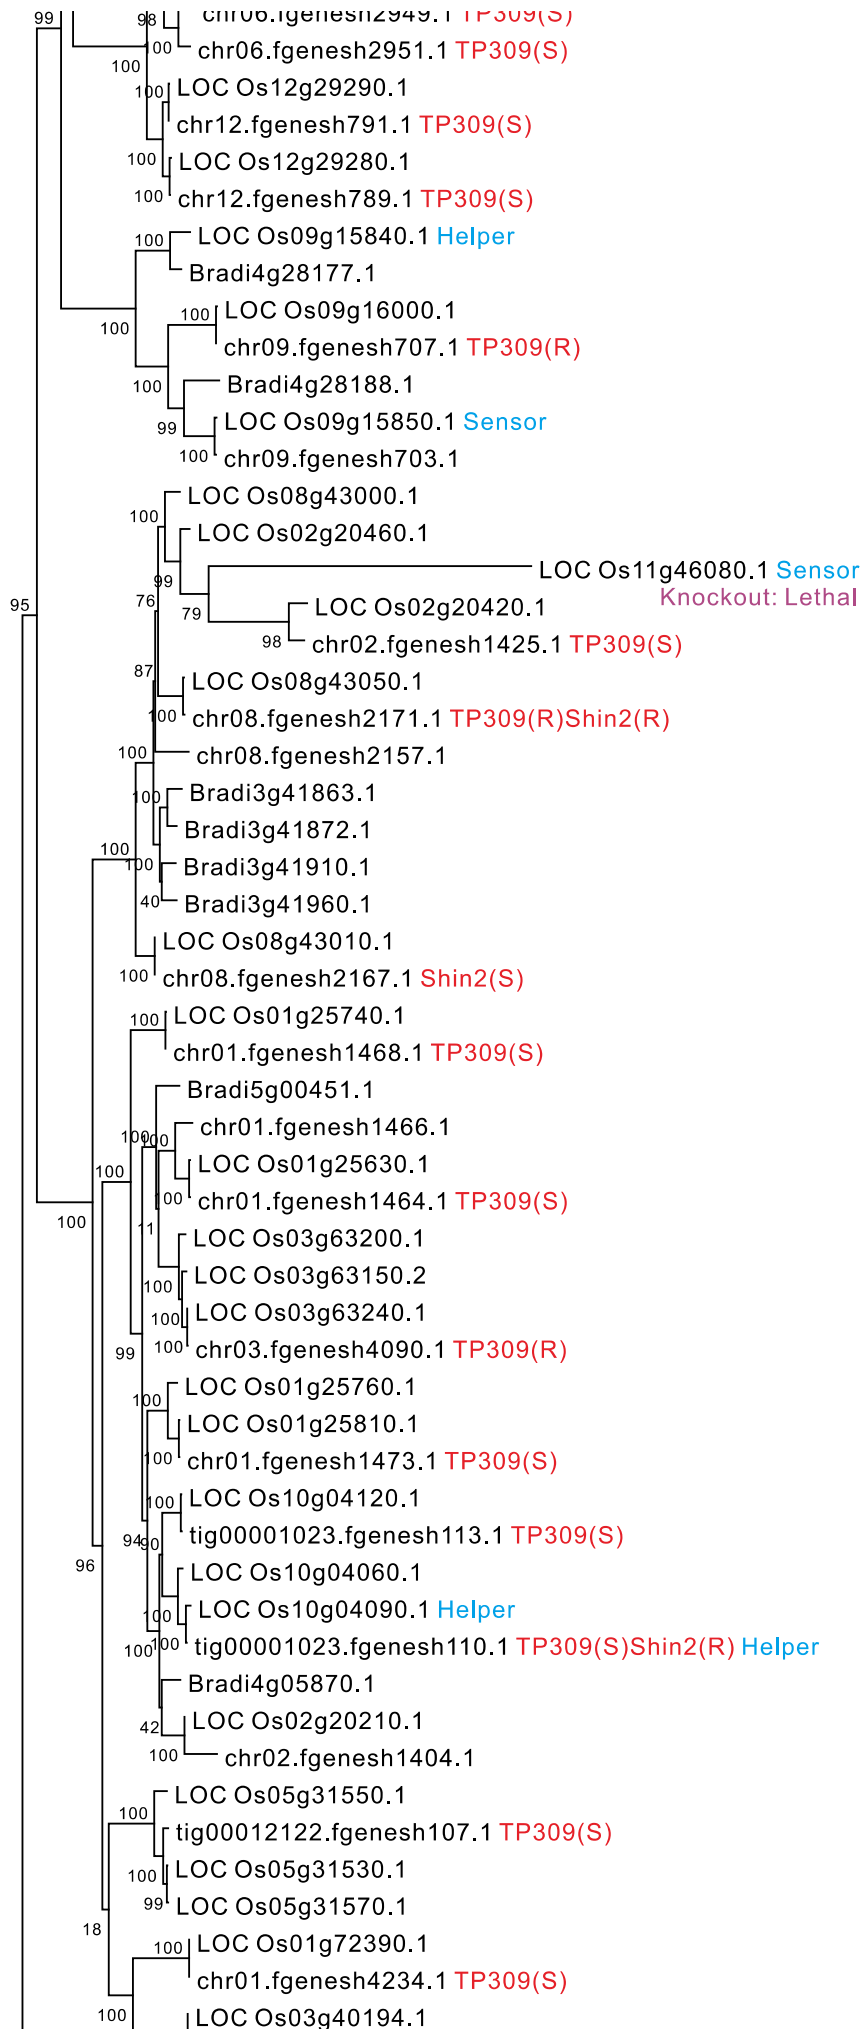

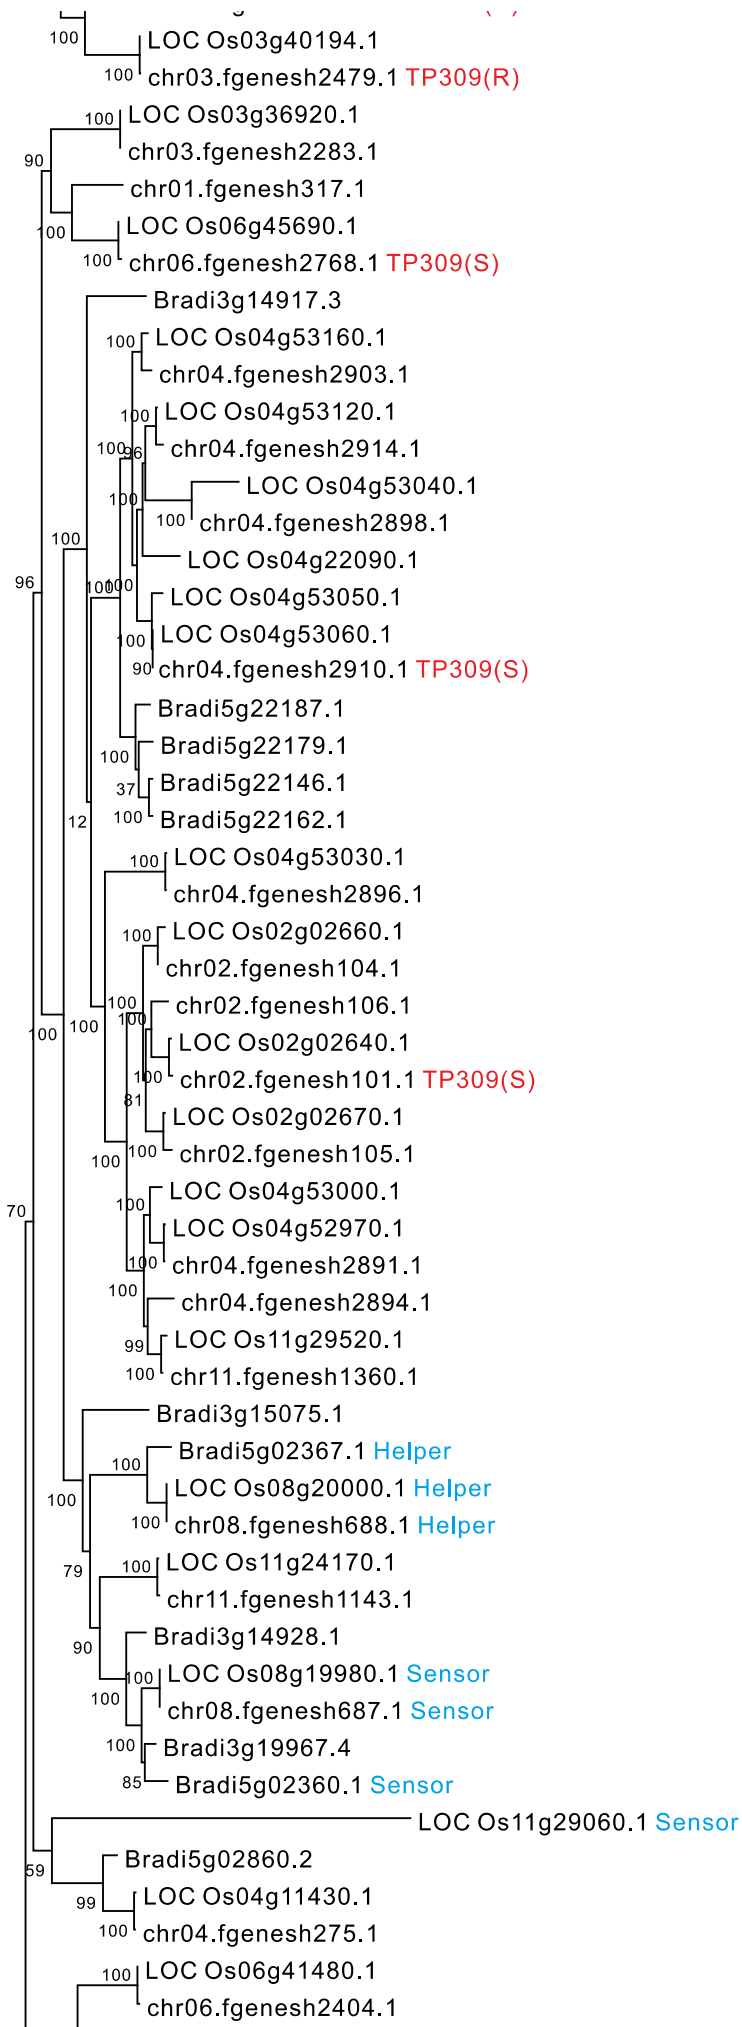

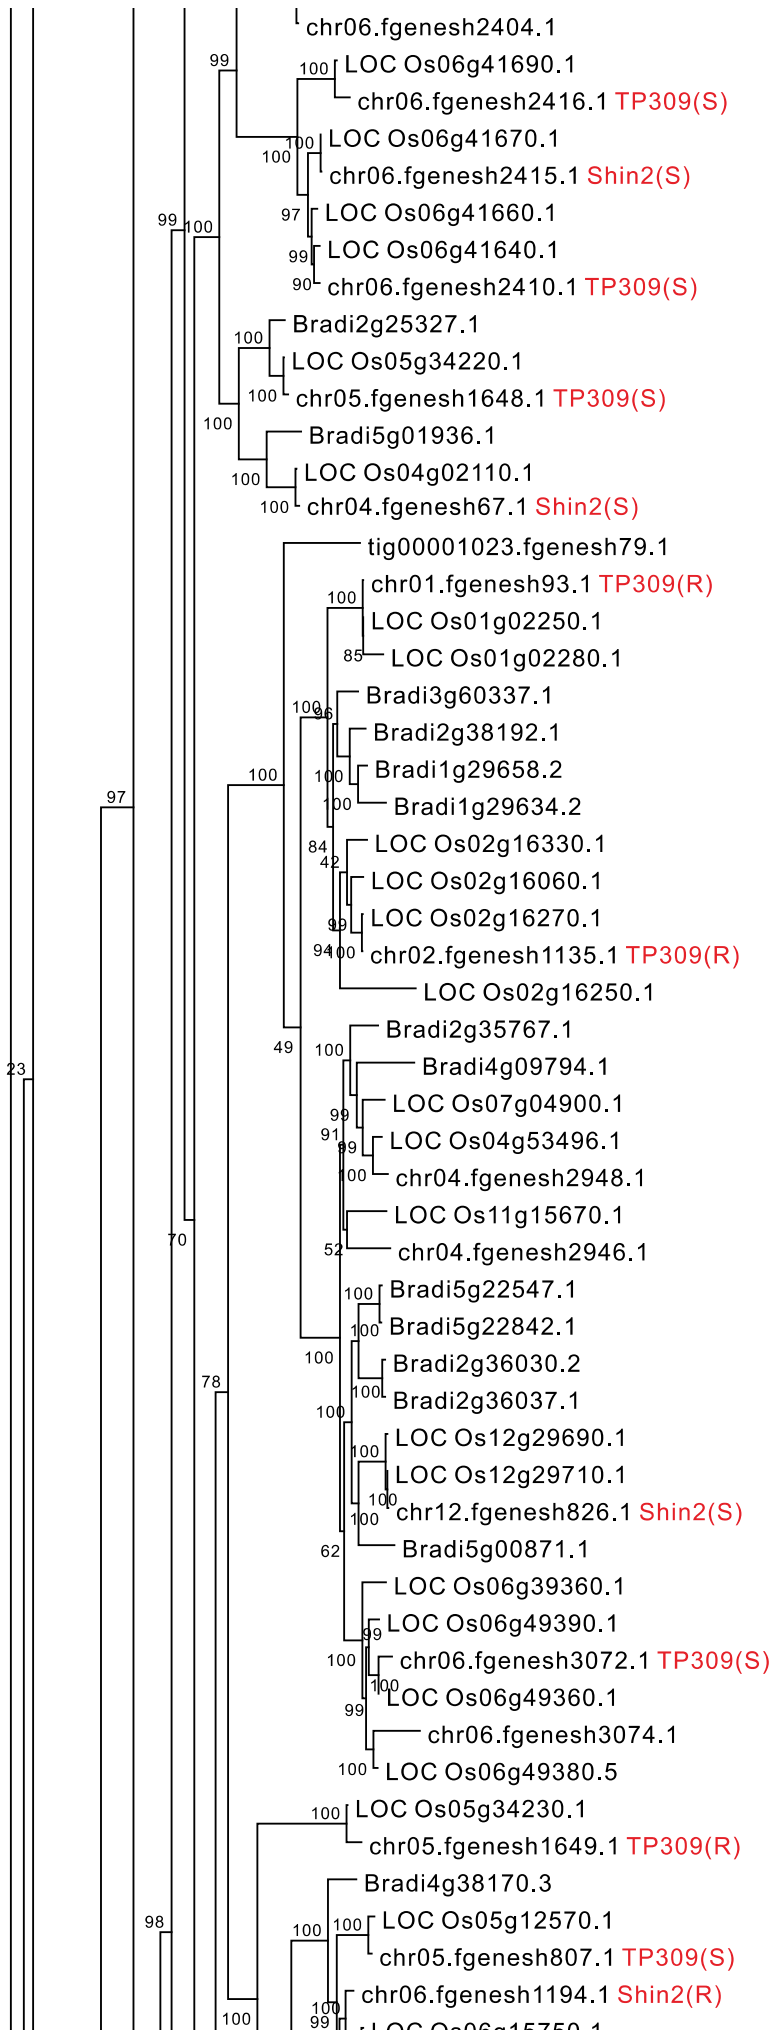



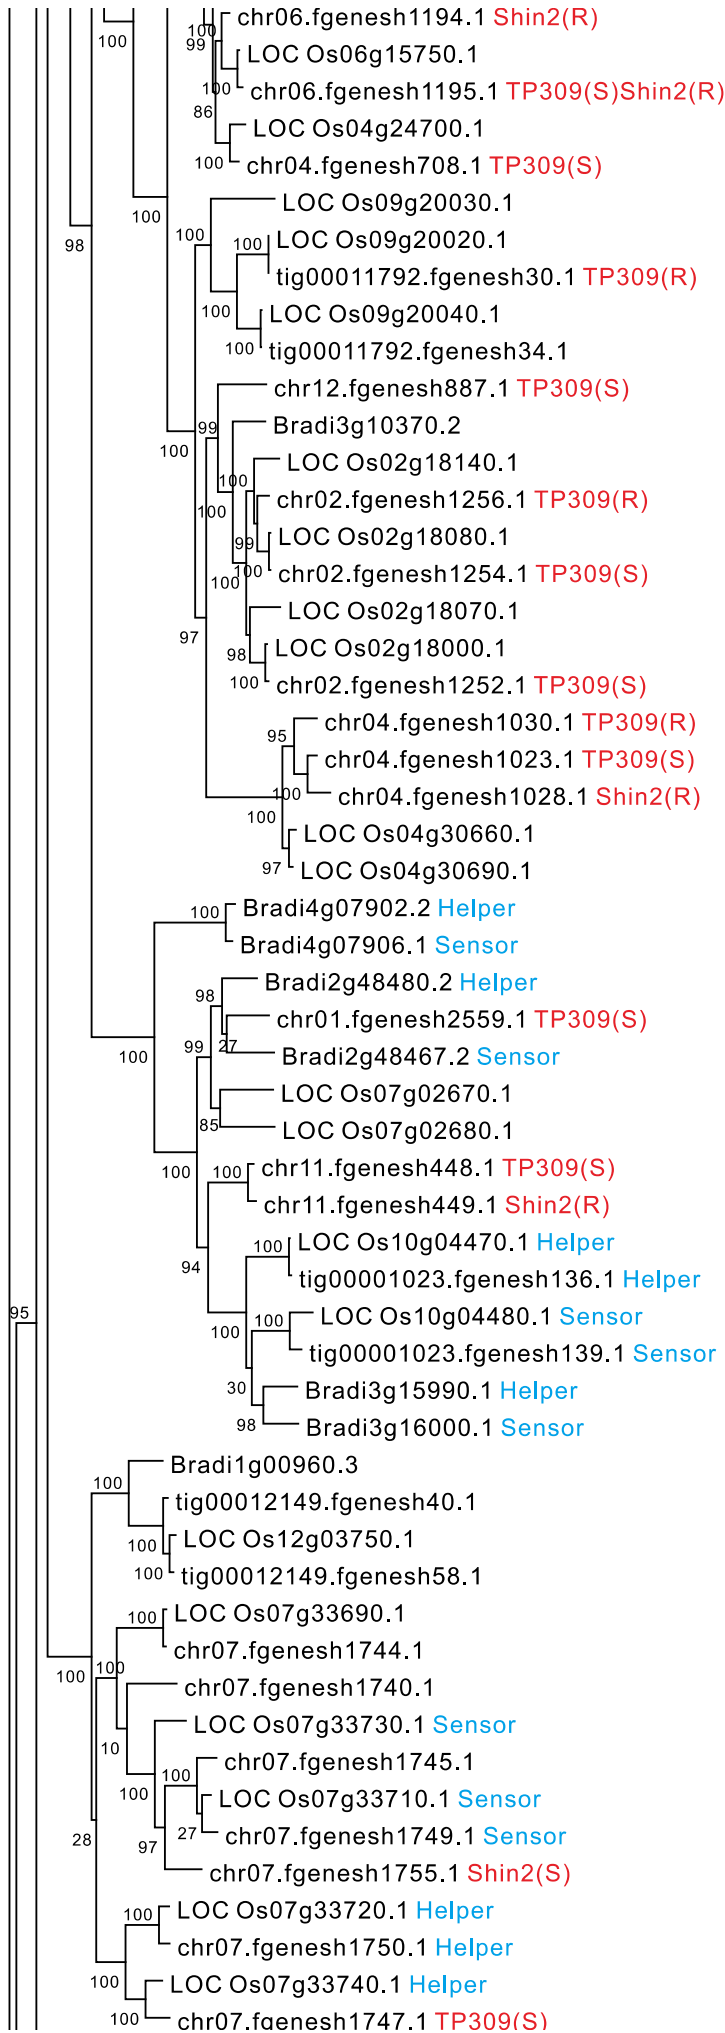

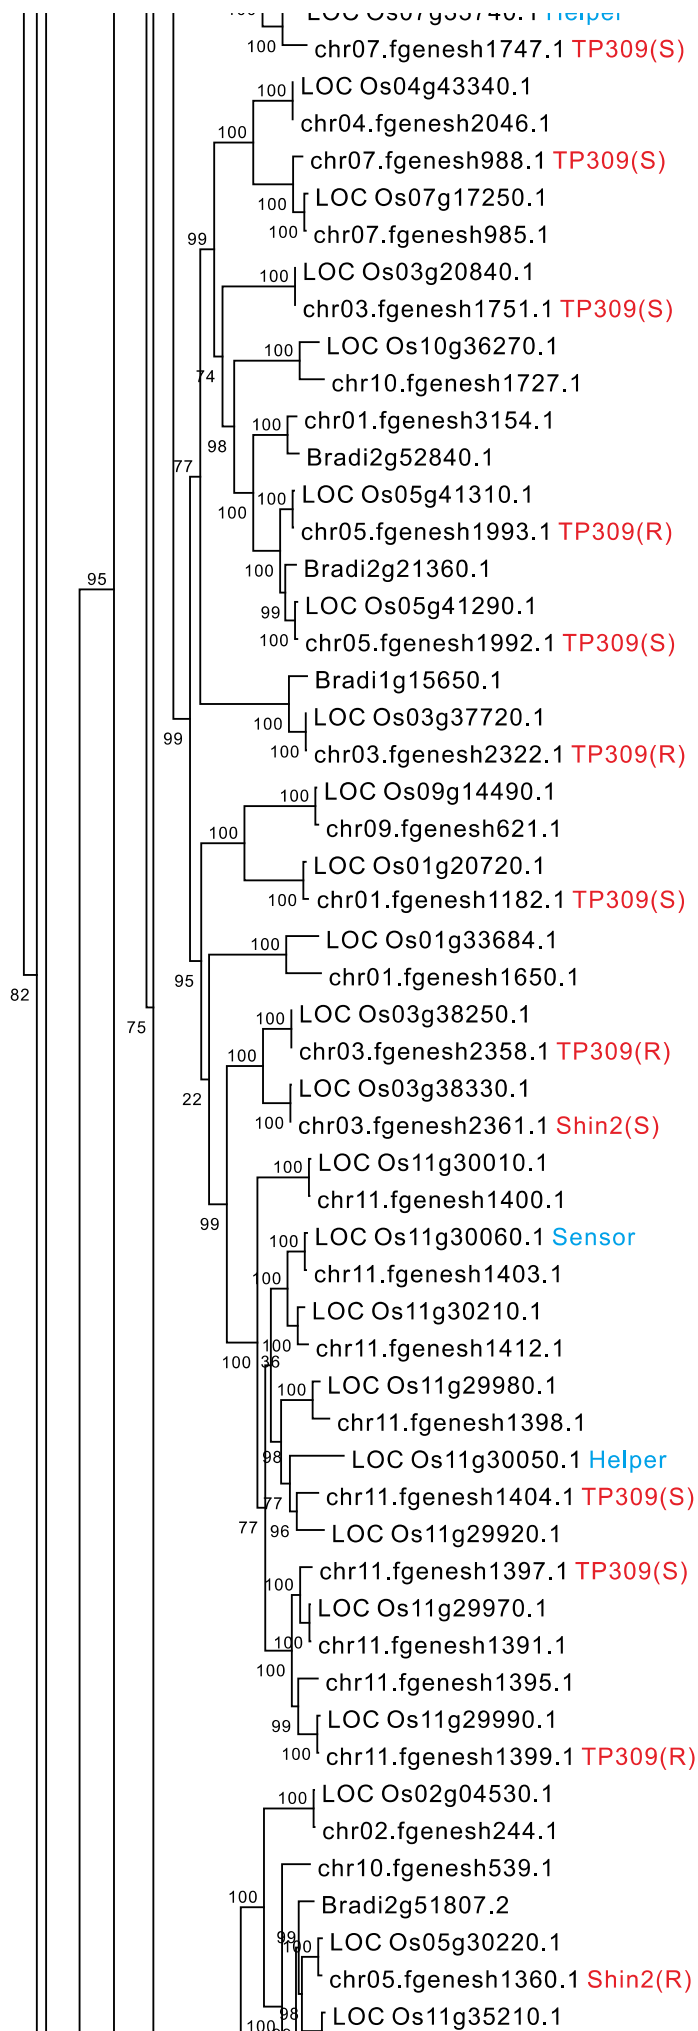

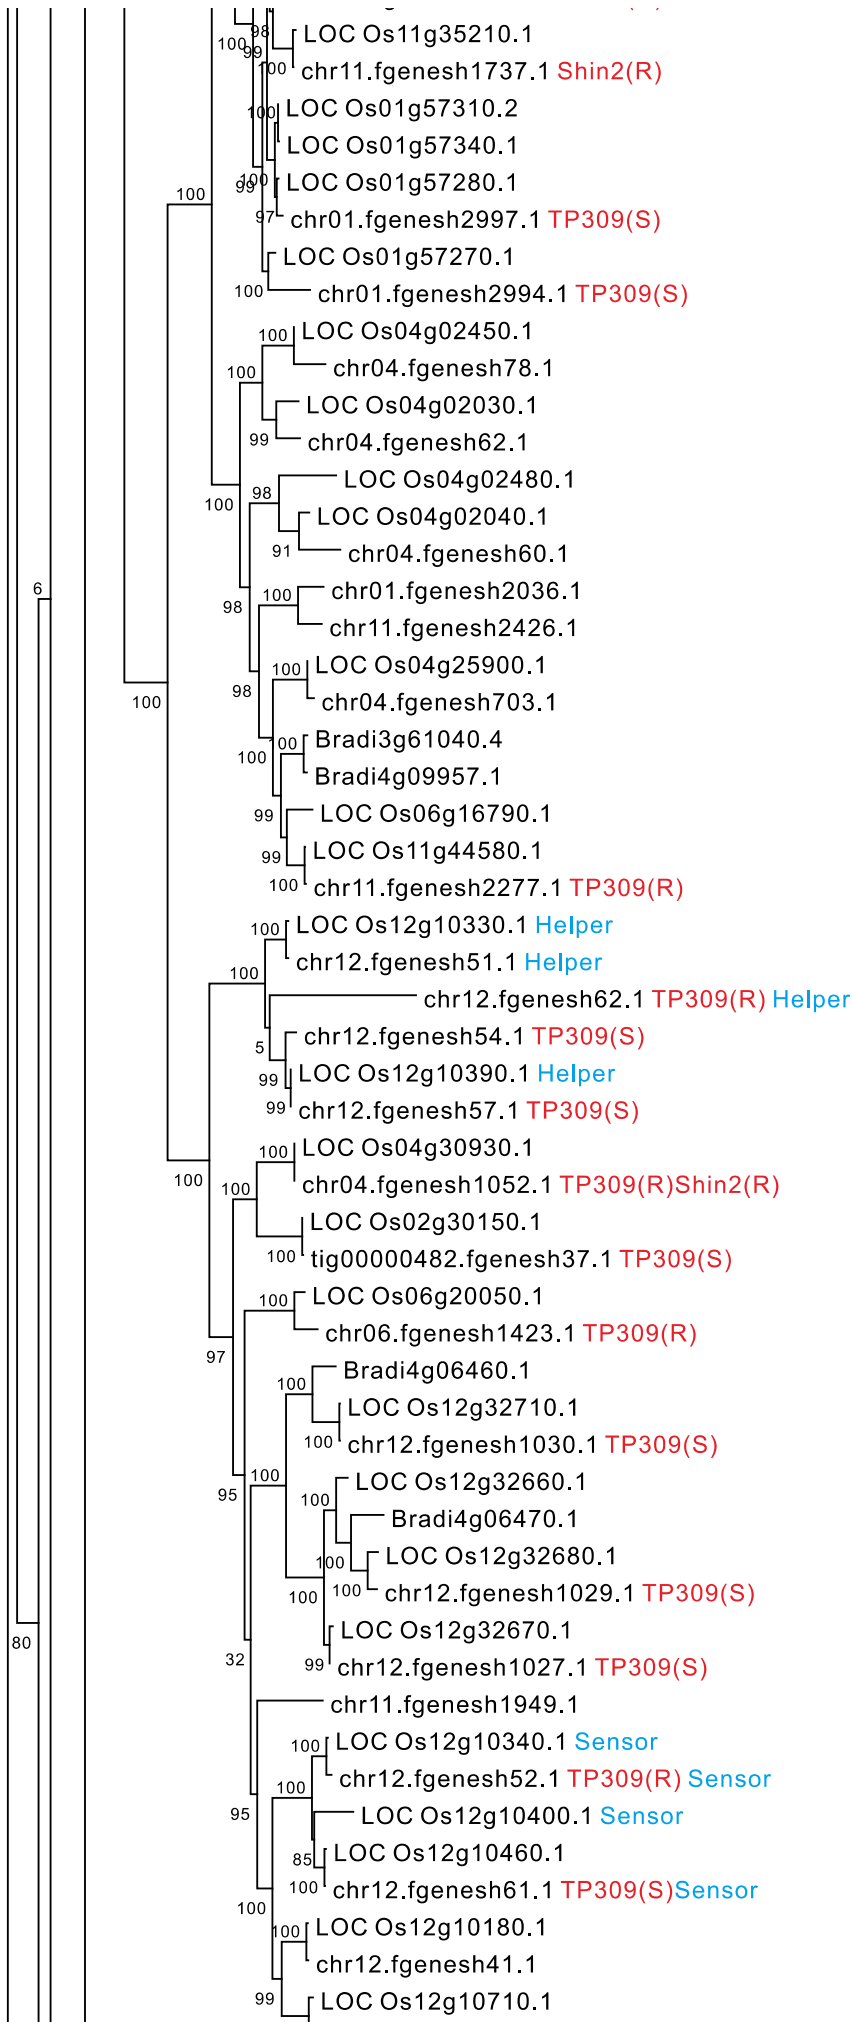

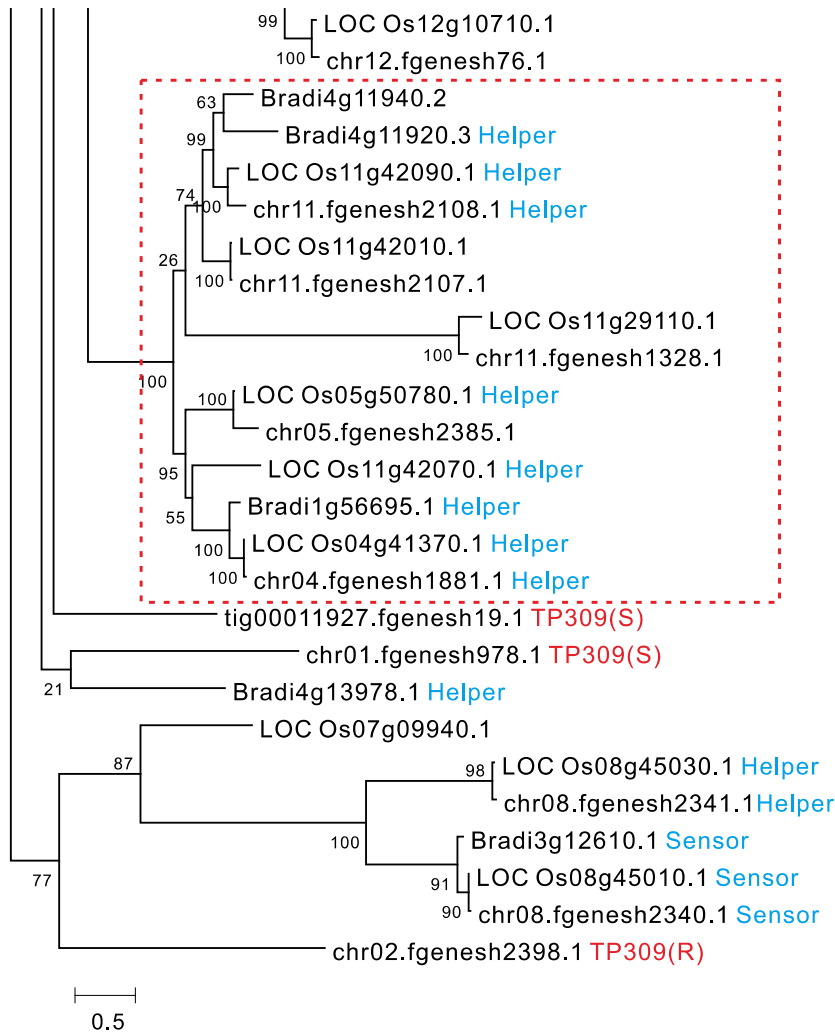

**Fig. S3. Phylogenetic tree of all *NLRs* identified in Tetep (\*.fgenes\*), Nipponbare (LOC\_Os\*) and *B. distachyon* (Brad\*).** This tree was constructed using the protein sequences of NB-ARC domains from all identified *NLRs* by the ML (Maximum Likelihood) method (1000 bootstrap replicates). Those paired-*NLR* clades shown in Fig. 4 and 6 are shown in red dashed rectangles. A tested *NLR* is presented as TP309 (R) [Shin2 (R)], if it is resistant to at least one tested blast pathogen isolate when transformed into TP309 (Shin2) or as TP309 (S) [Shin2 (S)], if it is susceptible to all tested blast pathogen isolates when transformed into TP309 (Shin2). A short description of the phenotypic changes in CRISPR/Cas9 mutants are also given for each investigated *NLR*. A sensor (helper) was classified by its homologous relationship with sensor (helper) members of known *NLR* pairs. If this definition could not be made, we checked whether it carries an extra domain that might recognize pathogens, e.g. WRKY, RATX, NOI, and TRX, which could act as a decoy of pathogen effectors. The *NLR* will be classified as a sensor if yes, but a helper if not.

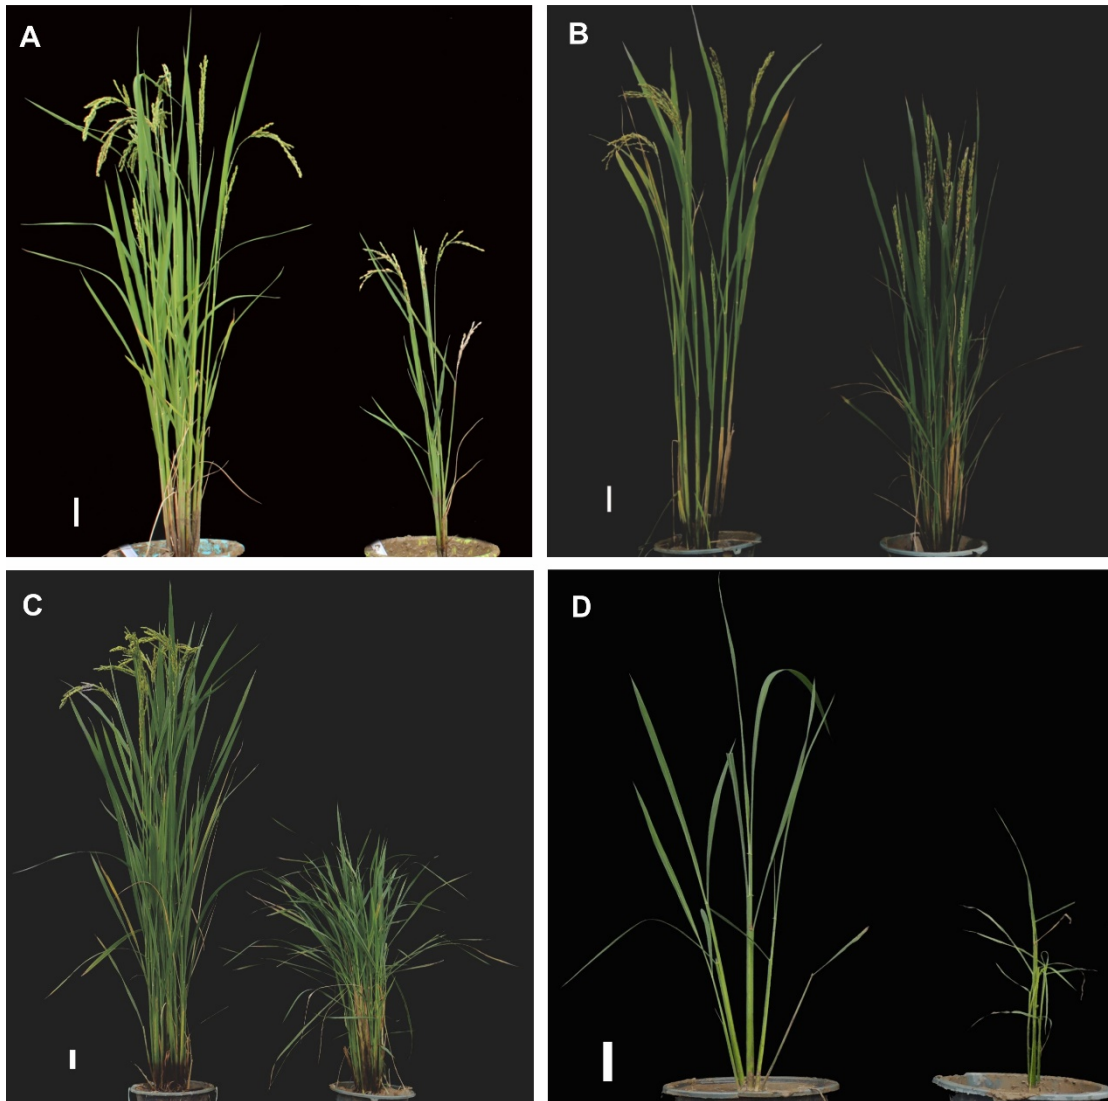

**Fig. S4. Phenotypes of Tetep *NLR* transformants.** (A) TP309 transformant of *chr11.fgenes2446*. Left: wild type; right: T<sub>1</sub> transformant. The transgenic lines displayed shortened statures compared to WT. ~80 days old plants. (B) TP309 transformant of a highly resistant *NLR chr11.fgenes2443*. Left: wild type; right: T<sub>1</sub> transformant. ~90 days old plants. The transgenic lines displayed dwarfism and generally had a low seed-setting rate compared to WT. Few seeds could be successfully germinated from these transformants. (C) TP309 transformant of *chr10.fgenes935*. Left: wild type; right: T<sub>0</sub> transformant. The transgenic lines displayed dwarf phenotypes and low seed-setting rates. 70 days old plants. (D) Shin2 transformant of *chr11.fgenes829 (RGA5)*. Left: wild type; right: T<sub>0</sub> transformant. The transgenic lines displayed retarded growth compared to WT. 19 days old plants. No transgenic lines were obtained for its helper counterpart *chr11.fgenes828 (RGA4)* after all transformation trails. Scale bars = 5 cm.

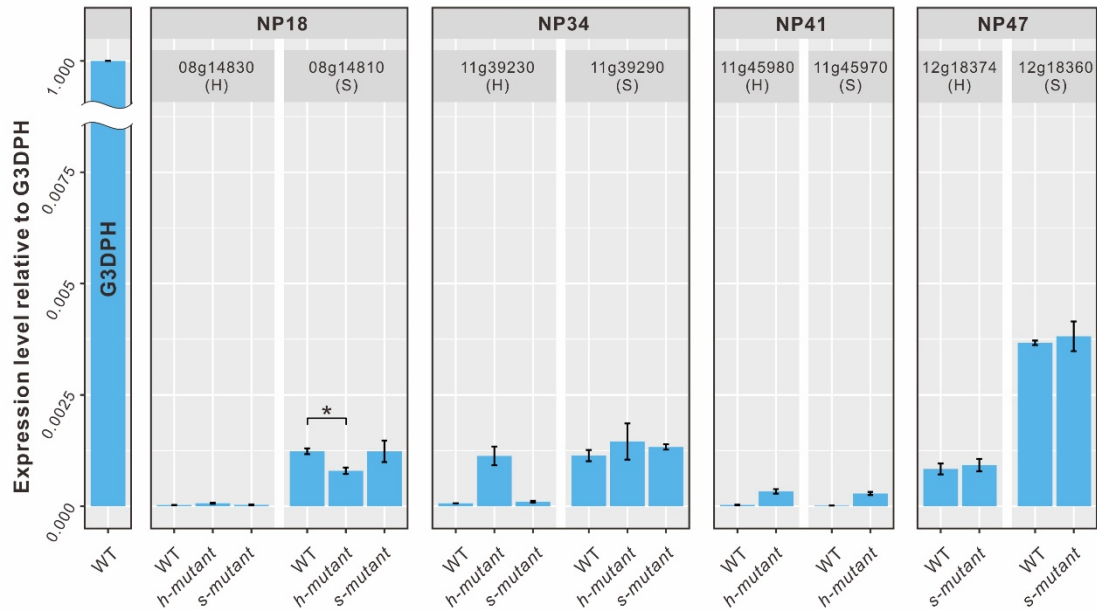

**Fig. S5. Expression level changes in paired *NLRs* after knockout.** Four *NLR* pairs (a black-box for each pair) were selected for expression analyses using RT-qPCR. The expression levels of two members [H (S) indicates that this gene is a helper (sensor)] from a pair were measured in the wild-type (WT) plants, its helper mutants (*h-mutant*) and its sensor mutants (*s-mutant*). For pair NP41, the sensor mutant was unavailable, so only the WT and helper mutant plants were measured. Similarly, only the WT and sensor mutant plants were measured in pair NP47 as no helper mutants were obtained. All measured genes displayed low expression levels as reported before (40, 41). Although several genes seemed to show altered expression levels in their helper mutants, the changes were not statistically significant. No significant changes in gene expression levels were observed in all sensor mutants. Therefore, the functional changes of those *NLRs* were likely to be due to changes at the protein level but not at the transcription level. RNA samples were collected from fresh leaves of around 21-day-old plants. The y-axis represents the expression level relative to the endogenous gene control G3DPH ( $2^{-\Delta CT}$ ). Bars represent mean  $\pm$  SD (n=3). The unpaired t-test was used to calculate the statistical significance between plants. Significance level after Bonferroni correction for multiple testing: \* $P < 0.004$ , \*\* $P < 0.0008$ , \*\*\* $P < 8 \times 10^{-5}$ .

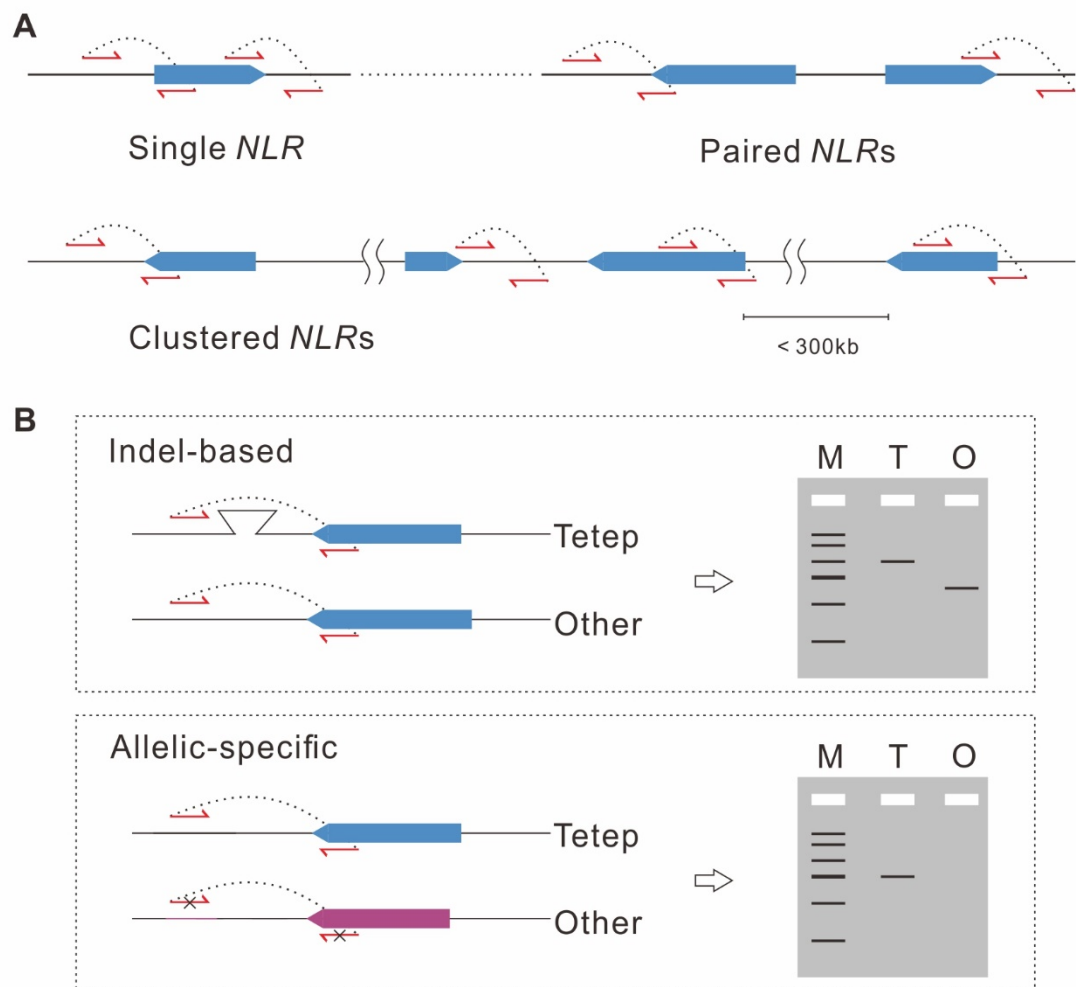

**Fig. S6. Design of PCR primers to verify Tetep-derived *NLRs*.** (A) Multiple PCR primer pairs designed to amplify nearly every *NLR* gene in the Tetep genome. For single and paired *NLR* genes, we design two primer pairs for each gene to amplify two regions in the gene; however, in a number of cases only one pair can be designed because no suitable second pair can be found. For a *NLR* cluster, we design two primer pairs for the first *NLR* gene, one primer pair for the upstream region and one primer pair for the 3' region of the middle *NLR* gene, and one primer pair for the 3' end of the last *NLR* gene. (B) Design of indel-based and allele-specific primer pairs. A primer pair is designed to include an indel in the Tetep genome relative to one or more of the other four genomes if such an indel can be found. If no indel can be found, then we design an allele-specific primer pair that can amplify the targeted region in Tetep but not in one or more of the other genomes, denoted by "Other" in the figure. Notations: M: standard DNA marker, T: Tetep, O: one of Nipponbare, R498, 9311 and MH63.

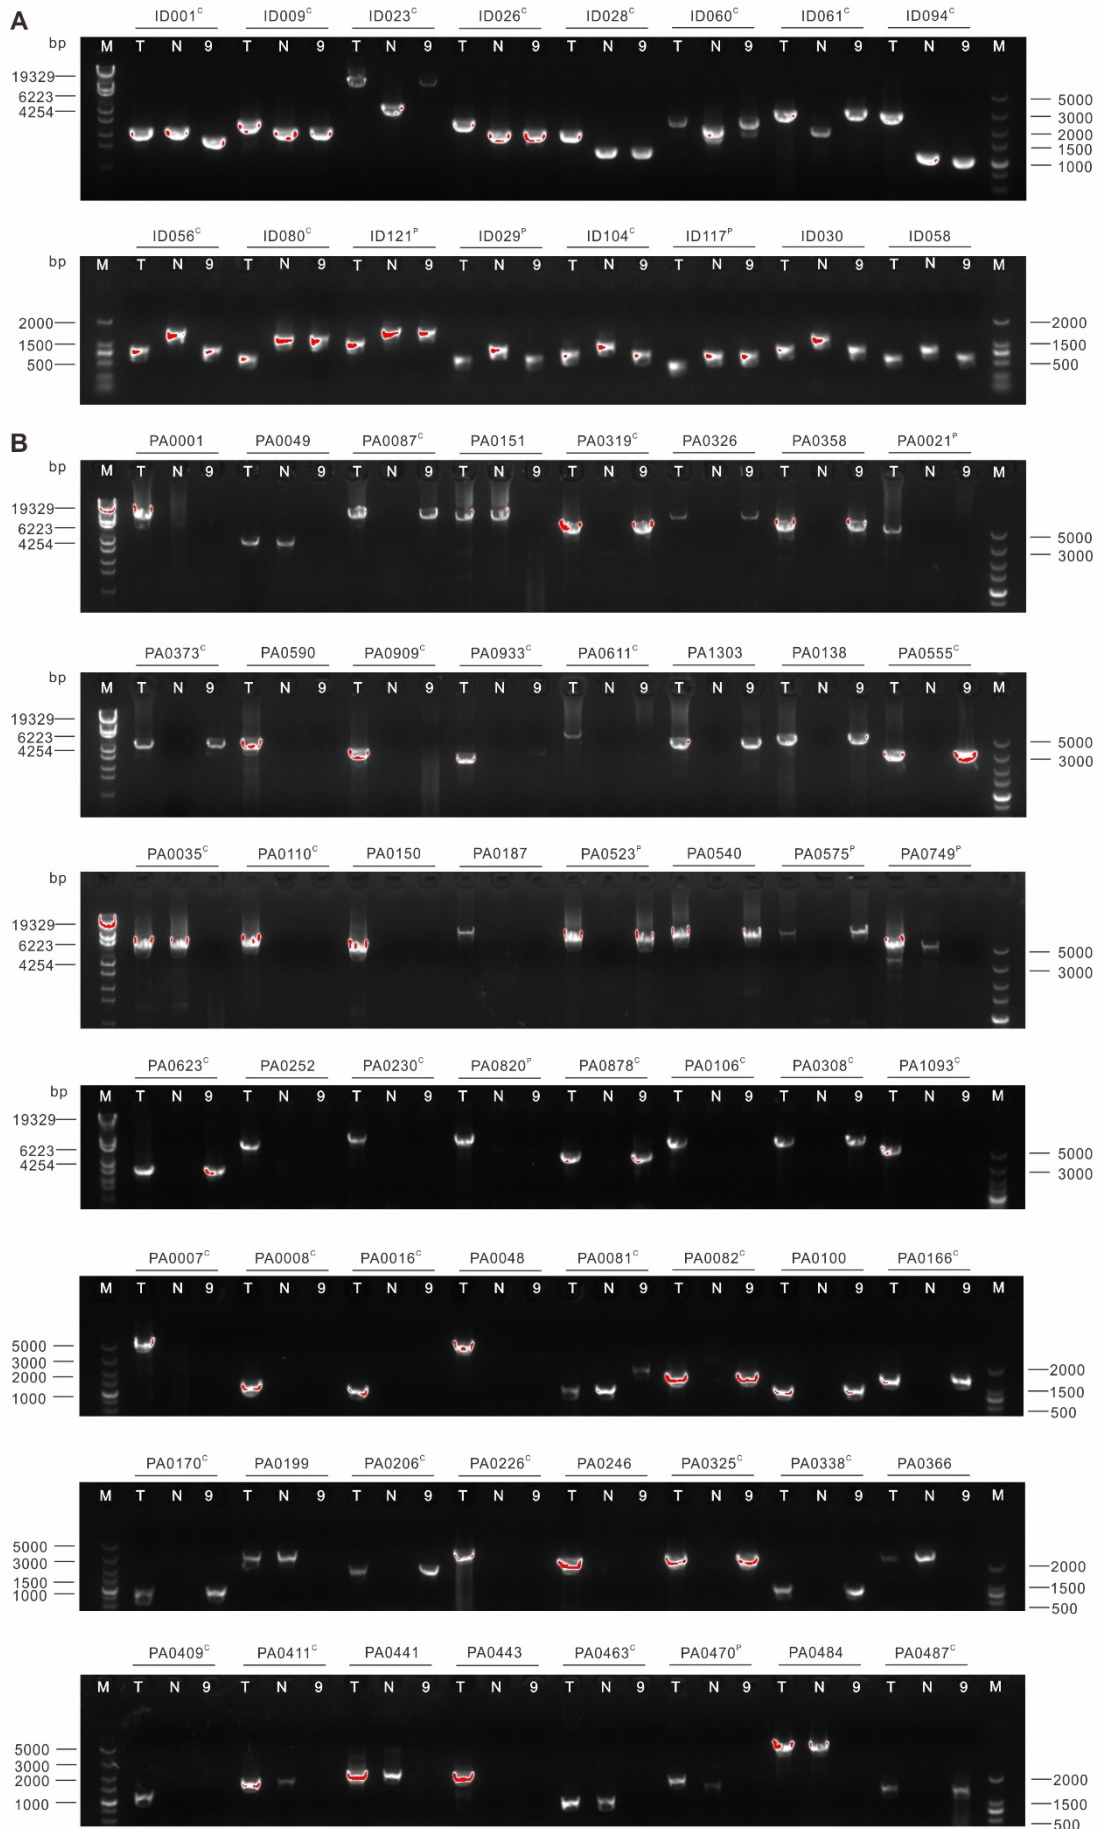



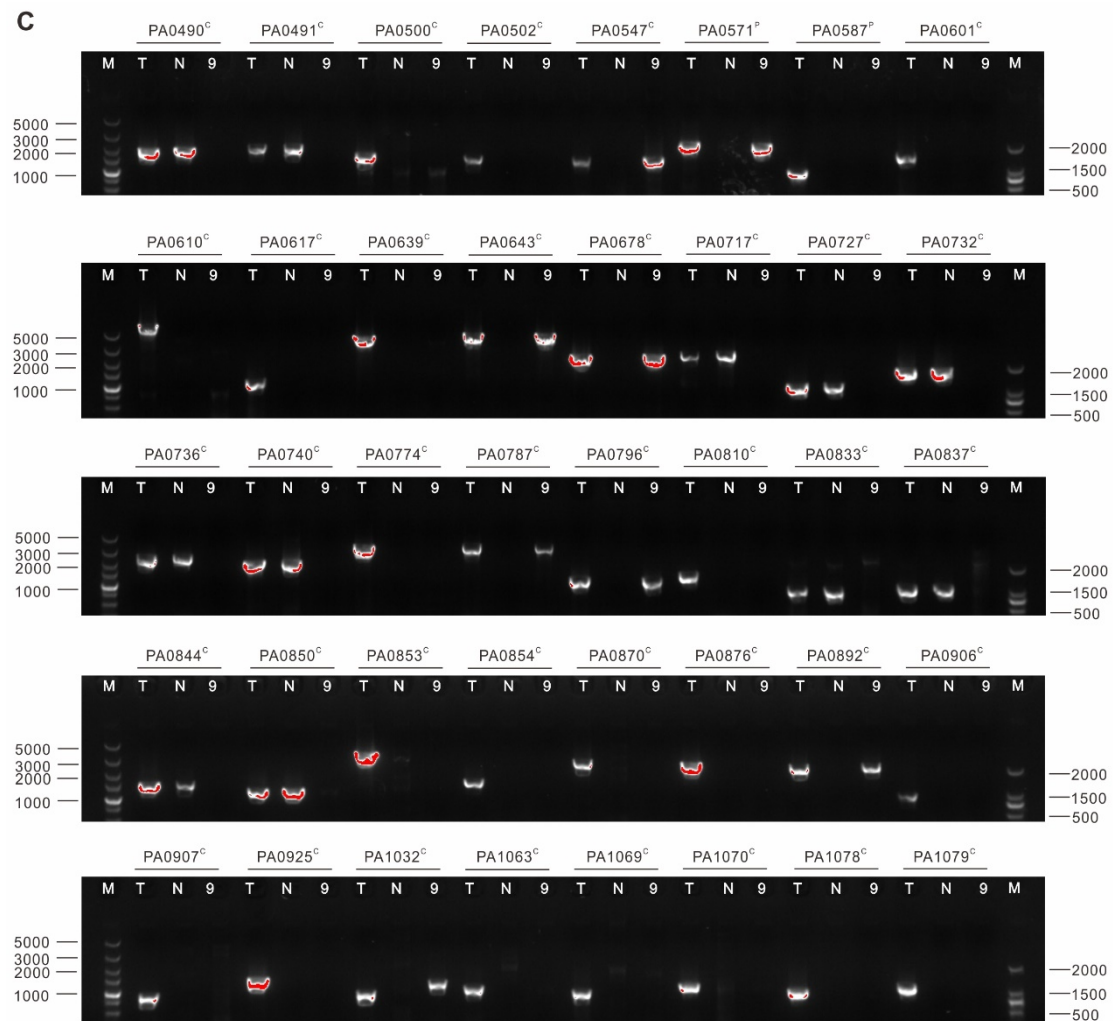

**Fig. S7. Verification of PCR markers designed to amplify Tetep-derived *NLRs*.** (A) Verification results of 16 indel-based PCR primer pairs. These results indicate that indel-based PCR markers can be used to distinguish Tetep (T) from Nipponbare (N) or 9311 (9) by band size in gel electrophoresis. The full list of verified indel-based PCR markers and amplification results are given in Dataset S1. All predicted indels between Tetep and each of four other genomes within the *NLR* regions are given in Dataset S2. (B, C) Verification results of 96 allelic-specific PCR primer pairs. These results indicate that allelic-specific PCR markers can be used to distinguish Tetep from Nipponbare and 9311 by the presence or absence of bands in gel electrophoresis. The full list of verified allelic-specific PCR markers and amplification results are given in Dataset S1. PCR markers designed for *NLR* clusters are marked by superscript “C” while PCR markers designed for paired *NLRs* are marked by superscript “P”. Standard DNA marker (M), leftmost:  $\lambda$ -*EcoT14* I digest, and rightmost: DL 5,000.

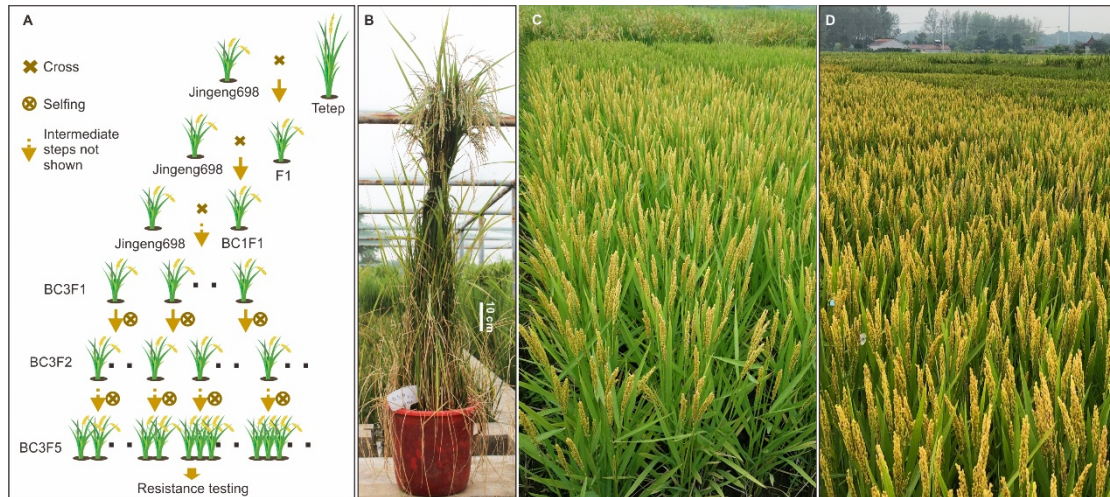

**Fig. S8. Experimental crosses between Tetep and a blast-susceptible *japonica* cultivar Jingeng698.** (A) Detailed crossing procedures. Multiple crossing steps were adopted to obtain fertile progeny with beneficial yield traits from Jingeng698 as well as improved resistance from Tetep. During these steps, the progeny were selected if they 1) carry the *japonica*-derived S5 locus (42) in order to overcome the hybrid sterility between *indica* and *japonica* rice; 2) have favored phenotypes similar as Jingeng698; and 3) contain the Tetep-derived “tig00011732.fgenes48 / tig00011732.fgenes49” NLR block. The progeny at BC3F5 generation (each from independent BC3F1 generation) were used for resistance testing. BC, backcross. (B) Phenotypes of rice Tetep. Tetep is poor in yield traits with a tall stature (~150 cm). Photo taken in Aug 30, 2017, ~130 days old. (C) Field photo of rice Jingeng698. Jingeng698 carries good yield traits but is susceptible blast disease. (D) Cross progeny (BC3F5 generation) with improved resistance. The progeny have improved resistance to blast, while carry the yield traits from Jingeng698. Photos (C, D) taken in Sep 6, 2018, ~150 days old.

**Table S1. Sequencing statistics of the Tetep genome.**

| <b>Platform</b>                  | <b>Insert size (bp)</b> | <b>No. of reads*</b> | <b>Average read length (bp)</b> | <b>N50** (bp)</b> | <b>Total Data (Gb)</b> | <b>Coverage depth**</b> |
|----------------------------------|-------------------------|----------------------|---------------------------------|-------------------|------------------------|-------------------------|
| Genomic PacBio (RS II)           | 20,000                  | 7,774,683            | 8,532                           | 11,763            | 66.3                   | 147.7                   |
| Genomic Illumina (Hiseq 2000 PE) | 500                     | 93,480,914           | 100                             | 100               | 9.3                    | 20.8                    |
| Genomic Illumina (Hiseq 4000 PE) | 350                     | 161,737,412          | 150                             | 150               | 24.3                   | 54.0                    |
| RNA-seq (Illumina Hiseq 4000 PE) | 300                     | 120,777,542          | 150                             | 150               | 18.1                   | -                       |
| RNA-seq (Illumina Hiseq 4000 PE) | 300                     | 125,590,036          | 150                             | 150               | 18.8                   | -                       |

\* For genomic PacBio data, “reads” here stand for subreads, i.e. reads partitioned from polymerase read after removing adapters;

\*\* N50 was calculated based on the 449 Mb genome size estimated by Mahesh et al, 2016 (6).

**Table S2. Assembly metrics at each assembly stage.**

| <b>Assembly stage</b>                 | <b>No. of Contigs</b>  | <b>Average contig length</b> | <b>N50</b> | <b>Total size excluding gaps (Mb)</b> |
|---------------------------------------|------------------------|------------------------------|------------|---------------------------------------|
| <b>Canu assembly</b>                  | 1,119                  | 357.1 kb                     | 799.3 kb   | 399.7                                 |
| <b>1<sup>st</sup> round polishing</b> | 1,119                  | 357.3 kb                     | 799.6 kb   | 399.9                                 |
| <b>Chromosome anchoring</b>           | 12 chrs* + 357 contigs | 1.12 Mb                      | 28.1 Mb    | 399.8                                 |
| <b>Gap filling</b>                    | 12 chrs + 356 contigs  | 1.13 Mb                      | 28.1 Mb    | 401.7                                 |
| <b>2<sup>nd</sup> round polishing</b> | 12 chrs + 356 contigs  | 1.13 Mb                      | 28.1 Mb    | 401.8                                 |

\*chromosomes

**Table S3. Statistics of the completeness of the Tetep genome based on the presence of the 248 core eukaryotic genes (CEGs)**

|            | No. of CEGs | Tetep         |                    | Nipponbare   |                  | MH63         |                  | R498         |                  |
|------------|-------------|---------------|--------------------|--------------|------------------|--------------|------------------|--------------|------------------|
|            |             | CEGs Present* | Completeness** (%) | CEGs Present | Completeness (%) | CEGs Present | Completeness (%) | CEGs Present | Completeness (%) |
| Group 1    | 66          | 62            | 93.94              | 65           | 98.48            | 60           | 90.91            | 65           | 98.48            |
| Group 2    | 56          | 55            | 98.21              | 54           | 96.43            | 52           | 92.86            | 55           | 98.21            |
| Group 3    | 61          | 61            | 100                | 61           | 100              | 60           | 98.36            | 61           | 100              |
| Group 4    | 65          | 65            | 100                | 65           | 100              | 64           | 98.46            | 65           | 100              |
| All Groups | 248         | 243           | 97.98              | 245          | 98.79            | 236          | 95.16            | 246          | 99.19            |

\*Number of CEGs present in genome; \*\*Percentage of CEGs present in genome

**Table S4. Comparison of annotated *NLRs* in different rice genomes.**

|             | Tetep                                |         | Nipponbare | MH63   | R498      |        |
|-------------|--------------------------------------|---------|------------|--------|-----------|--------|
|             | MAKER-P                              | Fgenesh | MSU v7     | RS1    | IGDBv3*** |        |
| Annotated   | Effective Genome Size (Mbp)          | 402     | 373        | 360    | 391       |        |
|             | No. of non-TE Coding Genes           | 37,054  | 41,937     | 39,049 | 37,324    | 37,549 |
|             | Average CDS length*                  | 1,213   | 1,049      | 1,064  | 1,116     | 1,087  |
|             | <i>NLRs</i> annotated                | 327     | 455        | 473    | 455       | 409    |
|             | <i>NLRs</i> annotated per Mbp        | 0.81    | 1.13       | 1.27   | 1.26      | 1.03   |
| Estimated** | All <i>NLR</i> regions predicted     | 519     | 504        | 514    | 531       |        |
|             | <i>NLR</i> regions predicted per Mbp | 1.29    | 1.35       | 1.43   | 1.36      |        |
|             | Overlapped regions with annotated    | 498     | 476        | 493    | 453       |        |
|             | % of overlapped regions              | 96.0%   | 94.4%      | 95.9%  | 85.3%     |        |

\*Only the representative or longest transcripts were considered if the annotation set contained alternative spliced isoforms; \*\*Estimated putative *NLR* regions by NLR-annotator; \*\*\*Data downloaded from <http://www.mbkbase.org/R498/>

**Table S5. Nucleotide diversity between Tetep *NLRs* and orthologous Nipponbare, MH63, and R498 *NLRs*.**

|                                        | Tetep                                              | Nipponbare | MH63   | R498   |
|----------------------------------------|----------------------------------------------------|------------|--------|--------|
| NLRs with orthologues <sup>a</sup>     | Count                                              | 360        | 335    | 332    |
|                                        | Mean diversity of nearest orthologues <sup>b</sup> | 0.0596     | 0.0422 | 0.0483 |
| NLRs without orthologues               | BLASTP Identity & Coverage $\geq$ 50%              | 78         | 88     | 104    |
|                                        | BLASTP Identity & Coverage < 50%                   | 17         | 32     | 19     |
| Genomic average diversity <sup>c</sup> |                                                    | 0.0084     | 0.004  | 0.0041 |

<sup>a</sup> Orthologues were identified using OrthoFinder based on protein sequences of NB-ARC domain;

<sup>b</sup> The nucleotide diversity (p-distance) was calculated for all orthologue gene pairs using the aligned coding sequences of NB-ARC domain. For each Tetep *NLR* gene, only its nearest orthologue in Nipponbare or in MH63 or in R498 was calculated here;

<sup>c</sup> Genomic average diversity was estimated as “Number of substitutions / Number of aligned bases” on the whole genome alignment.

**Table S6. Tetep *NLRs* tested in two susceptible cultivars Shin2 and TP309 using 12 blast pathogen strains.** R stands for “Resistant”, S for “Susceptible” and N for “Not assessed”. The results are given in the order of Shin2/TP309, e.g. R/S to S2007 means this gene conferred resistance to blast strain S2007 when transformed to Shin2 but was susceptible to the same strain when transformed to TP309. Single “N” stands for no results for both cultivars, i.e. equivalent to “N/N”.

| ID*               | Gene ID                 | S2007 | BEI1 | TPXL | S30 | S2004 | ZB15 | S1  | B7  | B13 | S1686 | B15 | LaiXian |
|-------------------|-------------------------|-------|------|------|-----|-------|------|-----|-----|-----|-------|-----|---------|
| 001               | chr12.fgenes1062        | R/S   | R/S  | R/N  | R/S | R/S   | R/N  | R/N | R/N | R/N | R/S   | R/N | R/N     |
| 002               | chr06.fgenes1195        | N/S   | S/S  | R/S  | R/S | R/S   | R/S  | R/N | R/S | R/N | S/S   | R/S | R/N     |
| 003               | chr06.fgenes377         | N     | R/R  | N    | R/R | R/S   | R/S  | R/N | R/N | R/N | S/N   | R/N | S/N     |
| 004 <sup>ab</sup> | chr11.fgenes2443(H)     | N/R   | R/S  | S/R  | S/R | S/R   | S/N  | S/R | S/N | S/N | N/R   | S/R | N       |
| 005               | chr06.fgenes378         | R/R   | R/S  | R/S  | R/S | S/S   | S/R  | R/S | S/S | R/N | N/S   | S/S | S/S     |
| 006 <sup>a</sup>  | chr04.fgenes1052        | R/R   | R/S  | R/N  | S/R | S/R   | R/R  | N   | N   | N   | N     | N   | N       |
| 007               | chr11.fgenes1916        | S/R   | R/R  | R/S  | R/S | R/R   | N    | N/S | N   | N   | N/R   | N/S | N       |
| 008               | chr05.fgenes1166        | S/R   | S/S  | R/R  | R/S | S/N   | N/S  | R/S | R/R | R/S | N/S   | N   | N       |
| 009               | chr03.fgenes4090        | N/R   | N/R  | N    | N/R | N/R   | N    | N   | N   | N   | N/R   | N   | N       |
| 010 <sup>ab</sup> | tig00011732.fgenes48(H) | S/R   | R/S  | S/R  | N/S | S/S   | N/R  | N/S | N/S | N/S | N     | N/S | R/S     |
| 011 <sup>a</sup>  | chr11.fgenes2349        | S/R   | S/S  | S/S  | S/R | S/S   | S/R  | R/R | R/S | S/S | S/S   | S/S | S/S     |
| 012 <sup>a</sup>  | chr11.fgenes2222        | N/R   | N    | N/S  | N/S | N/R   | N    | N/R | N   | N   | N/R   | N   | N       |
| 013               | chr02.fgenes1135        | N/R   | N/S  | N/R  | N/S | N/R   | N    | N/S | N   | N   | N/R   | N   | N       |
| 014               | chr06.fgenes1561        | N/R   | R/N  | N/S  | S/S | R/S   | N    | N   | N   | N   | S/S   | S/N | R/N     |
| 015 <sup>b</sup>  | chr11.fgenes1897(H)     | N     | R/S  | N/S  | S/S | R/S   | N/S  | N   | N/S | N   | S/N   | S/R | R/N     |
| 016 <sup>ab</sup> | tig00011732.fgenes49(S) | S/S   | S/S  | S/R  | S/S | S/S   | S/R  | N   | S/R | N   | N     | R/S | S/S     |
| 017 <sup>ab</sup> | chr11.fgenes2446(H)     | N/S   | S/S  | S/S  | R/R | N/S   | N    | R/S | R/R | R/S | N/S   | N   | N/S     |
| 018               | chr08.fgenes1326        | R/S   | S/S  | S/R  | S/S | R/S   | N/S  | N/S | N/S | N/S | R/S   | S/N | S/S     |
| 019 <sup>a</sup>  | chr11.fgenes2397        | S/S   | S/R  | S/R  | S/S | N/S   | N/S  | N/R | N/R | N/S | N/S   | N/S | N/S     |
| 020 <sup>a</sup>  | chr12.fgenes1311        | N/R   | N/R  | N    | N/R | N/S   | N    | N   | N   | N   | N     | N   | N       |



|                         |                          |     |     |     |     |     |     |     |     |     |     |     |     |
|-------------------------|--------------------------|-----|-----|-----|-----|-----|-----|-----|-----|-----|-----|-----|-----|
| <b>021</b>              | chr01.fgenes1736         | N   | N/R | N   | N/S | N/S | N/R | N   | N   | N/R | N   | N   | N   |
| <b>022<sup>ab</sup></b> | chr10.fgenes936(H)       | S/R | R/S | S/N | S/R | S/N | N   | N   | N   | N   | N   | N   | N   |
| <b>023</b>              | chr08.fgenes337          | N/R | N/R | N   | N/S | N/R | N/S | N   | N   | N   | N/S | N   | N   |
| <b>024<sup>a</sup></b>  | chr11.fgenes2359         | N/R | N/R | N   | N/S | N/S | N/S | N   | N   | N   | N/R | N   | N   |
| <b>025<sup>a</sup></b>  | chr07.fgenes257          | N/R | N/R | N/S | N/R | N/S | N/S | N   | N   | N   | N   | N   | N/S |
| <b>026<sup>b</sup></b>  | chr09.fgenes616(H)       | N/R | N/R | N/R | N/S | N/S | N   | N/S | N   | N   | N/S | N   | N   |
| <b>027</b>              | chr08.fgenes433          | N/R | N/S | N/R | N/S | N/S | N   | N   | N   | N   | N/S | N/R | N/S |
| <b>028</b>              | chr01.fgenes1212         | S/S | S/S | N/R | S/R | N/S | N   | S/S | N   | S/S | R/S | N   | N/S |
| <b>029</b>              | chr02.fgenes1750         | S/R | S/S | N/R | S/S | S/S | S/S | S/N | N/S | N   | N   | N/R | N   |
| <b>030<sup>a</sup></b>  | chr05.fgenes1360         | S/N | S/N | R/N | S/N | S/N | S/N | N   | R/N | N   | N   | R/N | S/N |
| <b>031<sup>a</sup></b>  | chr12.fgenes320          | N/R | S/S | S/R | S/S | S/S | S/R | N   | S/N | S/N | N   | S/N | N/S |
| <b>032<sup>a</sup></b>  | chr11.fgenes2362         | N/R | R/S | S/R | S/S | S/S | S/N | S/N | S/N | S/S | N   | S/S | N/S |
| <b>033<sup>b</sup></b>  | chr11.fgenes1294(S)      | R/N | S/N | S/N | S/N | S/N | R/N | S/N | S/N | R/N | S/N | S/N | S/N |
| <b>034</b>              | chr04.fgenes1028         | R/N | R/N | N   | S/N | S/N | N   | N   | N   | N   | N   | N   | N   |
| <b>035<sup>a</sup></b>  | chr03.fgenes2322         | N/S | N/R | N   | N   | N/S | N/R | N   | N   | N   | N   | N   | N   |
| <b>036<sup>a</sup></b>  | chr05.fgenes1993         | N/S | N/R | N   | N/R | N   | N   | N   | N   | N   | N/S | N   | N   |
| <b>037<sup>b</sup></b>  | chr12.fgenes52(S)        | N/R | N/S | N   | N/R | N/S | N   | N   | N   | N   | N   | N   | N   |
| <b>038</b>              | chr02.fgenes1620         | N/R | N/S | N/S | N/R | N/S | N   | N   | N   | N   | N   | N   | N   |
| <b>039</b>              | chr06.fgenes419          | N/R | N/S | N   | N/R | N/S | N   | N   | N   | N   | N/S | N   | N   |
| <b>040</b>              | chr07.fgenes465          | S/S | N   | S/S | R/S | S/S | N   | N   | N   | S/R | N   | N   | N/S |
| <b>041</b>              | chr08.fgenes2171         | N   | S/S | R/R | S/S | N   | N   | R/R | S/S | S/S | N   | N   | N   |
| <b>042</b>              | chr11.fgenes884          | N/R | N/S | N/R | N/S | N/S | N   | N   | N   | N   | N/S | N   | N   |
| <b>043<sup>b</sup></b>  | tig00001023.fgenes127(S) | N/S | N/R | N/R | N/S | N/S | N   | N   | N   | N   | N/S | N   | N   |
| <b>044</b>              | chr11.fgenes1399         | N/S | N/S | N/R | N/S | N/S | N/R | N/S | N   | N   | N   | N   | N   |
| <b>045</b>              | tig00012256.fgenes107    | N/S | N/S | N/S | N/S | N/R | N/R | N   | N   | N   | N   | N   | N/S |

|                        |                      |     |     |     |     |     |     |     |     |     |     |     |     |
|------------------------|----------------------|-----|-----|-----|-----|-----|-----|-----|-----|-----|-----|-----|-----|
| <b>046</b>             | chr11.fgenes1737     | R/N | S/N | S/N | S/N | R/N | N   | N   | S/N | N   | S/N | S/N | S/N |
| <b>047</b>             | tig00011816.fgenes38 | N   | S/N | S/N | S/N | N   | R/N | S/N | S/N | R/N | S/N | N   | S/N |
| <b>048</b>             | chr08.fgenes674      | N   | S/S | N/S | S/S | R/N | N/S | N/S | N/S | N   | S/N | S/N | R/N |
| <b>049<sup>a</sup></b> | tig00012169.fgenes81 | N/S | S/S | S/S | S/S | S/S | R/N | N/S | S/N | N   | N   | R/N | N/S |
| <b>050</b>             | chr11.fgenes1768     | S/S | S/S | S/R | S/S | S/S | S/S | R/N | S/N | S/N | N   | S/N | S/S |
| <b>051<sup>a</sup></b> | chr02.fgenes1739     | S/S | S/S | S/S | S/R | S/S | S/N | S/S | S/R | S/S | N/S | N   | N/S |
| <b>052<sup>a</sup></b> | chr11.fgenes2338     | N/S | S/S | S/R | S/S | S/S | S/R | S/N | S/N | S/N | N   | S/N | N/S |
| <b>053</b>             | chr03.fgenes2479     | N   | N   | N   | N   | N/R | N   | N   | N   | N   | N   | N   | N   |
| <b>054</b>             | chr03.fgenes2358     | N   | N/R | N   | N   | N/S | N   | N   | N   | N   | N   | N   | N   |
| <b>055</b>             | chr01.fgenes93       | N   | N/R | N   | N/S | N/S | N   | N   | N   | N   | N   | N   | N   |
| <b>056</b>             | chr09.fgenes707      | N/R | N   | N   | N   | N/S | N   | N   | N   | N   | N/S | N   | N   |
| <b>057<sup>a</sup></b> | chr02.fgenes2398     | N/R | N/S | N   | N/S | N   | N   | N   | N   | N   | N   | N   | N   |
| <b>058<sup>a</sup></b> | chr05.fgenes820      | N/R | N   | N   | N   | N/S | N   | N   | N   | N   | N/S | N   | N   |
| <b>059<sup>a</sup></b> | chr07.fgenes729      | N/S | N/S | N   | N/R | N   | N   | N   | N   | N   | N   | N   | N   |
| <b>060<sup>a</sup></b> | chr09.fgenes343      | N/R | N   | N   | N/S | N   | N   | N   | N   | N   | N/S | N   | N   |
| <b>061</b>             | chr02.fgenes1256     | N/R | N/S | N/S | N/S | N   | N   | N   | N   | N   | N   | N   | N   |
| <b>062</b>             | chr06.fgenes1423     | N/S | N/R | N   | N/S | N/S | N   | N   | N   | N   | N   | N   | N   |
| <b>063</b>             | tig00011639.fgenes2  | N/R | N   | N   | N/S | N/S | N   | N   | N   | N   | N/S | N   | N   |
| <b>064<sup>a</sup></b> | chr06.fgenes3001     | N/S | N/S | N   | N   | N/R | N   | N   | N   | N   | N/S | N   | N   |
| <b>065<sup>a</sup></b> | chr10.fgenes247      | N/S | N   | N   | N   | N/S | N   | N   | N   | N/S | N/R | N   | N   |
| <b>066<sup>a</sup></b> | chr10.fgenes301      | N/S | N/S | N   | N/S | N/R | N   | N   | N   | N   | N   | N   | N   |
| <b>067<sup>a</sup></b> | chr10.fgenes672      | N/S | N/R | N   | N/S | N/S | N   | N   | N   | N   | N   | N   | N   |
| <b>068<sup>a</sup></b> | chr11.fgenes2277     | N/S | N/S | N   | N/R | N   | N   | N   | N   | N/S | N   | N   | N   |
| <b>069<sup>a</sup></b> | chr11.fgenes2354     | N/S | N   | N   | N/S | N/R | N   | N   | N   | N   | N/S | N   | N   |
| <b>070<sup>b</sup></b> | chr01.fgenes926(H)   | N/R | N/S | N/S | N/S | N   | N   | N   | N   | N   | N   | N   | N   |

|                        |                           |     |     |     |     |     |     |     |     |     |     |     |     |
|------------------------|---------------------------|-----|-----|-----|-----|-----|-----|-----|-----|-----|-----|-----|-----|
| <b>071<sup>b</sup></b> | chr01.fgenesH4235(S)      | N/R | N/S | N   | N/S | N/S | N   | N   | N   | N   | N   | N   | N   |
| <b>072<sup>b</sup></b> | chr11.fgenesH1888(S)      | N/S | N/R | N   | N   | N/S | N   | N   | N   | N   | N/S | N   | N   |
| <b>073<sup>b</sup></b> | chr12.fgenesH62(H)        | N/S | N/R | N   | N/S | N/S | N   | N   | N   | N   | N   | N   | N   |
| <b>074</b>             | chr03.fgenesH3176         | N/R | N   | N/S | N/S | N/S | N   | N   | N   | N   | N/S | N   | N   |
| <b>075</b>             | chr04.fgenesH1030         | N/R | N/S | N   | N/S | N/S | N   | N   | N   | N   | N/S | N   | N   |
| <b>076</b>             | chr12.fgenesH1226         | N   | N/R | N   | N/S | N/S | N   | N/S | N   | N   | N/S | N   | N   |
| <b>077</b>             | tig00011792.fgenesH30     | N/S | N/S | N   | N   | N/S | N   | N/S | N   | N   | N/R | N   | N   |
| <b>078</b>             | chr05.fgenesH1649         | N/S | N/R | N   | N/S | N/S | N   | N/S | N   | N   | N/S | N   | N   |
| <b>079</b>             | chr06.fgenesH1194         | N   | S/N | S/N | S/N | N   | N   | S/N | S/N | R/N | N   | N   | N   |
| <b>080</b>             | tig00000101.fgenesH4      | N   | R/N | N   | S/N | S/N | N   | N   | N   | N   | S/N | S/N | S/N |
| <b>081</b>             | tig00012434.fgenesH76     | N   | N/S | N   | N/R | N/S | N   | N   | N   | N   | N/S | N/S | N/S |
| <b>082<sup>a</sup></b> | chr06.fgenesH3041         | N/R | N/S | N   | N/S | N/S | N   | N/S | N   | N   | N/S | N   | N   |
| <b>083<sup>a</sup></b> | chr12.fgenesH196          | N/R | N/S | N   | N/S | N/S | N   | N/S | N   | N   | N/S | N   | N   |
| <b>084</b>             | chr01.fgenesH3045         | S/S | R/S | S/S | S/S | S/S | N   | N/S | N   | N   | N   | N   | N/S |
| <b>085</b>             | chr11.fgenesH449          | S/N | S/N | R/N | S/N | S/N | N   | S/N | N   | N   | N   | N   | S/N |
| <b>086</b>             | chr11.fgenesH950          | N/S | N/S | N/S | N/S | N/S | N/R | N/S | N   | N   | N   | N   | N   |
| <b>087</b>             | chr09.fgenesH606          | N   | N/R | N/S | N/S | N/S | N/S | N   | N/S | N/S | N   | N/S | N   |
| <b>088<sup>b</sup></b> | tig00001023.fgenesH110(H) | S/S | N/S | S/S | S/S | S/S | N   | N/S | N   | R/N | N   | N   | N/S |
| <b>089</b>             | chr08.fgenesH338          | S/R | N/S | N/S | S/S | S/S | N/S | S/N | N/S | N   | N/S | N/S | S/S |
| <b>090<sup>b</sup></b> | chr11.fgenesH1900(H)      | N/R | N/S | N   | N/S | N/S |
| <b>091</b>             | chr01.fgenesH2994         | N   | N   | N   | N   | N/S | N   | N   | N   | N   | N   | N   | N   |
| <b>092<sup>a</sup></b> | chr12.fgenesH887          | N   | N   | N   | N   | N/S | N   | N   | N   | N   | N   | N   | N   |
| <b>093<sup>b</sup></b> | chr11.fgenesH1896(S)      | N   | N   | N   | N   | N/S | N   | N   | N   | N   | N   | N   | N   |
| <b>094</b>             | chr03.fgenesH2095         | N/S | N   | N   | N   | N/S | N   | N   | N   | N   | N   | N   | N   |
| <b>095</b>             | chr07.fgenesH1747         | N/S | N   | N   | N/S | N   | N   | N   | N   | N   | N   | N   | N   |

|                        |                       |     |     |     |     |     |   |     |   |     |     |   |     |
|------------------------|-----------------------|-----|-----|-----|-----|-----|---|-----|---|-----|-----|---|-----|
| <b>096</b>             | chr08.fgenes371       | S/N | N   | N   | S/N | N   | N | N   | N | N   | N   | N | N   |
| <b>097</b>             | chr12.fgenes1029      | N/S | N   | N   | N   | N/S | N | N   | N | N   | N   | N | N   |
| <b>098</b>             | tig00011511.fgenes88  | N   | N   | S/N | N   | N   | N | S/N | N | N   | N   | N | N   |
| <b>099<sup>a</sup></b> | chr02.fgenes1252      | N/S | N   | N   | N   | N/S | N | N   | N | N   | N   | N | N   |
| <b>100<sup>a</sup></b> | chr09.fgenes330       | N/S | N   | N   | N/S | N   | N | N   | N | N   | N   | N | N   |
| <b>101<sup>b</sup></b> | chr01.fgenes3092(S)   | N/S | N   | N   | N/S | N   | N | N   | N | N   | N   | N | N   |
| <b>102</b>             | chr02.fgenes1425      | N/S | N   | N   | N   | N/S | N | N   | N | N   | N/S | N | N   |
| <b>103</b>             | chr04.fgenes708       | N/S | N   | N   | N   | N/S | N | N/S | N | N   | N   | N | N   |
| <b>104</b>             | chr04.fgenes1023      | N/S | N   | N   | N/S | N   | N | N   | N | N   | N/S | N | N   |
| <b>105</b>             | chr08.fgenes182       | N/S | N/S | N   | N   | N/S | N | N   | N | N   | N   | N | N   |
| <b>106</b>             | chr11.fgenes2185      | N/S | N/S | N   | N/S | N   | N | N   | N | N   | N   | N | N   |
| <b>107</b>             | chr12.fgenes761       | N/S | N/S | N   | N/S | N   | N | N   | N | N   | N   | N | N   |
| <b>108</b>             | chr12.fgenes1278      | N/S | N/S | N   | N   | N/S | N | N   | N | N   | N   | N | N   |
| <b>109</b>             | tig00012256.fgenes109 | N/S | N   | N   | N   | N/S | N | N   | N | N   | N/S | N | N   |
| <b>110<sup>a</sup></b> | chr06.fgenes2410      | N/S | N   | N   | N   | N/S | N | N   | N | N   | N/S | N | N   |
| <b>111<sup>b</sup></b> | chr01.fgenes3091(H)   | N/S | N   | N   | N/S | N/S | N | N   | N | N   | N   | N | N   |
| <b>112</b>             | chr01.fgenes1401      | N   | N/S | N   | N/S | N/S | N | N   | N | N   | N   | N | N/S |
| <b>113</b>             | chr01.fgenes1660      | N/S | N/S | N   | N/S | N/S | N | N   | N | N   | N   | N | N   |
| <b>114</b>             | chr02.fgenes1254      | N/S | N/S | N   | N/S | N/S | N | N   | N | N   | N   | N | N   |
| <b>115</b>             | chr05.fgenes935       | N/S | N   | N/S | N/S | N/S | N | N   | N | N   | N   | N | N   |
| <b>116</b>             | chr05.fgenes1434      | N/S | N/S | N   | N/S | N   | N | N   | N | N   | N/S | N | N   |
| <b>117</b>             | chr06.fgenes3072      | N/S | N   | N   | N/S | N/S | N | N   | N | N   | N/S | N | N   |
| <b>118</b>             | chr07.fgenes1755      | S/N | N   | N   | S/N | S/N | N | N   | N | S/N | N   | N | N   |
| <b>119</b>             | chr08.fgenes206       | N/S | N/S | N   | N   | N/S | N | N   | N | N   | N/S | N | N   |
| <b>120</b>             | chr08.fgenes380       | N/S | N   | N   | N/S | N/S | N | N   | N | N   | N/S | N | N   |

|                  |                        |     |     |     |     |     |   |     |   |     |     |   |     |
|------------------|------------------------|-----|-----|-----|-----|-----|---|-----|---|-----|-----|---|-----|
| 121              | chr08.fgenesh465       | N   | S/N | N   | S/N | S/N | N | N   | N | N   | N   | N | S/N |
| 122              | chr11.fgenesh203       | N   | N/S | N   | N/S | N/S | N | N   | N | N   | N   | N | N/S |
| 123              | chr11.fgenesh825       | N/S | N/S | N   | N   | N/S | N | N/S | N | N   | N   | N | N   |
| 124              | chr11.fgenesh881       | N/S | N/S | N   | N/S | N/S | N | N   | N | N   | N   | N | N   |
| 125              | chr11.fgenesh2195      | N/S | N/S | N   | N/S | N   | N | N   | N | N   | N/S | N | N   |
| 126              | chr12.fgenesh54        | N/S | N/S | N   | N/S | N/S | N | N   | N | N   | N   | N | N   |
| 127              | chr12.fgenesh789       | N/S | N/S | N   | N/S | N/S | N | N   | N | N   | N   | N | N   |
| 128              | chr12.fgenesh1027      | N/S | N/S | N   | N/S | N/S | N | N   | N | N   | N   | N | N   |
| 129              | chr12.fgenesh1279      | N   | N/S | N   | N/S | N/S | N | N   | N | N/S | N   | N | N   |
| 130              | tig00000101.fgenesh25  | N   | N/S | N   | N/S | N/S | N | N   | N | N   | N   | N | N/S |
| 131              | tig000001019.fgenesh34 | N/S | N/S | N   | N/S | N   | N | N   | N | N   | N/S | N | N   |
| 132 <sup>a</sup> | chr02.fgenesh1736      | N/S | N   | N   | N/S | N/S | N | N   | N | N   | N/S | N | N   |
| 133 <sup>a</sup> | chr05.fgenesh807       | N/S | N/S | N/S | N   | N/S | N | N   | N | N   | N   | N | N   |
| 134 <sup>a</sup> | chr06.fgenesh2416      | N   | N/S | N   | N/S | N/S | N | N   | N | N   | N/S | N | N   |
| 135 <sup>a</sup> | chr10.fgenesh877       | N/S | N/S | N   | N/S | N/S | N | N   | N | N   | N   | N | N   |
| 136 <sup>a</sup> | chr12.fgenesh247       | N/S | N/S | N   | N/S | N/S | N | N   | N | N   | N   | N | N   |
| 137 <sup>a</sup> | tig00000482.fgenesh37  | N/S | N   | N   | N/S | N/S | N | N   | N | N   | N/S | N | N   |
| 138 <sup>b</sup> | chr01.fgenesh4234(H)   | N   | N/S | N/S | N/S | N/S | N | N   | N | N   | N   | N | N   |
| 139 <sup>b</sup> | chr03.fgenesh814(H)    | N/S | N   | N   | N/S | N/S | N | N   | N | N   | N/S | N | N   |
| 140 <sup>b</sup> | chr08.fgenesh1120(S)   | N/S | N/S | N   | N/S | N/S | N | N   | N | N   | N   | N | N   |
| 141              | chr01.fgenesh1464      | N/S | N/S | N   | N/S | N/S | N | N   | N | N   | N/S | N | N   |
| 142              | chr01.fgenesh1468      | N/S | N   | N/S | N/S | N/S | N | N   | N | N   | N/S | N | N   |
| 143              | chr01.fgenesh1473      | N/S | N/S | N   | N/S | N/S | N | N   | N | N   | N/S | N | N   |
| 144              | chr01.fgenesh2559      | N/S | N/S | N   | N/S | N/S | N | N/S | N | N   | N   | N | N   |
| 145              | chr01.fgenesh3878      | S/N | N   | S/N | S/N | S/N | N | N   | N | S/N | N   | N | N   |

|                  |                       |     |     |     |     |     |     |     |     |     |     |     |     |
|------------------|-----------------------|-----|-----|-----|-----|-----|-----|-----|-----|-----|-----|-----|-----|
| 146              | chr02.fgenes101       | N/S | N   | N/S | N/S | N/S | N   | N   | N   | N   | N/S | N   | N   |
| 147              | chr02.fgenes642       | N/S | N/S | N   | N/S | N   | N/S | N   | N   | N/S | N   | N   | N   |
| 148              | chr03.fgenes3026      | N/S | N/S | N   | N/S | N/S | N   | N   | N   | N   | N/S | N   | N   |
| 149              | chr04.fgenes67        | S/N | S/N | N   | S/N | N   | N   | N   | N   | S/N | N   | N   | S/N |
| 150              | chr05.fgenes934       | N/S | N/S | N   | N/S | N/S | N   | N   | N   | N   | N/S | N   | N   |
| 151              | chr05.fgenes1648      | N/S | N/S | N   | N/S | N/S | N   | N   | N   | N   | N/S | N   | N   |
| 152              | chr07.fgenes548       | N/S | N/S | N   | N/S | N/S | N   | N   | N   | N   | N/S | N   | N   |
| 153              | chr07.fgenes988       | N   | N/S | N/S | N/S | N/S | N   | N/S | N   | N   | N   | N   | N   |
| 154              | chr07.fgenes1324      | N/S | N   | N/S | N/S | N/S | N   | N   | N   | N   | N/S | N   | N   |
| 155              | chr07.fgenes2305      | S/N | S/N | N   | S/N | S/N | N   | N   | N   | N   | S/N | N   | N   |
| 156              | chr08.fgenes528       | N   | N   | N   | N/S | N   | N/S | N/S | N   | N   | N/S | N/S | N   |
| 157              | chr11.fgenes448       | N   | N   | N   | N/S | N/S | N   | N   | N/S | N   | N/S | N   | N/S |
| 158              | chr11.fgenes842       | N/S | N/S | N   | N/S | N/S | N   | N   | N   | N   | N/S | N   | N   |
| 159              | chr11.fgenes1323      | S/N | N   | S/N | N   | N   | N   | S/N | N   | N   | S/N | S/N | N   |
| 160              | chr11.fgenes1404      | N/S | N/S | N   | N/S | N/S | N   | N   | N   | N   | N/S | N   | N   |
| 161              | chr12.fgenes791       | N/S | N/S | N   | N/S | N/S | N   | N   | N   | N   | N/S | N   | N   |
| 162              | chr12.fgenes826       | S/N | S/N | N   | S/N | S/N | N   | N   | N   | N   | S/N | N   | N   |
| 163              | chr12.fgenes1030      | N/S | N   | N/S | N/S | N/S | N   | N   | N   | N   | N/S | N   | N   |
| 164              | tig00011455.fgenes100 | N/S | N/S | N   | N/S | N/S | N   | N   | N   | N   | N/S | N   | N   |
| 165              | tig00011498.fgenes63  | S/N | S/N | N   | N   | S/N | N   | N   | S/N | N   | N   | S/N | N   |
| 166              | tig00012053.fgenes10  | N/S | N/S | N   | N/S | N/S | N   | N   | N   | N   | N/S | N   | N   |
| 167              | tig00012122.fgenes107 | N/S | N/S | N   | N/S | N/S | N   | N   | N   | N   | N/S | N   | N   |
| 168              | tig00012313.fgenes43  | N   | N/S | N   | N   | N/S | N/S | N   | N   | N   | N/S | N/S | N   |
| 169 <sup>a</sup> | chr02.fgenes1369      | N/S | N/S | N   | N/S | N/S | N   | N   | N   | N   | N/S | N   | N   |
| 170 <sup>a</sup> | chr06.fgenes2951      | N/S | N/S | N   | N/S | N/S | N   | N   | N   | N   | N/S | N   | N   |

|                   |                           |     |     |     |     |     |     |     |     |     |     |     |     |
|-------------------|---------------------------|-----|-----|-----|-----|-----|-----|-----|-----|-----|-----|-----|-----|
| 171 <sup>a</sup>  | chr10.fgenesh262          | N/S | N/S | N   | N/S | N/S | N   | N   | N   | N   | N/S | N   | N   |
| 172 <sup>a</sup>  | chr10.fgenesh1065         | N/S | N/S | N   | N/S | N/S | N   | N/S | N   | N   | N   | N   | N   |
| 173 <sup>a</sup>  | tig00011927.fgenesh19     | N/S | N/S | N   | N/S | N/S | N   | N   | N   | N   | N/S | N   | N   |
| 174 <sup>b</sup>  | chr11.fgenesh1899(S)      | S/N | N   | N   | N   | S/N | S/N | S/N | N   | S/N | N   | N   | N   |
| 175 <sup>b</sup>  | chr12.fgenesh61(S)        | N/S | N/S | N   | N/S | N/S | N   | N   | N   | N   | N/S | N   | N   |
| 176 <sup>b</sup>  | tig00001023.fgenesh120(H) | N/S | N/S | N   | N/S | N/S | N   | N   | N   | N   | N/S | N   | N   |
| 177               | chr02.fgenesh1194         | S/N | N   | N   | S/N | S/N | N   | S/N | N   | N   | S/N | S/N | N   |
| 178               | chr04.fgenesh542          | N/S | N/S | N/S | N/S | N/S | N   | N   | N   | N   | N/S | N   | N   |
| 179               | chr06.fgenesh1319         | N/S | N/S | N   | N/S | N/S | N   | N/S | N   | N   | N/S | N   | N   |
| 180               | chr08.fgenesh343          | N   | S/N | S/N | S/N | N   | S/N | S/N | S/N | N   | N   | N   | N   |
| 181               | chr08.fgenesh2167         | S/N | S/N | S/N | S/N | S/N | N   | N   | N   | N   | N   | N   | S/N |
| 182               | chr10.fgenesh518          | N/S | N/S | N/S | N/S | N/S | N   | N   | N   | N   | N/S | N   | N   |
| 183               | chr11.fgenesh1397         | N/S | N/S | N/S | N   | N/S | N   | N/S | N   | N   | N/S | N   | N   |
| 184               | chr11.fgenesh2527         | N/S | N   | N/S | N/S | N/S | N   | N   | N   | N/S | N   | N   | N/S |
| 185               | chr12.fgenesh1307         | N/S | N/S | N/S | N   | N   | N/S | N   | N   | N/S | N   | N/S | N   |
| 186               | tig00001023.fgenesh113    | N/S | N/S | N   | N/S | N/S | N   | N/S | N   | N   | N/S | N   | N   |
| 187               | tig00011805.fgenesh67     | N/S | N/S | N/S | N/S | N/S | N   | N   | N   | N   | N/S | N   | N   |
| 188 <sup>a</sup>  | chr05.fgenesh1992         | N/S | N/S | N   | N/S | N/S | N   | N/S | N   | N   | N/S | N   | N   |
| 189 <sup>a</sup>  | chr06.fgenesh2415         | S/N | S/N | N   | S/N | S/N | S/N | N   | N   | N   | N   | N   | S/N |
| 190 <sup>a</sup>  | chr06.fgenesh2949         | N/S | N/S | N   | N/S | N/S | N/S | N   | N   | N   | N/S | N   | N   |
| 191 <sup>ab</sup> | chr10.fgenesh935(S)       | N/S | N/S | N   | N/S | N/S | N   | N/S | N   | N   | N/S | N   | N   |
| 192               | chr01.fgenesh978          | N   | N/S | N/S | N/S | N/S | N/S | N   | N/S | N   | N   | N/S | N   |
| 193               | chr01.fgenesh1182         | N/S | N/S | N   | N/S | N   | N/S | N/S | N   | N/S | N/S | N   | N   |
| 194               | chr01.fgenesh1321         | N   | N/S | N/S | N/S | N/S | N/S | N   | N/S | N   | N   | N/S | N   |
| 195               | chr01.fgenesh2997         | N   | N/S | N/S | N/S | N/S | N/S | N   | N/S | N   | N   | N/S | N   |

|                  |                         |     |     |     |     |     |     |     |     |     |     |     |     |
|------------------|-------------------------|-----|-----|-----|-----|-----|-----|-----|-----|-----|-----|-----|-----|
| 196              | chr02.fgenes1279        | N   | S/N | S/N | S/N | S/N | S/N | N   | S/N | N   | N   | S/N | N   |
| 197              | chr03.fgenes2361        | S/N | S/N | S/N | S/N | S/N | N   | S/N | N   | N   | N   | N   | S/N |
| 198              | chr04.fgenes2910        | N/S | N/S | N/S | N/S | N/S | N   | N/S | N   | N/S | N   | N   | N   |
| 199              | chr06.fgenes1317        | S/N | N   | N   | N   | N   | N   |
| 200              | chr12.fgenes57          | N/S | N/S | N   | N/S | N/S | N/S | N/S | N   | N   | N/S | N   | N   |
| 201              | tig00012122.fgenes108   | N/S | N/S | N/S | N/S | N/S | N   | N/S | N   | N   | N/S | N   | N   |
| 202 <sup>a</sup> | chr11.fgenes2151        | S/N | S/N | S/N | S/N | S/N | N   | S/N | N   | N   | N   | N   | S/N |
| 203 <sup>b</sup> | chr01.fgenes925(S)      | N/S | N/S | N   | N/S | N   | N/S | N/S | N   | N/S | N/S | N   | N   |
| 204 <sup>b</sup> | chr09.fgenes619(S)      | N/S | N/S | N/S | N/S | N/S | N   | N/S | N   | N/S | N   | N   | N   |
| 205 <sup>b</sup> | chr11.fgenes1293(H)     | N/S | N/S | N/S | N/S | N/S | N   | N/S | N   | N   | N   | N   | N/S |
| 206 <sup>b</sup> | tig00011639.fgenes73(H) | N   | S/N | S/N | S/N | S/N | S/N | N   | S/N | N   | N   | S/N | N   |
| 207              | chr01.fgenes4262        | N   | N/S | N/S | N/S | N/S | N/S | N   | N/S | N/S | N   | N/S | N   |
| 208              | chr04.fgenes2315        | N   | N/S | N/S | N/S | N/S | N/S | N   | N/S | N/S | N   | N/S | N   |
| 209              | chr08.fgenes1325        | N   | S/N | N   | N   | S/N | N   |
| 210 <sup>a</sup> | chr03.fgenes1751        | N   | N/S | N   | N   | N/S | N   |
| 211 <sup>a</sup> | chr11.fgenes1547        | N   | S/N | S/N | S/N | S/N | S/N | N   | S/N | S/N | N   | S/N | N   |
| 212 <sup>b</sup> | chr08.fgenes1031(H)     | N   | N/S | N/S | N/S | N/S | N/S | N   | N/S | N/S | N   | N/S | N   |
| 213 <sup>b</sup> | chr12.fgenes921(H)      | N   | N/S | N/S | N/S | N/S | N/S | N   | N/S | N/S | N   | N/S | N   |
| 214              | chr11.fgenes1894        | N/S | N/S | N/S | N/S | N/S | N   | N/S | N   | N/S | N/S | N   | N/S |
| 215              | tig00000727.fgenes189   | S/N | N   | N   | N   |
| 216 <sup>a</sup> | chr06.fgenes2768        | N/S | N/S | N/S | N/S | N/S | N   | N/S | N   | N/S | N/S | N   | N/S |
| 217              | tig00011498.fgenes17    | N   | S/N | N   | S/N | S/N |
| 218              | chr11.fgenes2065        | N   | S/S | S/N | S/S | S/S | S/N | S/N | S/N | S/N | S/N | S/N | S/S |
| 219 <sup>a</sup> | chr11.fgenes2371        | N/S | S/S | N/S | N/S | S/S | N/S |

\* These IDs are used in Fig. 1; <sup>a</sup> Inherited *NLRs*; <sup>b</sup> Paired *NLRs*, H: Helper, S: Sensor.



**Table S7. Tetep *NLRs* tested using nine additional blast pathogen strains. Seven *NLRs* which conferred resistance to  $\geq 5$  blast isolates were further tested using nine additional pathogen isolates (Y10 to S2005). This table uses the same notations as Table S6.**

| ID  | Gene ID              | Y10 | B3  | S21 | S32 | Y1  | S2  | S12-4-2 | S33 | S2005 |
|-----|----------------------|-----|-----|-----|-----|-----|-----|---------|-----|-------|
| 001 | chr12.fgenes1062     | R/N | R/N | R/N | R/N | R/N | R/N | S/N     | S/N | S/N   |
| 002 | chr06.fgenes1195     | R/N | R/N | R/N | R/N | R/N | S/N | N       | N   | N     |
| 003 | chr06.fgenes377      | R/N | R/N | S/N | S/N | S/N | R/R | N       | N   | N     |
| 005 | chr06.fgenes378      | S/N | N   | N   | R/N | N   | R/S | N       | R/N | N     |
| 008 | chr05.fgenes1166     | N   | N   | N   | S/N | N   | N/S | N       | S/S | N     |
| 010 | tig00011732.fgenes48 | N/S | N   | N   | N   | N   | S/S | N       | N   | N     |
| 011 | chr11.fgenes2349     | S/S | N   | N   | N   | N   | S/S | R/S     | N   | S/R   |

**Table S8. List of *NLR* pairs in Tetep and Nipponbare genomes.**

Each member of a pair is suffixed with “-H” if it’s a helper and “-S” if it’s a sensor. The unusual domains are given in the last column.

| Genome     | Pair ID        | Gene ID        | Unusual Domains (Descriptions)                                                    |
|------------|----------------|----------------|-----------------------------------------------------------------------------------|
| Nipponbare | NP1-H          | LOC_Os01g16400 | -                                                                                 |
|            | NP1-S          | LOC_Os01g16390 | -                                                                                 |
|            | NP2-H          | LOC_Os08g30660 | -                                                                                 |
|            | NP2-S          | LOC_Os08g30634 | -                                                                                 |
|            | NP3-H          | LOC_Os11g27430 | -                                                                                 |
|            | NP3-S          | LOC_Os11g27440 | -                                                                                 |
|            | NP4-H          | LOC_Os11g45790 | -                                                                                 |
|            | NP4-S          | LOC_Os11g45920 | WRKY63;Syntaxin(membrane integrated Q-SNARE proteins participating in exocytosis) |
|            | NP5-H          | LOC_Os12g31200 | -                                                                                 |
|            | NP5-S          | LOC_Os12g31160 | -                                                                                 |
|            | NP6-H          | LOC_Os08g45030 | -                                                                                 |
|            | NP6-S          | LOC_Os08g45010 | -                                                                                 |
|            | NP7-H          | LOC_Os12g28050 | -                                                                                 |
|            | NP7-S          | LOC_Os12g28040 | -                                                                                 |
|            | NP8-H          | LOC_Os08g28540 | -                                                                                 |
|            | NP8-S          | LOC_Os08g28460 | -                                                                                 |
|            | NP9-H          | LOC_Os11g29050 | -                                                                                 |
|            | NP9-S          | LOC_Os11g29060 | -                                                                                 |
|            | NP10-H         | LOC_Os01g58530 | -                                                                                 |
|            | NP10-S         | LOC_Os01g58520 | -                                                                                 |
| NP11-H     | LOC_Os03g10900 | -              |                                                                                   |
| NP11-S     | LOC_Os03g10910 | -              |                                                                                   |

|  |                   |                |                                  |
|--|-------------------|----------------|----------------------------------|
|  | NP12-H            | LOC_Os04g41370 | -                                |
|  | NP12-S            | LOC_Os04g41380 | GAS(microtubule-binding protein) |
|  | NP13-H            | LOC_Os05g40160 | -                                |
|  | NP13-S            | LOC_Os05g40150 | -                                |
|  | NP14-H            | LOC_Os05g50780 | -                                |
|  | NP14-S            | LOC_Os05g50790 | -                                |
|  | NP15-H            | LOC_Os07g29820 | -                                |
|  | NP15-S            | LOC_Os07g29810 | -                                |
|  | NP16-H            | LOC_Os07g33720 | -                                |
|  | NP16-S            | LOC_Os07g33710 | -                                |
|  | NP17-H            | LOC_Os07g33740 | -                                |
|  | NP17-S            | LOC_Os07g33730 | -                                |
|  | NP18-H            | LOC_Os08g14830 | -                                |
|  | NP18-S            | LOC_Os08g14810 | -                                |
|  | NP19-H            | LOC_Os08g20000 | -                                |
|  | NP19-S            | LOC_Os08g19980 | -                                |
|  | NP20-H            | LOC_Os09g14450 | -                                |
|  | NP20-S            | LOC_Os09g14410 | -                                |
|  | NP21-H<br>(Pi5-1) | LOC_Os09g15840 | -                                |
|  | NP21-S<br>(Pi5-2) | LOC_Os09g15850 | -                                |
|  | NP22-H            | LOC_Os10g04090 | -                                |
|  | NP22-S            | LOC_Os10g04110 | -                                |
|  | NP23-H            | LOC_Os10g04180 | -                                |

|  |                  |                |                                                              |
|--|------------------|----------------|--------------------------------------------------------------|
|  | NP23-S           | LOC_Os10g04290 | -                                                            |
|  | NP24-H           | LOC_Os10g04470 | -                                                            |
|  | NP24-S           | LOC_Os10g04480 | -                                                            |
|  | NP25-H           | LOC_Os10g22300 | -                                                            |
|  | NP25-S           | LOC_Os10g22484 | -                                                            |
|  | NP26-H           | LOC_Os10g22510 | -                                                            |
|  | NP26-S           | LOC_Os10g22490 | -                                                            |
|  | NP27-H           | LOC_Os11g11550 | -                                                            |
|  | NP27-S           | LOC_Os11g11580 | -                                                            |
|  | NP28-H<br>(RGA4) | LOC_Os11g11790 | -                                                            |
|  | NP28-S<br>(RGA5) | LOC_Os11g11810 | -                                                            |
|  | NP29-H           | LOC_Os11g11940 | -                                                            |
|  | NP29-S           | LOC_Os11g11920 | NOI(AvrRpt-cleavage, binding of the protein to RCS and AvrB) |
|  | NP30-H           | LOC_Os11g29030 | -                                                            |
|  | NP30-S           | LOC_Os11g29014 | -                                                            |
|  | NP31-H           | LOC_Os11g30050 | -                                                            |
|  | NP31-S           | LOC_Os11g30060 | -                                                            |
|  | NP32-H           | LOC_Os11g37040 | -                                                            |
|  | NP32-S           | LOC_Os11g37050 | -                                                            |
|  | NP33-H           | LOC_Os11g39160 | -                                                            |
|  | NP33-S           | LOC_Os11g39190 | -                                                            |
|  | NP34-H           | LOC_Os11g39230 | -                                                            |
|  | NP34-S           | LOC_Os11g39290 | CREPT(transcriptional regulators)                            |

|  |                   |                |                                                                                                              |
|--|-------------------|----------------|--------------------------------------------------------------------------------------------------------------|
|  | NP35-H            | LOC_Os11g39320 | -                                                                                                            |
|  | NP35-S            | LOC_Os11g39310 | -                                                                                                            |
|  | NP36-H            | LOC_Os11g39340 | -                                                                                                            |
|  | NP36-S            | LOC_Os11g39330 | -                                                                                                            |
|  | NP37-H            | LOC_Os11g42070 | -                                                                                                            |
|  | NP37-S            | LOC_Os11g42060 | -                                                                                                            |
|  | NP38-H            | LOC_Os11g42090 | -                                                                                                            |
|  | NP38-S            | LOC_Os11g42100 | -                                                                                                            |
|  | NP39-H            | LOC_Os11g45760 | -                                                                                                            |
|  | NP39-S            | LOC_Os11g45750 | WRKY125;Syntaxin(membrane integrated Q-SNARE proteins participating in exocytosis);SRP54(signal recognition) |
|  | NP40-H            | LOC_Os11g45930 | -                                                                                                            |
|  | NP40-S            | LOC_Os11g45924 | WRKY41                                                                                                       |
|  | NP41-H            | LOC_Os11g45980 | -                                                                                                            |
|  | NP41-S            | LOC_Os11g45970 | -                                                                                                            |
|  | NP42-H            | LOC_Os11g46070 | -                                                                                                            |
|  | NP42-S            | LOC_Os11g46080 | -                                                                                                            |
|  | NP43-H            | LOC_Os11g46190 | -                                                                                                            |
|  | NP43-S            | LOC_Os11g46140 | -                                                                                                            |
|  | NP44-S<br>(Pik-1) | LOC_Os11g46200 | RATX1(Related to ATX1, mediate Avr recognition)                                                              |
|  | NP44-H<br>(Pik-2) | LOC_Os11g46210 | -                                                                                                            |
|  | NP45-H            | LOC_Os12g10330 | -                                                                                                            |
|  | NP45-S            | LOC_Os12g10340 | -                                                                                                            |

|              |                   |                  |                                                                                                            |
|--------------|-------------------|------------------|------------------------------------------------------------------------------------------------------------|
|              | NP46-H            | LOC_Os12g10390   | -                                                                                                          |
|              | NP46-S            | LOC_Os12g10400   | -                                                                                                          |
|              | NP47-H<br>(Pi42)  | LOC_Os12g18374   | -                                                                                                          |
|              | NP47-S<br>(Pi-ta) | LOC_Os12g18360   | TRX(Thioredoxin, cell-to-cell communication);EN(Endotoxin N, insecticidal toxins, receptor binding)        |
| <b>Tetep</b> | TP1-H             | chr01.fgenes1926 | -                                                                                                          |
|              | TP1-S             | chr01.fgenes1925 | -                                                                                                          |
|              | TP2-H             | chr01.fgenes1325 | -                                                                                                          |
|              | TP2-S             | chr01.fgenes1326 | -                                                                                                          |
|              | TP3-H             | chr01.fgenes4234 | -                                                                                                          |
|              | TP3-S             | chr01.fgenes4235 | -                                                                                                          |
|              | TP4-H             | chr04.fgenes1881 | -                                                                                                          |
|              | TP4-S             | chr04.fgenes1882 | GAS(microtubule-binding protein)                                                                           |
|              | TP5-H             | chr07.fgenes1251 | -                                                                                                          |
|              | TP5-S             | chr07.fgenes1250 | TRX(Thioredoxin, cell-to-cell communication);Glutaredoxin(flower development and Salicylic acid signaling) |
|              | TP6-H             | chr07.fgenes1750 | -                                                                                                          |
|              | TP6-S             | chr07.fgenes1749 | -                                                                                                          |
|              | TP7-H             | chr08.fgenes688  | -                                                                                                          |
|              | TP7-S             | chr08.fgenes687  | -                                                                                                          |
|              | TP8-H             | chr08.fgenes1119 | -                                                                                                          |
|              | TP8-S             | chr08.fgenes1120 | -                                                                                                          |
| TP9-H        | chr09.fgenes619   | -                |                                                                                                            |
| TP9-S        | chr09.fgenes616   | -                |                                                                                                            |

|  |                  |                  |                                                                                                            |
|--|------------------|------------------|------------------------------------------------------------------------------------------------------------|
|  | TP10-H           | chr10.fgenes907  | -                                                                                                          |
|  | TP10-S           | chr10.fgenes908  | -                                                                                                          |
|  | TP11-H           | chr10.fgenes936  | -                                                                                                          |
|  | TP11-S           | chr10.fgenes935  | CG-1(DNA-binding protein)                                                                                  |
|  | TP12-H<br>(RGA4) | chr11.fgenes828  | -                                                                                                          |
|  | TP12-S<br>(RGA5) | chr11.fgenes829  | RATX1(Related to ATX1, mediate Avr recognition)                                                            |
|  | TP13-H           | chr11.fgenes1293 | -                                                                                                          |
|  | TP13-S           | chr11.fgenes1294 | -                                                                                                          |
|  | TP14-H           | chr11.fgenes1887 | -                                                                                                          |
|  | TP14-S           | chr11.fgenes1888 | -                                                                                                          |
|  | TP15-H           | chr11.fgenes1892 | -                                                                                                          |
|  | TP15-S           | chr11.fgenes1893 | -                                                                                                          |
|  | TP16-H           | chr11.fgenes1897 | -                                                                                                          |
|  | TP16-S           | chr11.fgenes1896 | -                                                                                                          |
|  | TP17-H           | chr11.fgenes1900 | -                                                                                                          |
|  | TP17-S           | chr11.fgenes1899 | -                                                                                                          |
|  | TP18-H           | chr11.fgenes1910 | -                                                                                                          |
|  | TP18-S           | chr11.fgenes1911 | -                                                                                                          |
|  | TP19-H           | chr11.fgenes2433 | -                                                                                                          |
|  | TP19-S           | chr11.fgenes2432 | WRKY;FLYWCH(zinc finger domain);Syntaxin(membrane integrated Q-SNARE proteins participating in exocytosis) |
|  | TP20-H           | chr11.fgenes2435 | -                                                                                                          |
|  | TP20-S           | chr11.fgenes2436 | -                                                                                                          |

|  |                   |                       |                                                           |
|--|-------------------|-----------------------|-----------------------------------------------------------|
|  | TP21-H            | chr11.fgenes2443      | -                                                         |
|  | TP21-S            | chr11.fgenes2442      | WRKY;FLYWCH(zinc finger domain);SRP54(signal recognition) |
|  | TP22-H            | chr11.fgenes2446      | -                                                         |
|  | TP22-S            | chr11.fgenes2445      | -                                                         |
|  | TP23-S            | chr11.fgenes2452      | -                                                         |
|  | TP23-H            | chr11.fgenes2451      | -                                                         |
|  | TP24-S<br>(Pik-1) | chr11.fgenes2455      | RATX1(Related to ATX1, mediate Avr recognition)           |
|  | TP24-H<br>(Pik-2) | chr11.fgenes2457      | -                                                         |
|  | TP25-H            | chr12.fgenes51        | -                                                         |
|  | TP25-S            | chr12.fgenes52        | -                                                         |
|  | TP26-H            | chr12.fgenes62        | -                                                         |
|  | TP26-S            | chr12.fgenes61        | -                                                         |
|  | TP27-H            | chr12.fgenes921       | -                                                         |
|  | TP27-S            | chr12.fgenes923       | -                                                         |
|  | TP28-S            | tig00001023.fgenes125 | -                                                         |
|  | TP28-H            | tig00001023.fgenes120 | -                                                         |
|  | TP29-H            | tig00011639.fgenes73  | -                                                         |
|  | TP29-S            | tig00011639.fgenes72  | -                                                         |
|  | TP30-H            | tig00011732.fgenes48  | -                                                         |
|  | TP30-S            | tig00011732.fgenes49  | -                                                         |
|  | TP31-H            | tig00011805.fgenes9   | -                                                         |
|  | TP31-S            | tig00011805.fgenes8   | -                                                         |
|  | TP32-H            | tig00012489.fgenes15  | -                                                         |



|  |                |                       |                                              |
|--|----------------|-----------------------|----------------------------------------------|
|  | (Pi42)         |                       |                                              |
|  | TP32-S (Pi-ta) | tig00012489.fgenes13  | TRX(Thioredoxin, cell-to-cell communication) |
|  | TP33-H         | tig00001023.fgenes110 | -                                            |
|  | TP33-S         | tig00001023.fgenes127 | -                                            |
|  | TP34-H         | tig00001023.fgenes136 | -                                            |
|  | TP34-S         | tig00001023.fgenes139 | -                                            |
|  | TP35-H         | chr11.fgenes1904      | -                                            |
|  | TP35-S         | chr11.fgenes1906      | SREBP(Sterol-sensing)                        |
|  | TP36-H         | chr11.fgenes2108      | -                                            |
|  | TP36-S         | chr11.fgenes2110      | -                                            |
|  | TP37-H         | chr01.fgenes3091      | -                                            |
|  | TP37-S         | chr01.fgenes3092      | -                                            |
|  | TP38-H         | chr08.fgenes2341      | -                                            |
|  | TP38-S         | chr08.fgenes2340      | -                                            |
|  | TP39-H         | chr03.fgenes814       | -                                            |
|  | TP39-S         | chr03.fgenes816       | -                                            |
|  | TP40-H         | chr12.fgenes929       | -                                            |
|  | TP40-S         | chr12.fgenes931       | -                                            |
|  | TP41-H         | chr12.fgenes1447      | -                                            |
|  | TP41-S         | chr12.fgenes1449      | TRX(Thioredoxin, cell-to-cell communication) |
|  | TP42-H         | chr08.fgenes1031      | -                                            |
|  | TP42-S         | chr08.fgenes1030      | -                                            |
|  | TP43-H         | chr12.fgenes893       | -                                            |
|  | TP43-S         | chr12.fgenes896       | -                                            |

**Table S9. Phenotypes of the sensor or helper mutants of the *NLR* pairs that were knocked out by CRISPR/Cas9.** The mutant types and phenotypes were collected from T<sub>1</sub> and confirmed in T<sub>2</sub> and T<sub>3</sub> generations.

| Pair ID | Gene ID    | Sensor (S) or Helper (H) | Genotypes            |                                                                              | Phenotypes of the mutants                                                                                                                                                                                                                                                                                             |
|---------|------------|--------------------------|----------------------|------------------------------------------------------------------------------|-----------------------------------------------------------------------------------------------------------------------------------------------------------------------------------------------------------------------------------------------------------------------------------------------------------------------|
|         |            |                          | Wild-type            | Mutant type                                                                  |                                                                                                                                                                                                                                                                                                                       |
| NP41    | Os11g45970 | S                        | TGGAGATCTCGCTTGATGAG | Not Available                                                                | Lethal (only a few very weak seedlings observed and eventually died. (3 repeats)                                                                                                                                                                                                                                      |
|         | Os11g45980 | H                        | AGTTCCACCTTTAAGGACAA | AGTTCCACCTTTAAGG <b>A</b> ACAA<br>AGTTCCACCTTTAAGG <b>A</b> ACAA             | Dwarfing, smaller seeds, but the other phenotypes were not different from the control. When this allele from Tetep (chr11.fgenesh2446) was transformed into a susceptible cultivar (TP309), the transgenic lines were resistant to a few blast strains, but the transgenic line plants were shorter than the control. |
| NP15    | Os07g29810 | S                        | CTGGTTTACGATACCACCAA | CTG <b>A</b> GTTTACGATACCACCAA<br>CTG <b>T</b> GTTTACGATACCACCAA             | Dwarfing, infertility.                                                                                                                                                                                                                                                                                                |
|         |            |                          |                      | CTGGTTT <b>T</b> ACGATACCACCAA<br>CTGGTTT ACGATACCACCAA                      | Dwarfing, low setting rate                                                                                                                                                                                                                                                                                            |
|         | Os07g29820 | H                        | TGGTGTAACCAGCTAGAATT | TGG - GTAACCAGCTAGAATT<br>TGG - GTAACCAGCTAGAATT                             | A little shorter, infection by rice blast in natural conditions.                                                                                                                                                                                                                                                      |
| NP18    | Os08g14810 | S                        | CTTGCAAACCATCTCCCAGG | CTTGCAAACCATCT - - CAGG<br>CTTGCAAACCATCT - - CAGG<br>CTTGCAAACCATCT - CCAGG | Early heading, smaller seeds                                                                                                                                                                                                                                                                                          |

|      |            |   |                      |                                                                                                                                                        |                                                                                                                                     |
|------|------------|---|----------------------|--------------------------------------------------------------------------------------------------------------------------------------------------------|-------------------------------------------------------------------------------------------------------------------------------------|
|      |            |   |                      | CTTGCAAACCATCT - CCAGG                                                                                                                                 |                                                                                                                                     |
|      | Os08g14830 | H | ATTGCTGCTGCACCGGCCCT | ATTGCTGCTGCACC -- TCCT<br>ATTGCTGCTGCACC -- TCCT<br>ATTGCTGCTGCACC ---GGT<br>ATTGCTGCTGCACC ---GGT<br>ATTGCTGCTGCACCGG --- T<br>ATTGCTGCTGCACCGG --- T | Dwarfing                                                                                                                            |
| NP42 | Os11g46080 | S | ACGAACGAGACATACCAAGA | Not Available                                                                                                                                          | Lethal (only a few very weak seedlings observed and eventually died. (3 repeats))                                                   |
|      | Os11g46070 | H | ATTGAAACCTGTGTAGAGAC | ATTGAAACCTGTGT -- AGAC<br>ATTGAAACCTGTGT -- AGAC                                                                                                       | A little shorter, smaller spike, and weak blast infection in natural conditions.                                                    |
| NP34 | Os11g39290 | S | ATCCGGCCTGCAGATACGGC | ATCCGGCCTGCAGATACTGGC<br>ATCCGGCCTGCAGATACTGGC                                                                                                         | A little shorter, smaller spike                                                                                                     |
|      | Os11g39230 | H | GTTAGGTACTCGATGGCAGA | GTTA - GTECTCGATGGCAGA<br>GTTA - GTECTCGATGGCAGA                                                                                                       | Just a little blast infection in natural conditions, smaller spike, while the other phenotypes were not different from the control. |
| NP3  | Os11g27440 | S | CAGGCAATCAGTTCATCCCT | Not Available                                                                                                                                          | Lethal, could not obtain transgenic seedlings (4 repeats)                                                                           |
|      | Os11g27430 | H | CGATCATCCGGAGCTCGTTC | CGATCATCCGGAG ----- TC<br>CGATCATCCGGAG ----- TC<br>CGATCATCCGGAGCTCGATTC<br>CGATCATCCGGAGCTCGATTC                                                     | A little shorter, but the other phenotypes were not different from the control.                                                     |
| NP35 | Os11g39310 | S | GAAACCTGCTCATCGCGAGC | GAAACCTGCTCATCGCGAGC<br>GA -----(delete 57 bp)                                                                                                         | Dwarfing and weak plant, infertility.                                                                                               |
|      | Os11g39320 | H | GGCGGCGAGCCCCGCGGGAC | GGCGGCGAGCCCCGCG- GAC                                                                                                                                  | No phenotypic change                                                                                                                |

|      |                                |   |                      |                                                                                                    |                                                                                                                                     |
|------|--------------------------------|---|----------------------|----------------------------------------------------------------------------------------------------|-------------------------------------------------------------------------------------------------------------------------------------|
|      |                                |   |                      | GGCGGCGAGCCCCGCG- GAC                                                                              |                                                                                                                                     |
| NP25 | Os10g22484                     | S | CTGTGAAGCACAAATCGGGG | CTGTGAAGCACAAATCGTGGG<br>CTGTGAAGCACAAATCGAGGG<br>CGGGG - GGCGAGGGGCGGGG<br>CGAGC GCGGCGAGGGGCGGGG | Blast pseudo-lesions in leaves of three- and six-week-old seedlings                                                                 |
|      | Os10g22300                     | H | GTGAAGACATGCCAACTGCC | Not mutated                                                                                        |                                                                                                                                     |
| NP4  | Os11g45920                     | S | GGCTACAGCTGGAGGAAGTA | Transformation failed                                                                              |                                                                                                                                     |
|      | Os11g45790                     | H | TCCCAGCGGAAGAACATCCC | No suitable primer available                                                                       |                                                                                                                                     |
| NP47 | Os12g18360<br>( <i>Pi-ta</i> ) | S | GGGAATAGAATGAAAAATCC | GGGAATAGAATGAAAAATCC<br>GGGAATAGAATGAAAAATCC<br>GGG -- TAGAATGAAAAATCC<br>GGG -- TAGAATGAAAAATCC   | A little shorter, weaker plants and frequent deaths                                                                                 |
|      | Os12g18374<br>( <i>Pi42</i> )  | H | CGCCTTCACCAAGTGCCTCG | Not mutated                                                                                        |                                                                                                                                     |
| NP13 | Os05g40150                     | S | GCACGCTTTCTGCAAAGCGT | Not mutated                                                                                        |                                                                                                                                     |
|      | Os05g40160                     | H | CCGGCGAGGACATCCAAAGT | Not mutated                                                                                        |                                                                                                                                     |
| NP2  | Os08g30634                     | S | TCCTACCGCTCCAGTCAGGA | TCCTACCGCTCCAGTCAAGGA<br>TCCTACCGCTCCAGTCATGGA                                                     | Dwarfing, infertility. Blast pseudo- lesions in leaves of three- and six-week-old seedlings manifesting the lesion mimic phenotype. |
|      | Os08g30660                     | H | GCTGTCAGGCAGTTGTAAGA | Transformation failed                                                                              |                                                                                                                                     |
| NP20 | Os09g14410                     | S | CGGCGCCGGATTGCCGTCGG | Not mutated                                                                                        |                                                                                                                                     |
|      | Os09g14450                     | H | GACCACGTTCTCGTCTTCCT | GACGCACGTTCTCGTCTTCCT<br>GACTCACGTTCTCGTCTTCCT                                                     | Dwarfing                                                                                                                            |
| NP23 | Os10g04290                     | S | CCTTATCCCATATCCTCAGG | Not mutated                                                                                        |                                                                                                                                     |
|      | Os10g04180                     | H | GATCTGATCAGGGGCGTCCG | Not mutated                                                                                        |                                                                                                                                     |

|      |            |   |                            |                       |
|------|------------|---|----------------------------|-----------------------|
| NP26 | Os10g22490 | S | TTGTGCTTCACAGGGAGCCA       | Transformation failed |
|      | Os10g22510 | H | AAATGCCTTTCCTTCTGATA       | Not mutated           |
| NP27 | Os11g11580 | S | AAAGGTAAGTGATCGAACTT       | Transformation failed |
|      | Os11g11550 | H | CTCTGTCACTAATATCGTCCG      | Transformation failed |
| NP28 | Os11g11810 | S | GTATCTTAGTTTATATTCGG       | Transformation failed |
|      | Os11g11790 | H | CCAAGAAAGCTTGCCCAGAG       | Transformation failed |
| NP29 | Os11g11920 | S | AGACAGGTCTTCAAACGACA       | Transformation failed |
|      | Os11g11940 | H | ATCTCGTAGAGGAAGTCTTC       | Transformation failed |
| NP33 | Os11g39190 | S | ACGAACATCATTACCCCAGT       | Transformation failed |
|      | Os11g39160 | H | ATTGGCACCGTTGAACCTGT       | Transformation failed |
| NP36 | Os11g39330 | S | TTCTGGAGGGCAATCGTCCA       | Not mutated           |
|      | Os11g39340 | H | No unique spacer available | Not assessed          |
| NP39 | Os11g45750 | S | CTCCACCAGCCCTACTTCAG       | Not mutated           |
|      | Os11g45760 | H | No unique spacer available | Not assessed          |
| NP40 | Os11g45924 | S | TCCACCTGCCATGTTGGCAT       | Not mutated           |
|      | Os11g45930 | H | GGACGACCATCAGCTTTCCA       | Transformation failed |
| NP43 | Os11g46140 | S | CATGATCAGATTAGCTTTGT       | Transformation failed |
|      | Os11g46190 | H | No unique spacer available | Not assessed          |
| NP44 | Os11g46200 | S | GGCCGTATACAGCGTCGCCA       | Transformation failed |
|      | Os11g46210 | H | TTGTTTTTCCTTGAGGCGAC       | Transformation failed |
| NP5  | Os12g31160 | S | TCAGCGAACGGACCTGAGAC       | Not mutated           |
|      | Os12g31200 | H | TGATTGTGATTGATGATGTG       | Transformation failed |

**Table S10. Verification of CRISPR/Cas9 edited plants.** Eight non-*NLR* genes were arbitrary selected and edited with the same procedures as in Wuyungeng24.

| Gene type                   | Gene ID    | No. of verified plants | No. of confirmed plants |
|-----------------------------|------------|------------------------|-------------------------|
| <b>Paired <i>NLRs</i></b>   | Os05g40150 | 14                     | 0                       |
|                             | Os05g40160 | 18                     | 0                       |
|                             | Os09g14410 | 7                      | 0                       |
|                             | Os10g04180 | 8                      | 0                       |
|                             | Os10g04290 | 9                      | 0                       |
|                             | Os10g22300 | 9                      | 0                       |
|                             | Os10g22510 | 10                     | 0                       |
|                             | Os11g39330 | 7                      | 0                       |
|                             | Os11g45750 | 11                     | 0                       |
|                             | Os11g45924 | 9                      | 0                       |
|                             | Os12g18374 | 9                      | 0                       |
|                             | Os12g31160 | 6                      | 0                       |
|                             | Os07g29810 | 11                     | 11                      |
|                             | Os07g29820 | 3                      | 2                       |
|                             | Os08g14810 | 6                      | 3                       |
|                             | Os08g14830 | 2                      | 2                       |
|                             | Os08g30634 | 10                     | 3                       |
|                             | Os09g14450 | 10                     | 2                       |
|                             | Os10g22484 | 21                     | 15                      |
|                             | Os11g27430 | 8                      | 2                       |
|                             | Os11g39230 | 10                     | 10                      |
|                             | Os11g39290 | 6                      | 6                       |
|                             | Os11g39310 | 16                     | 2                       |
|                             | Os11g39320 | 9                      | 1                       |
|                             | Os11g45980 | 8                      | 8                       |
|                             | Os11g46070 | 12                     | 2                       |
|                             | Os12g18360 | 15                     | 9                       |
|                             | Os11g27440 | lethal                 | -                       |
|                             | Os11g45970 | lethal                 | -                       |
|                             | Os11g46080 | lethal                 | -                       |
| <b>Non-<i>NLR</i> genes</b> | Os01g71000 | 5                      | 5                       |
|                             | Os02g01440 | 4                      | 4                       |
|                             | Os05g09520 | 4                      | 1                       |
|                             | Os05g49680 | 4                      | 1                       |
|                             | Os05g49780 | 2                      | 0                       |
|                             | Os06g39640 | 2                      | 2                       |
|                             | Os07g48980 | 6                      | 1                       |
|                             | Os10g20160 | 13                     | 13                      |

**Table S11. Tetep NLRs that failed in transformation or to produce seeds after transformation.** After co-culturing and screening, around 36 differentiated calli (6 flasks with 6 calli per flask) were obtained for each transformant. Only one callus was obtained for *tig00011805.fgenes8*. The differentiated calli were further cultured to ensure at least 8 rooted plantlets. Some transformants like *chr10.fgenes539*, *chr01.fgenes1470* and *chr11.fgenes2316* could only have fewer than 8 rooted plantlets. No plantlets survived and grew into new plants for the first 5 genes. For the remaining 6 genes, although the transformants could grow into new plants, the mature plants were found to die quickly or eventually infertile, so that no seeds were obtained from those transformants for further resistance testing.

| No. | Gene ID                         | Receptor | Differentiated calli | Rooted plantlets | Regenerated plantlets |
|-----|---------------------------------|----------|----------------------|------------------|-----------------------|
| 1   | chr01.fgenes3154                | TP309    | 36                   | ≥ 8              | 0                     |
| 2   | chr10.fgenes539                 | TP309    | 36                   | 7                | 0                     |
| 3   | chr11.fgenes828<br>(TP12-H)     | TP309    | 36                   | ≥ 8              | 0                     |
|     |                                 | Shin2    | 36                   | ≥ 8              | 0                     |
| 4   | chr11.fgenes1892<br>(TP15-H)    | TP309    | 36                   | ≥ 8              | 0                     |
|     |                                 | Shin2    | 36                   | ≥ 8              | 0                     |
| 5   | tig00011805.fgenes8<br>(TP31-S) | TP309    | 1                    | 0                | 0                     |
| 6   | chr01.fgenes1470                | TP309    | 36                   | 5                | 2                     |
| 7   | chr02.fgenes1404                | TP309    | 36                   | ≥ 8              | 7                     |
| 8   | chr02.fgenes3478                | TP309    | 36                   | 15               | 7                     |
| 9   | chr10.fgenes935                 | TP309    | 36                   | 16               | 9                     |
| 10  | chr11.fgenes829<br>(TP12-S)     | Shin2    | 36                   | 16               | 10                    |
|     |                                 | TP309    | 36                   | ≥ 8              | 5                     |
| 11  | chr11.fgenes2316                | TP309    | 36                   | 7                | 3                     |

**Table S12. Diversities of orthologous *NLR* pairs between Tetep and Nipponbare.** Diversity values were calculated using the coding sequences of the orthologous *NLR* pairs (i.e., *NLR* pairs with both orthologous helper and sensor members) between Tetep and Nipponbare.

| Orthologous pairs | Diversities between Tetep and Nipponbare |        |
|-------------------|------------------------------------------|--------|
|                   | Helper                                   | Sensor |
| TP1-NP1           | 0.0058                                   | 0.0623 |
| TP4-NP12          | 0.0104                                   | 0.0004 |
| TP6-NP16          | 0.1442                                   | 0.1728 |
| TP7-NP19          | 0.0028                                   | 0.0029 |
| TP9-NP20          | 0.0014                                   | 0.0201 |
| TP11-NP26         | 0.0042                                   | 0.1257 |
| TP12-NP28         | 0.0151                                   | 0.3087 |
| TP13-NP3          | 0.0352                                   | 0.0037 |
| TP14-NP33         | 0.0411                                   | 0.0003 |
| TP16-NP35         | 0.0003                                   | 0.0437 |
| TP19-NP39         | 0.0658                                   | 0.0914 |
| TP24-NP44         | 0.1242                                   | 0.2347 |
| TP25-NP45         | 0.0293                                   | 0.0470 |
| TP28-NP23         | 0.0000                                   | 0.0224 |
| TP29-NP18         | 0.0049                                   | 0.0058 |
| TP32-NP47         | 0.0129                                   | 0.0020 |
| TP35-NP27         | 0.3445                                   | 0.3834 |
| TP36-NP38         | 0.1953                                   | 0.0641 |
| TP39-NP11         | 0.0029                                   | 0.0022 |
| <b>Average</b>    | 0.0548                                   | 0.0839 |



**Table S13. Estimation of the Tetep genome size using K-mer analysis of Illumina reads.**

| <b>Data source</b> | <b>Total number of reads</b> | <b>Average read length</b> | <b>K-mer length</b> | <b>No. of K-mers frequency <math>\leq 1</math></b> | <b>Overall depth estimated from K-mer distribution</b> | <b>Estimated Genome size* (Mb)</b> |
|--------------------|------------------------------|----------------------------|---------------------|----------------------------------------------------|--------------------------------------------------------|------------------------------------|
| Illumina PE100     | 93,480,914                   | 100                        | 19                  | 282,085,268                                        | 20                                                     | 369.2                              |
| Illumina PE150     | 161,737,412                  | 150                        | 19                  | 633,247,290                                        | 50                                                     | 414.3                              |

\* Genome size estimated using the methods described in Zhang et al.(43).

**Table S14. Repeat contents of the Tetep genome masked by RepeatMasker.**

|                                    | <b>Number of elements</b> | <b>Length occupied (bp)</b> | <b>Percentage of sequence (%)</b> |
|------------------------------------|---------------------------|-----------------------------|-----------------------------------|
| <b>Retroelements</b>               | 77,450                    | 116,988,405                 | 28.14                             |
| Non-LTR elements                   | 25,438                    | 10,136,247                  | 2.44                              |
| SINEs:                             | 6,997                     | 1,016,674                   | 0.24                              |
| LINEs:                             | 9,444                     | 4,600,077                   | 1.11                              |
| L1/CIN4                            | 8,997                     | 4,519,496                   | 1.09                              |
| LTR elements:                      | 61,009                    | 111,371,654                 | 26.79                             |
| Ty1/Copia                          | 10,252                    | 12,978,237                  | 3.12                              |
| Gypsy/DIRS1                        | 45,098                    | 96,300,549                  | 23.17                             |
| <b>DNA transposons</b>             | 221,923                   | 62,499,085                  | 15.04                             |
| hobo-Activator                     | 28,665                    | 5,662,615                   | 1.36                              |
| Tc1-IS630-Pogo                     | 40,978                    | 7,299,510                   | 1.76                              |
| Tourist/Harbinger                  | 50,982                    | 10,671,694                  | 2.57                              |
| Other                              | 61                        | 7,542                       | 0.00                              |
| Unclassified:                      | 54,486                    | 14,817,065                  | 3.56                              |
| <b>Total interspersed repeats:</b> |                           | 194,304,555                 | 46.74                             |
| Small RNA:                         | 4,717                     | 863,927                     | 0.21                              |
| Satellites:                        | 751                       | 2,257,457                   | 0.54                              |
| Simple repeats:                    | 95,628                    | 4,704,165                   | 1.13                              |
| Low complexity:                    | 10,439                    | 521,022                     | 0.13                              |

**Dataset S1 (separate file). Verified PCR primer pairs for rapid testing of Tetep-derived *NLRs*.** A total of, 282 PCR primer pairs were verified, which covered over half of Tetep *NLRs*, mainly targeting *NLR* clusters and pairs. The indel-based primer pairs (“INS” and “DEL” stand for “insertion” and “deletion” relative to the Tetep genome) distinguish Tetep-derived *NLRs* from those of the other cultivar compared and produce different amplicon sizes (“Larger size” and “Shorter size”). The allelic-specific primer pairs (PA) can only amplify Tetep-derived *NLRs*, so that no PCR band is expected from another genome (denoted as “No Band”). Other primer pairs targeting polymorphic regions (VAR) either serve as allelic primers or could be distinguished by Sanger sequencing (the confirmed variants were marked as “DIFF SEQs”). All 282 primer pairs were successfully verified in either Nipponbare or 9311 or both. Actually, only 2 and 3 primer pairs are required to verify a *NLR* pair (prefix with “TP”) and a cluster (prefix with “CL”), respectively, as shown in Fig. S6. Hence, only half of those primer pairs (marked by “P” for *NLR* pairs, and “C” for *NLR* clusters) were required to verify all *NLR* pairs and clusters. Other primers can verify single *NLRs*, especially those functional ones (denoted by “NLR\_R”). “ND” means no difference within the primer regions between Tetep and the other genome.

**Dataset S2 (separate file). Predicted medium-sized INDELS between Tetep and each of the four genomes within *NLR* regions.** Based on the genome alignments (aligned with "nucmer" from MUMmer with option "--maxmatch -c 200 -l 100"), medium sized (100~1000bp) insertions (INS) or deletions (DEL) were obtained using "dnadiff" from MUMmer with default settings. All coordinates are based on the assembled Tetep genome. For instance, an insertion in "Nipponbare-Tetep" stands for an insertion in Nipponbare compared to Tetep, while a deletion represents a deleted region in Nipponbare compared to Tetep. *NLRs* overlaps or near ( $\leq 10$ kbp) those INDELS are given behind.

**Dataset S3 (separate file). Full list of small variant markers between Tetep and each of the four genomes within *NLR* regions.** SNPs and small INDELS (<100bp) within or around ( $\leq 1$ kbp) *NLRs* are given based on the comparison results between each of the four genomes with Tetep. All coordinates are based on the assembled Tetep genome.

**Dataset S4 (separate file). List of PCR primer pairs and restriction sites used in large-scale cloning of Tetep *NLRs*.**

## References

1. Murray MG, Thompson WF (1980) Rapid isolation of high molecular weight plant DNA. *Nucleic Acids Res* 8(19):4321–4325.
2. Koren S, et al. (2017) Canu: scalable and accurate long-read assembly via adaptive k-mer weighting and repeat separation. *Genome Res* 27(5):722–736.

3. Zhang J, et al. (2016) Extensive sequence divergence between the reference genomes of two elite indica rice varieties Zhenshan 97 and Minghui 63. *PNAS*:201611012.
4. Tamazian G, et al. (2016) Chromosomer: a reference-based genome arrangement tool for producing draft chromosome sequences. *GigaScience* 5:38.
5. English AC, et al. (2012) Mind the Gap: Upgrading Genomes with Pacific Biosciences RS Long-Read Sequencing Technology. *PLOS ONE* 7(11):e47768.
6. Mahesh HB, et al. (2016) Indica rice genome assembly, annotation and mining of blast disease resistance genes. *BMC Genomics* 17:242.
7. Li H (2013) Aligning sequence reads, clone sequences and assembly contigs with BWA-MEM. *arXiv:13033997 [q-bio]*. Available at: <http://arxiv.org/abs/1303.3997> [Accessed May 10, 2016].
8. DePristo MA, et al. (2011) A framework for variation discovery and genotyping using next-generation DNA sequencing data. *Nat Genet* 43(5):491–498.
9. Kurtz S, et al. (2004) Versatile and open software for comparing large genomes. *Genome Biology* 5(2):R12.
10. Campbell MS, et al. (2014) MAKER-P: A Tool Kit for the Rapid Creation, Management, and Quality Control of Plant Genome Annotations. *Plant Physiol* 164(2):513–524.
11. Korf I (2004) Gene finding in novel genomes. *BMC Bioinformatics* 5:59.
12. Stanke M, Steinkamp R, Waack S, Morgenstern B (2004) AUGUSTUS: a web server for gene finding in eukaryotes. *Nucleic Acids Res* 32(Web Server issue):W309–W312.
13. Trapnell C, et al. (2010) Transcript assembly and quantification by RNA-Seq reveals unannotated transcripts and isoform switching during cell differentiation. *Nature Biotechnology* 28(5):511–515.
14. Dobin A, et al. (2013) STAR: ultrafast universal RNA-seq aligner. *Bioinformatics* 29(1):15–21.
15. Grabherr MG, et al. (2011) Trinity: reconstructing a full-length transcriptome without a genome from RNA-Seq data. *Nat Biotechnol* 29(7):644–652.
16. Finn RD, et al. (2009) The Pfam protein families database. *Nucleic Acids Research* 38(Database):D211–D222.
17. Steuernagel B, Jupe F, Witek K, Jones JDG, Wulff BBH (2015) NLR-parser: rapid annotation of plant NLR complements. *Bioinformatics* 31(10):1665–1667.
18. Salamov AA, Solovyev VV (2000) Ab initio Gene Finding in Drosophila Genomic DNA. *Genome Res* 10(4):516–522.
19. Smit A, Hubley R, Green P (2013) RepeatMasker Open-4.0. *RepeatMasker website*. Available at: <http://www.repeatmasker.org> [Accessed February 14, 2017].
20. Emms DM, Kelly S (2015) OrthoFinder: solving fundamental biases in whole genome comparisons dramatically improves orthogroup inference accuracy. *Genome Biology* 16(1):157.
21. Edgar RC (2004) MUSCLE: multiple sequence alignment with high accuracy and high throughput. *Nucl Acids Res* 32(5):1792–1797.
22. Kumar S, Stecher G, Peterson D, Tamura K (2012) MEGA-CC: Computing

- Core of Molecular Evolutionary Genetics Analysis program for automated and iterative data analysis. *Bioinformatics* 28(20):2685–2686.
23. Larkin MA, et al. (2007) Clustal W and Clustal X version 2.0. *Bioinformatics* 23(21):2947–2948.
  24. Price MN, Dehal PS, Arkin AP (2010) FastTree 2 – Approximately Maximum-Likelihood Trees for Large Alignments. *PLoS ONE* 5(3):e9490.
  25. Liu K, Linder CR, Warnow T (2011) RAXML and FastTree: Comparing Two Methods for Large-Scale Maximum Likelihood Phylogeny Estimation. *PLoS ONE* 6(11):e27731.
  26. Nishimura MT, Monteiro F, Dangl JL (2015) Treasure Your Exceptions: Unusual Domains in Immune Receptors Reveal Host Virulence Targets. *Cell* 161(5):957–960.
  27. Huang J, Si W, Deng Q, Li P, Yang S (2014) Rapid evolution of avirulence genes in rice blast fungus *Magnaporthe oryzae*. *BMC Genetics* 15(1):45.
  28. IRRI (2002) *Standard Evaluation System for Rice (SES)* (Los Banos: International Rice Research Institute (IRRI), Manila, Philippines). 4th Ed. Available at: <http://catalog.hathitrust.org/api/volumes/oclc/50383518.html> [Accessed March 31, 2019].
  29. Chen Y, Xie C, Li B, Wang L (2002) Breeding and Application of Indica Restorer Line Mianhui 2009 with Good Blast Resistance. *Hybrid Rice* 17(6):6–7.
  30. Wang Y, Li S, Li H, Gao K (2004) Breeding and Utilization of Restorer Line Shuhui 527 with Good Grain Quality and High Combining Ability in Grain Yield. *Hybrid Rice* 19(4):12–14.
  31. Jing S, Chen K, Dong Y, Wang Z, Lu P (2001) Breeding and Utilization of Fine Quality Rice Restorer Line Chenghui 047. *Hybrid Rice* 16(3). doi:10.16267/j.cnki.1005-3956.2001.03.005.
  32. Zhang R, et al. (2013) Breeding and Application of Good-quality High-yield and Against Rice Blast Varieties Xiangdaonei 5 you 39. *Seed* 32(10). doi:10.3969/j.issn.1001-4705.2013.10.033.
  33. Katzen F (2007) Gateway<sup>®</sup> recombinational cloning: a biological operating system. *Expert Opinion on Drug Discovery* 2(4):571–589.
  34. Bae S, Park J, Kim J-S (2014) Cas-OFFinder: a fast and versatile algorithm that searches for potential off-target sites of Cas9 RNA-guided endonucleases. *Bioinformatics* 30(10):1473–1475.
  35. Hsu PD, et al. (2013) DNA targeting specificity of RNA-guided Cas9 nucleases. *Nature Biotechnology* 31(9):827–832.
  36. Xie Z, et al. (2016) Mutation rate analysis via parent–progeny sequencing of the perennial peach. I. A low rate in woody perennials and a higher mutagenicity in hybrids. *Proc R Soc B* 283(1841):20161016.
  37. Tang X, et al. (2018) A large-scale whole-genome sequencing analysis reveals highly specific genome editing by both Cas9 and Cpf1 (Cas12a) nucleases in rice. *Genome Biology* 19:84.
  38. Zhang H, Wu Z, Wang C, Li Y, Xu J-R (2014) Germination and infectivity of microconidia in the rice blast fungus *Magnaporthe oryzae*. *Nature*

*Communications* 5:4518.

39. Untergasser A, et al. (2012) Primer3—new capabilities and interfaces. *Nucleic Acids Res* 40(15):e115.
40. Zhang X, et al. (2015) A genome-wide survey reveals abundant rice blast R genes in resistant cultivars. *Plant J* 84(1):20–28.
41. Yang S, et al. (2013) Rapidly evolving R genes in diverse grass species confer resistance to rice blast disease. *PNAS*:201318211.
42. Yang J, et al. (2012) A Killer-Protector System Regulates Both Hybrid Sterility and Segregation Distortion in Rice. *Science* 337(6100):1336–1340.
43. Zhang Q, et al. (2012) The genome of *Prunus mume*. *Nat Commun* 3:1318.
